# Supplementary material
Source: publisher figshare collection journal article supplement (https://acs.figshare.com/ndownloader/files/22195206)
Supplement: Supplementary file 1 [file 22195206]

# Catalytic asymmetric diarylphosphine addition to $\alpha$ -diaoesters for the synthesis of P-stereogenic phosphinates via P\*-N bond formation

László B. Balázs,<sup>†</sup> Yinhua Huang,<sup>‡</sup> Jasmina B. Khalikuzzaman,<sup>†</sup> Yongxin Li,<sup>†</sup> Sumod A. Pullarkat<sup>\*†</sup> and Pak-Hing Leung<sup>\*†</sup>

<sup>†</sup>Division of Chemistry & Biological Chemistry, School of Physical and Mathematical Sciences, Nanyang Technological University, Singapore 637371

<sup>‡</sup>College of Material, Chemistry and Chemical Engineering, Hangzhou Normal University, Hangzhou 311121, China

\*e-mail for Pullarkat, S.A.: [sumod@ntu.edu.sg](mailto:sumod@ntu.edu.sg)

\*e-mail for Leung, P.-H.: [pakhing@ntu.edu.sg](mailto:pakhing@ntu.edu.sg)

## Supporting Information

### Table of content

|                                                 |     |
|-------------------------------------------------|-----|
| 1. Optimization of the reaction conditions..... | S2  |
| 2. Mechanistic studies.....                     | S4  |
| 3. NMR spectra.....                             | S18 |
| 4. HPLC spectra.....                            | S49 |
| 5. Stereochemical investigation on 6eb.....     | S61 |
| 6. X-Ray measurement data.....                  | S63 |
| 7. References.....                              | S71 |

## 1. Optimization of the reaction conditions

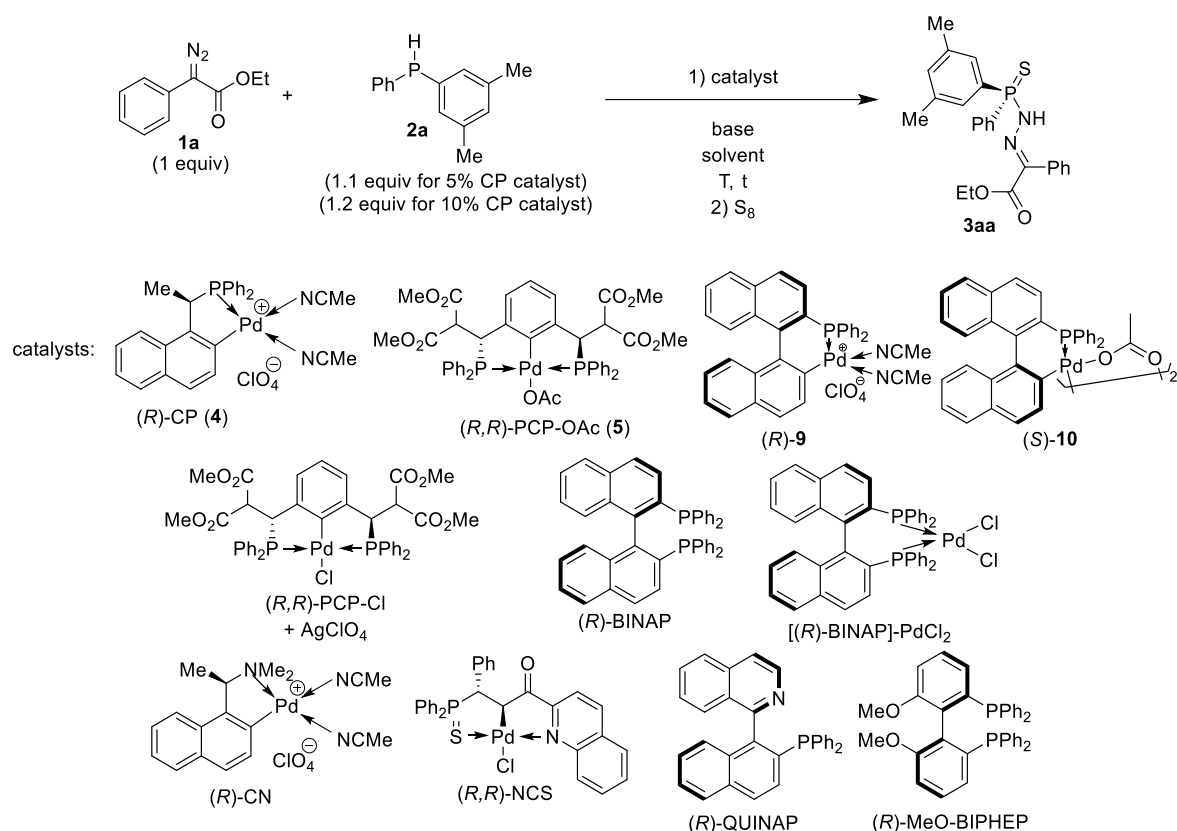

**Table S1** Reaction condition optimization of asymmetric phosphination of  $\alpha$ -diazoesters.

| Entry | Catalyst [mol%]                                                    | Solvent                          | Base (1 equiv)    | T [°C] | t    | Conversion <sup>a</sup> [%] | ee <sup>b</sup> [%] |
|-------|--------------------------------------------------------------------|----------------------------------|-------------------|--------|------|-----------------------------|---------------------|
| 1     | -                                                                  | CHCl <sub>3</sub>                | -                 | -40    | 16 h | -                           | -                   |
| 2     | -                                                                  | CHCl <sub>3</sub>                | Et <sub>3</sub> N | -40    | 16 h | -                           | -                   |
| 3     | 5% Pd(OAc) <sub>2</sub>                                            | CHCl <sub>3</sub>                | -                 | -40    | 16 h | -                           | -                   |
| 4     | 5% Pd(OAc) <sub>2</sub>                                            | acetone                          | -                 | rt     | 22 h | 19 <sup>c</sup>             | -                   |
| 5     | 5% Pd(MeCN) <sub>2</sub> Cl <sub>2</sub>                           | CHCl <sub>3</sub>                | DBU               | rt     | 24 h | 26 <sup>c</sup>             | -                   |
| 6     | 5% ( <i>R</i> )-CP ( <b>4</b> )                                    | CHCl <sub>3</sub>                | Et <sub>3</sub> N | -40    | 65 h | 69                          | 35                  |
| 7     | 10% ( <i>R</i> )-CP ( <b>4</b> )                                   | CHCl <sub>3</sub>                | Et <sub>3</sub> N | -40    | 65 h | 79                          | 39                  |
| 8     | 15% ( <i>R</i> )-CP ( <b>4</b> )                                   | CHCl <sub>3</sub>                | Et <sub>3</sub> N | -40    | 65 h | 93                          | 38                  |
| 9     | 20% ( <i>R</i> )-CP ( <b>4</b> )                                   | CHCl <sub>3</sub>                | Et <sub>3</sub> N | -40    | 65 h | 90                          | 38                  |
| 10    | 10% ( <i>R,R</i> )-PCP-OAc ( <b>5</b> )                            | CHCl <sub>3</sub>                | -                 | -40    | 72 h | 3 <sup>c</sup>              | N.D.                |
| 11    | 10% ( <i>R,R</i> )-PCP-OAc ( <b>5</b> )                            | CHCl <sub>3</sub>                | -                 | rt     | 48 h | 8 <sup>c</sup>              | 16                  |
| 12    | 5% ( <i>R,R</i> )-PCP-Cl / 10% AgClO <sub>4</sub>                  | CHCl <sub>3</sub> /acetone (8:1) | DBU               | -80    | 15 h | 29 <sup>c</sup>             | 8                   |
| 13    | 2.5% Pd <sub>2</sub> dba <sub>3</sub> / 6% ( <i>R</i> )-BINAP      | CHCl <sub>3</sub> /acetone (8:1) | DBU               | -80    | 15 h | 16 <sup>c</sup>             | 3                   |
| 14    | 5% Pd(OAc) <sub>2</sub> / 6% ( <i>R</i> )-BINAP                    | CHCl <sub>3</sub>                | DBU               | -40    | 65 h | no reaction                 | N.D.                |
| 15    | 5% [( <i>R</i> )-BINAP]-PdCl <sub>2</sub> / 10% AgClO <sub>4</sub> | CHCl <sub>3</sub>                | DBU               | -40    | 65 h | no reaction                 | N.D.                |
| 16    | 5% ( <i>R</i> )-CN                                                 | CHCl <sub>3</sub>                | DBU               | -40    | 65 h | no reaction                 | N.D.                |
| 17    | 5% ( <i>R,R</i> )-NCS                                              | CHCl <sub>3</sub>                | DBU               | -40    | 65 h | no reaction                 | N.D.                |
| 18    | 5% Pd(OAc) <sub>2</sub> / 6% ( <i>R</i> )-QUINAP                   | CHCl <sub>3</sub>                | DBU               | -40    | 65 h | no reaction                 | N.D.                |
| 19    | 5% Pd(OAc) <sub>2</sub> / 6% ( <i>R</i> )-MeO-BIPHEP               | CHCl <sub>3</sub>                | DBU               | -40    | 65 h | no reaction                 | N.D.                |
| 20    | 5% ( <i>R</i> )- <b>9</b>                                          | CHCl <sub>3</sub> /acetone (8:1) | DBU               | -80    | 40 h | 30 <sup>c</sup>             | 0                   |
| 21    | 5% ( <i>S</i> )- <b>10</b>                                         | CHCl <sub>3</sub> /acetone (8:1) | DBU               | -80    | 24 h | 54 <sup>c</sup>             | -15                 |
| 22    | 5% ( <i>R</i> )-CP ( <b>4</b> )                                    | CHCl <sub>3</sub>                | DMA <sup>d</sup>  | -40    | 24 h | no reaction                 | N.D.                |
| 23    | 5% ( <i>R</i> )-CP ( <b>4</b> )                                    | CHCl <sub>3</sub>                | DMA <sup>d</sup>  | rt     | 15 h | 61                          | 4                   |

|    |                                  |                                  |                    |     |      |                       |      |
|----|----------------------------------|----------------------------------|--------------------|-----|------|-----------------------|------|
| 24 | 5% ( <i>R</i> )-CP ( <b>4</b> )  | CHCl <sub>3</sub>                | DBU                | -40 | 24 h | 99                    | 36   |
| 25 | 5% ( <i>R</i> )-CP ( <b>4</b> )  | CHCl <sub>3</sub>                | TBD <sup>e,h</sup> | -40 | 3 h  | 99                    | 34   |
| 26 | 5% ( <i>R</i> )-CP ( <b>4</b> )  | CHCl <sub>3</sub>                | TMG <sup>f,h</sup> | -40 | 3 h  | 99                    | 38   |
| 27 | 5% ( <i>R</i> )-CP ( <b>4</b> )  | CHCl <sub>3</sub>                | DABCO              | -40 | 65 h | 30                    | 39   |
| 28 | 5% ( <i>R</i> )-CP ( <b>4</b> )  | MeCN                             | Et <sub>3</sub> N  | -40 | 65 h | 99                    | 29   |
| 29 | 5% ( <i>R</i> )-CP ( <b>4</b> )  | toluene                          | Et <sub>3</sub> N  | -40 | 65 h | 57                    | 17   |
| 30 | 5% ( <i>R</i> )-CP ( <b>4</b> )  | DCM                              | Et <sub>3</sub> N  | -40 | 72 h | 95                    | 31   |
| 31 | 5% ( <i>R</i> )-CP ( <b>4</b> )  | DCM                              | Et <sub>3</sub> N  | -80 | 72 h | 60                    | 40   |
| 32 | 5% ( <i>R</i> )-CP ( <b>4</b> )  | acetone                          | Et <sub>3</sub> N  | -40 | 72 h | 99                    | 28   |
| 33 | 5% ( <i>R</i> )-CP ( <b>4</b> )  | Et <sub>2</sub> O                | Et <sub>3</sub> N  | -40 | 65 h | 32                    | 25   |
| 34 | 5% ( <i>R</i> )-CP ( <b>4</b> )  | THF                              | Et <sub>3</sub> N  | -40 | 65 h | 7                     | 35   |
| 35 | 5% ( <i>R</i> )-CP ( <b>4</b> )  | neat                             | Et <sub>3</sub> N  | -40 | 24 h | 47                    | 10   |
| 36 | 5% ( <i>R</i> )-CP ( <b>4</b> )  | MeOH <sup>h</sup>                | Et <sub>3</sub> N  | -40 | 40 h | 99                    | 36   |
| 37 | 5% ( <i>R</i> )-CP ( <b>4</b> )  | EtOH                             | Et <sub>3</sub> N  | -40 | 40 h | 75                    | 29   |
| 38 | 5% ( <i>R</i> )-CP ( <b>4</b> )  | <sup>i</sup> PrOH                | Et <sub>3</sub> N  | -40 | 40 h | 79                    | 23   |
| 39 | 5% ( <i>R</i> )-CP ( <b>4</b> )  | DCE                              | Et <sub>3</sub> N  | -40 | 40 h | 28                    | 38   |
| 40 | 5% ( <i>R</i> )-CP ( <b>4</b> )  | CHBr <sub>3</sub> /DCM (1:1)     | Et <sub>3</sub> N  | -40 | 40 h | no reaction           | N.D. |
| 41 | 5% ( <i>R</i> )-CP ( <b>4</b> )  | CHCl <sub>3</sub> /acetone (5:1) | Et <sub>3</sub> N  | -80 | 17 h | 78                    | 49   |
| 42 | 10% ( <i>R</i> )-CP ( <b>4</b> ) | CHCl <sub>3</sub> /acetone (8:1) | Et <sub>3</sub> N  | -80 | 96 h | 60                    | 53   |
| 43 | 10% ( <i>R</i> )-CP ( <b>4</b> ) | CHCl <sub>3</sub> /acetone (8:1) | DBU                | -80 | 24 h | 94 (78%) <sup>g</sup> | 55   |
| 44 | 10% ( <i>R</i> )-CP ( <b>4</b> ) | CHCl <sub>3</sub> /THF (8:1)     | DBU                | -80 | 24 h | 90                    | 55   |

<sup>a</sup>Conversion was determined by <sup>31</sup>P{<sup>1</sup>H} NMR measurement of the crude mixture. <sup>b</sup>Enantiomeric excess was determined by chiral HPLC. <sup>c</sup>Significant amount of unidentified by-products were formed. <sup>d</sup>DMA: dimethylaniline. <sup>e</sup>TBD: 1,5,7-triazabicyclo[4.4.0]dec-5-ene. <sup>f</sup>TMG: 1,1,3,3-tetramethylguanidine. <sup>g</sup>Isolated yield in parentheses. <sup>h</sup>Remark: Methanol as solvent, TBD and TMG as external bases were reasonable choices based on these results; however, at -80 °C the obtained selectivity was low in the test reactions on substrate 3ca'.

## 2. Mechanistic studies

### a) Role of palladium and base:

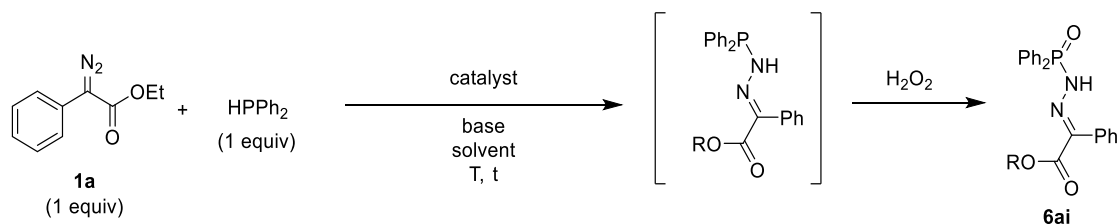

**Table S2** Control experiments for mechanistic investigations.

| Entry | Catalyst [mol%]         | Solvent | Base (1 equiv)    | T [°C] | t     | Conversion <sup>a</sup> [%] |
|-------|-------------------------|---------|-------------------|--------|-------|-----------------------------|
| 1     | -                       | acetone | -                 | rt     | 15 h  | 8                           |
| 2     | -                       | acetone | Et <sub>3</sub> N | rt     | 15 h  | 13                          |
| 3     | 5% Pd(OAc) <sub>2</sub> | acetone | Et <sub>3</sub> N | rt     | 1.5 h | 87 (80) <sup>b</sup>        |

<sup>a</sup>The conversion was calculated based on the <sup>31</sup>P{<sup>1</sup>H} NMR measurement of the crude mixture. <sup>b</sup>Isolated yield in parentheses.

Table S2, entry 1: In the first test reaction, neither catalyst nor base was added to the reaction mixture. The product was formed in 8% conversion based on <sup>31</sup>P{<sup>1</sup>H} NMR measurement during overnight.

Table S2, entry 2: In case if 1 equivalent triethylamine was added to the reactants, the conversion was slightly higher (13%).

Table S2, entry 3: If both palladium salt and triethylamine was applied, after 1,5 hours reaction time, **6ai** was produced in 87% NMR conversion and it was isolated in 80% yield. The presence of the base and the palladium salt significantly accelerated the reaction.

### b) Coordination studies for catalyst-substrate interaction:

Our previous studies on asymmetric hydrophosphination of activated alkenes proved that the P-H addition can occur either via intra-<sup>1,2</sup> or intermolecular<sup>3</sup> mechanism in the presence of palladacycle catalyst. In order to confirm any possible catalyst-substrate interaction between (*R*)-**4** and **1a**, coordination studies were conducted.

#### Coordination experiment 1:

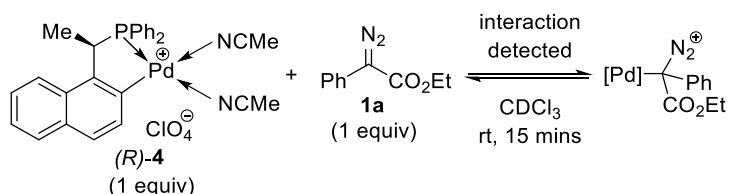

At first, equivalent amount of palladacycle and diazo substrate were mixed in CDCl<sub>3</sub> at room temperature, then multi nuclei NMR spectra were recorded of the mixture after 15 minutes. The observed spectra were compared with the pure (*R*)-**4** and **1a** NMR spectra (Figure S1).

**Figure S1** Comparison of the  $^1\text{H}$  NMR (400 MHz,  $\text{CDCl}_3$ ) spectra of (*R*)-**4** (blue), **1a** (red) and coordination experiment 1 (green).

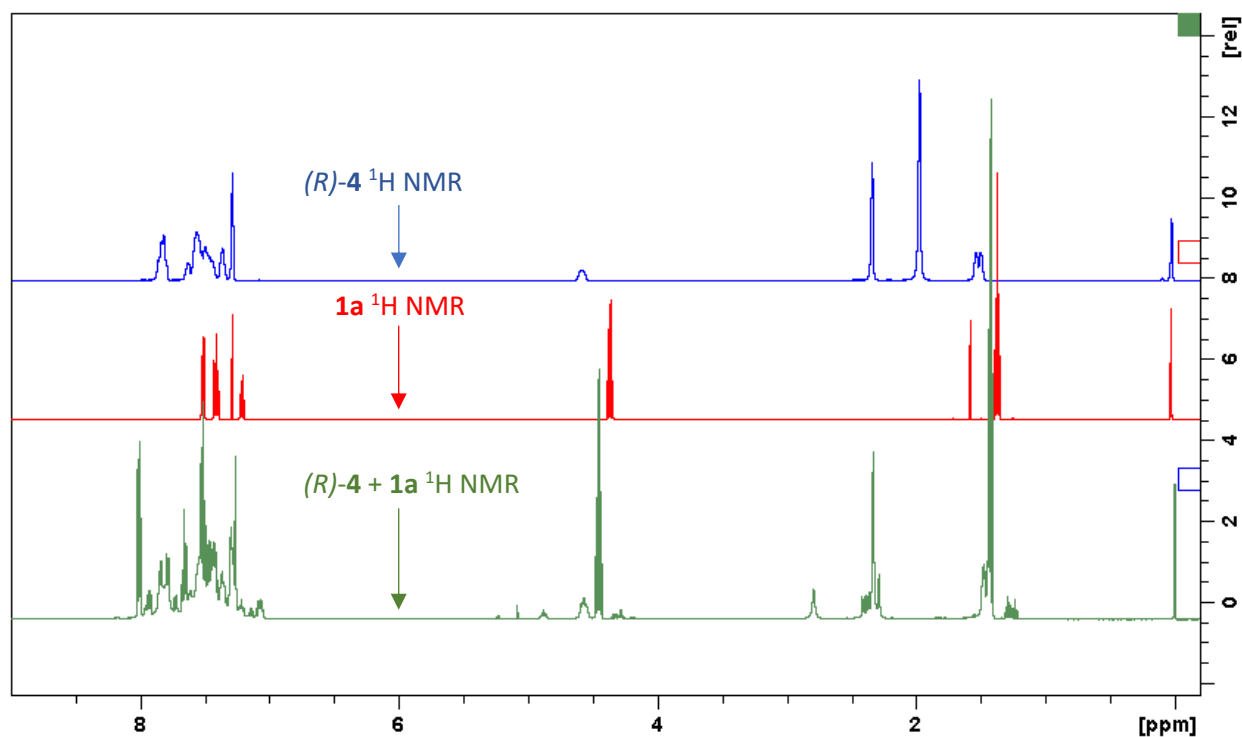

Full spectra

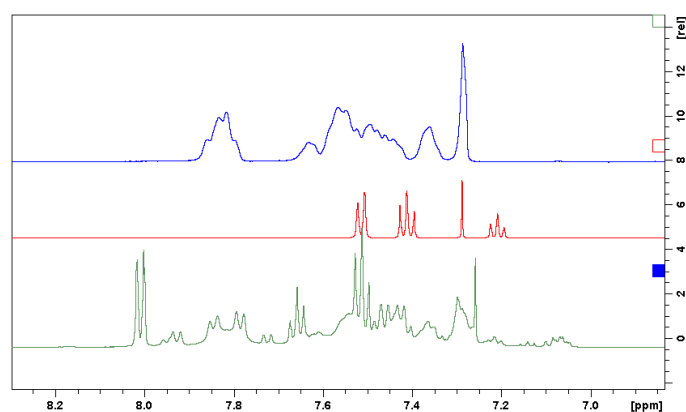

Aromatic region

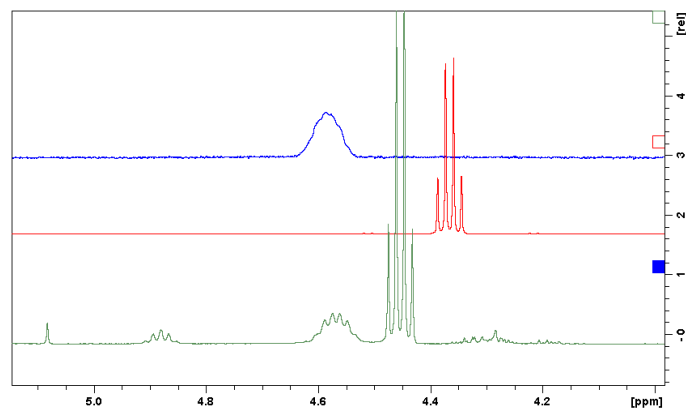

Aliphatic region

**Figure S2** Comparison of the  $^{13}\text{C}\{^1\text{H}\}$  NMR (101 MHz,  $\text{CDCl}_3$ ) spectra of (*R*)-**4** (blue), **1a** (red) and coordination experiment 1 (green).

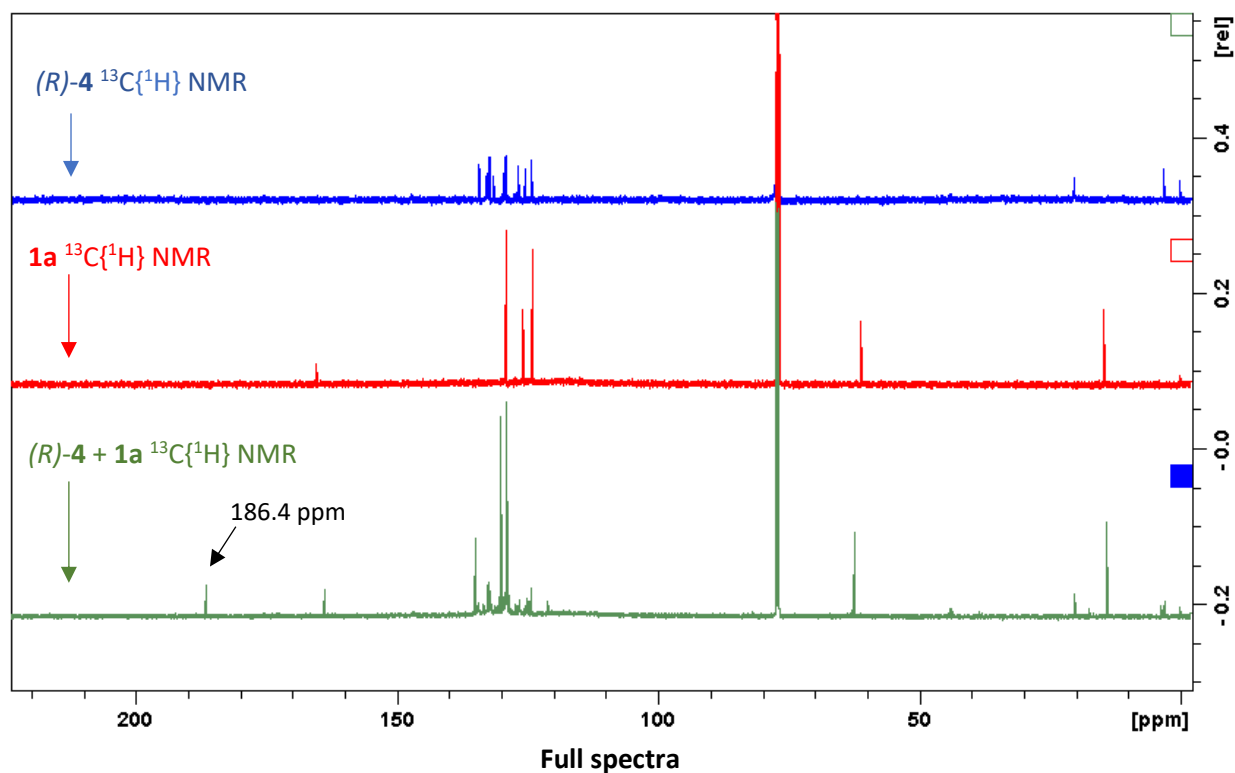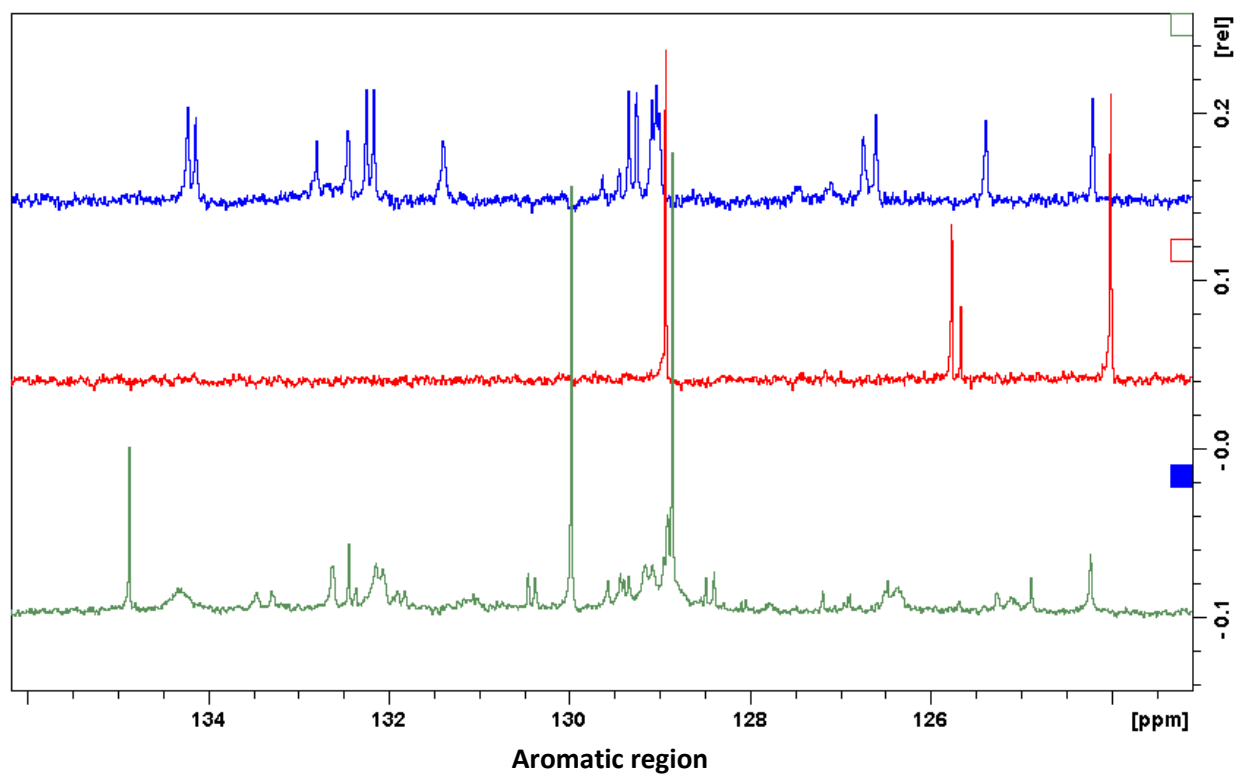

**Figure S3** Comparison of the  $^{31}\text{P}\{^1\text{H}\}$  NMR (162 MHz,  $\text{CDCl}_3$ ) spectra of (*R*)-**4** (blue) and coordination experiment 1 (green).

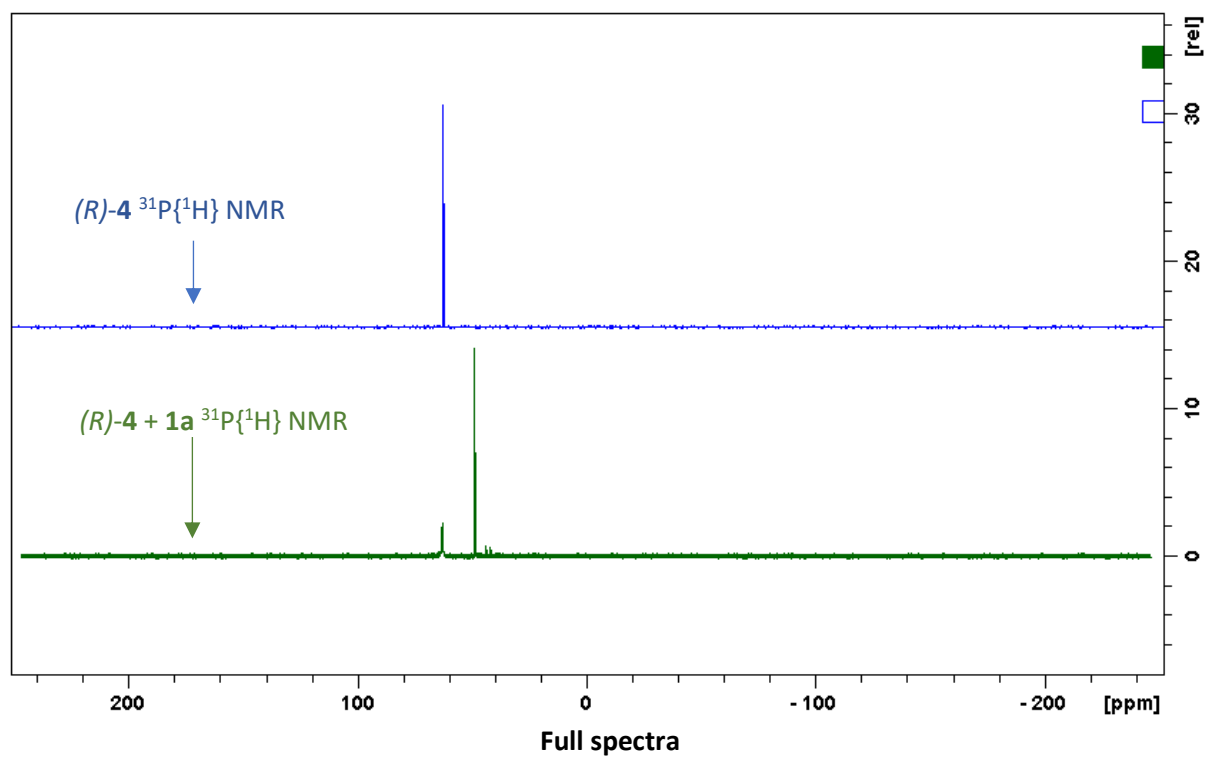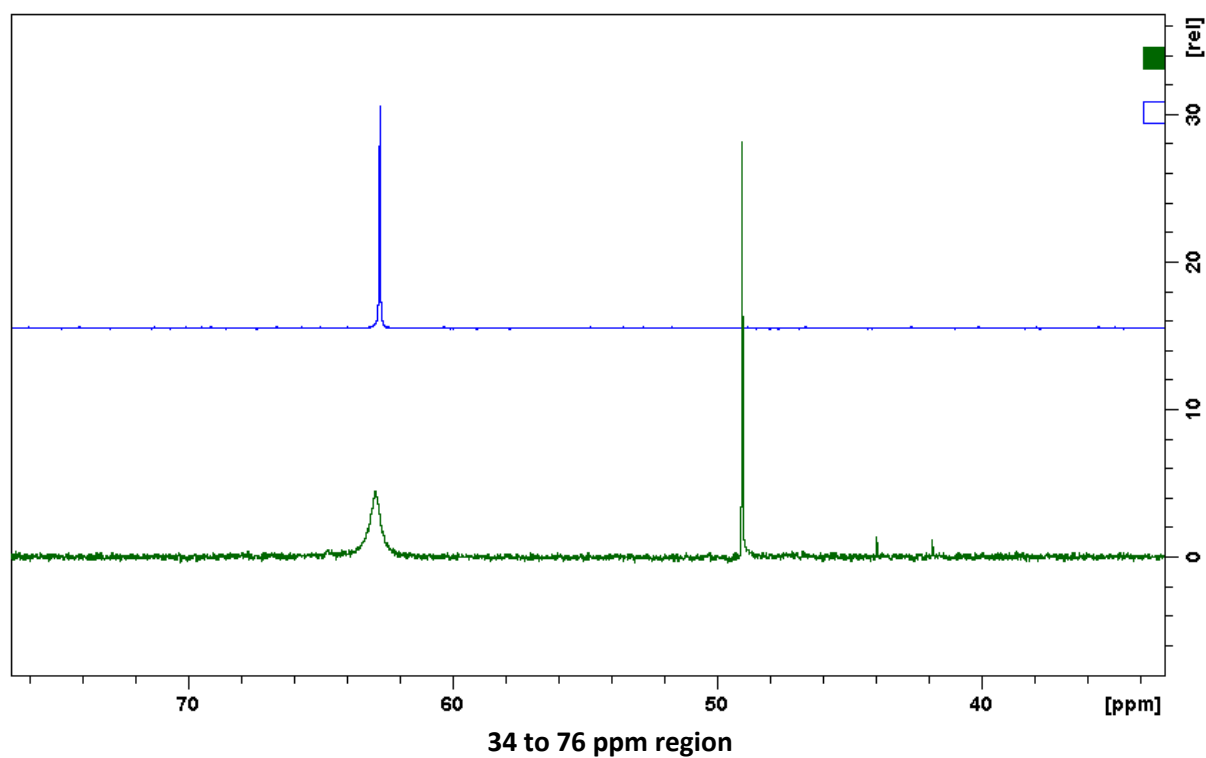

In coordination experiment 1 established the interaction between (*R*)-**4** and **1a**. New chemical peaks appeared in both the  $^1\text{H}$ ,  $^{13}\text{C}\{^1\text{H}\}$  and  $^{31}\text{P}\{^1\text{H}\}$  NMR spectra after mixing the reactants in stoichiometric amount. Unfortunately, we were unable to fully characterize any exact structure based on these measurements; however, some general considerations have been made. Diazo compounds are known to develop various coordination modes to transition metals:<sup>4-9</sup>

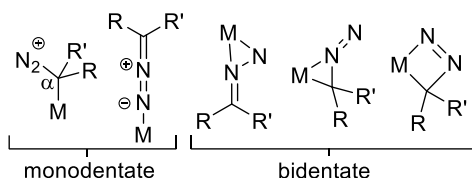

Among these structures, the monodentate coordination to the metal center via the  $\alpha$ -carbon is well established, as the first step of metal carbene synthesis from diazo compounds.<sup>10-12</sup> Upon coordination, the  $\alpha$ -carbon becomes highly electron-deficient in this species due to electron donation to the metal center. In the  $^{13}\text{C}\{^1\text{H}\}$  ( $\text{CDCl}_3$ ) NMR spectrum of coordination experiment 1, a new singlet peak can be detected in the low field region at  $\delta$  186.4 ppm after substrate addition. This peak also indicates the presence of an electron-deficient carbon. This observation supports the plausible mono-coordination of the  $\alpha$ -carbon to the palladium.

#### Coordination experiment 2:

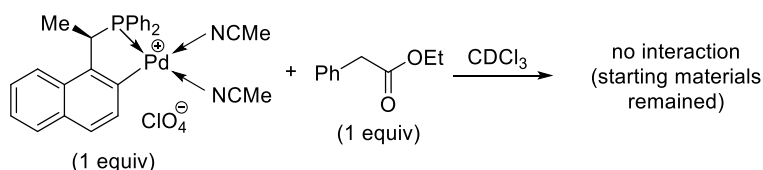

In order to prove or exclude any possible interaction between the diazoester's oxygen atom and the palladium, we performed control experiment 2 by mixing stoichiometric amount of (*R*)-**4** and ethyl phenylacetate. In this case, we did not observe any interaction between the reactants.

**Figure S4** Comparison of the  $^1\text{H}$  NMR (400 MHz,  $\text{CDCl}_3$ ) spectra of (*R*)-**4** (blue), ethyl phenylacetate (red) and coordination experiment 2 (green).

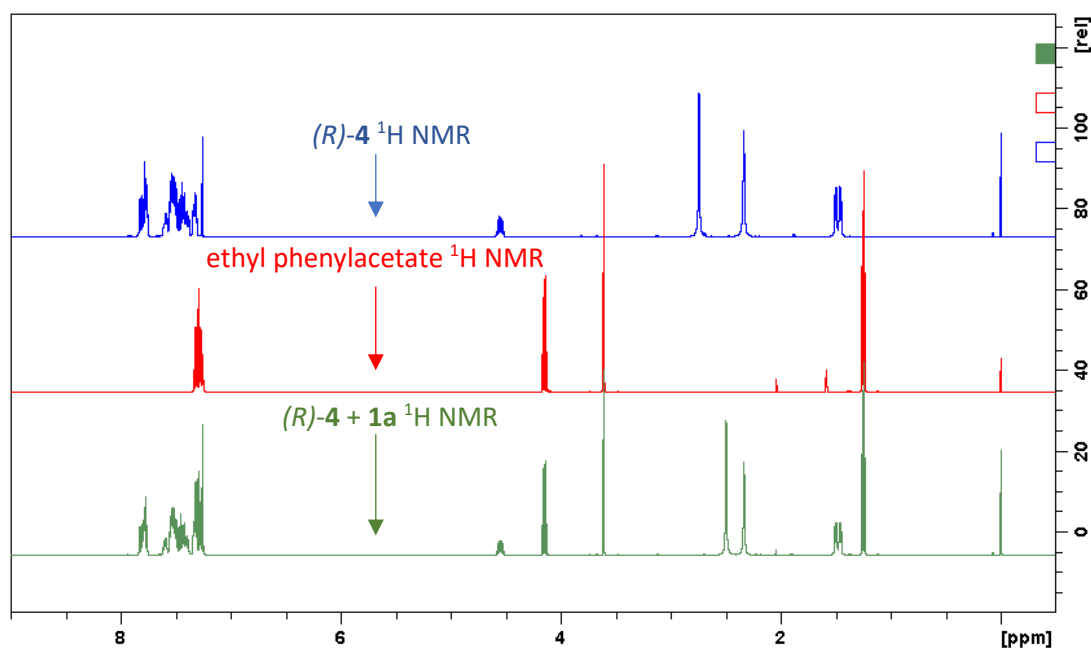



**Figure S5** Comparison of the  $^{13}\text{C}\{^1\text{H}\}$  NMR (101 MHz,  $\text{CDCl}_3$ ) spectra of (*R*)-**4** (blue), ethyl phenylacetate (red) and coordination experiment 2 (green).

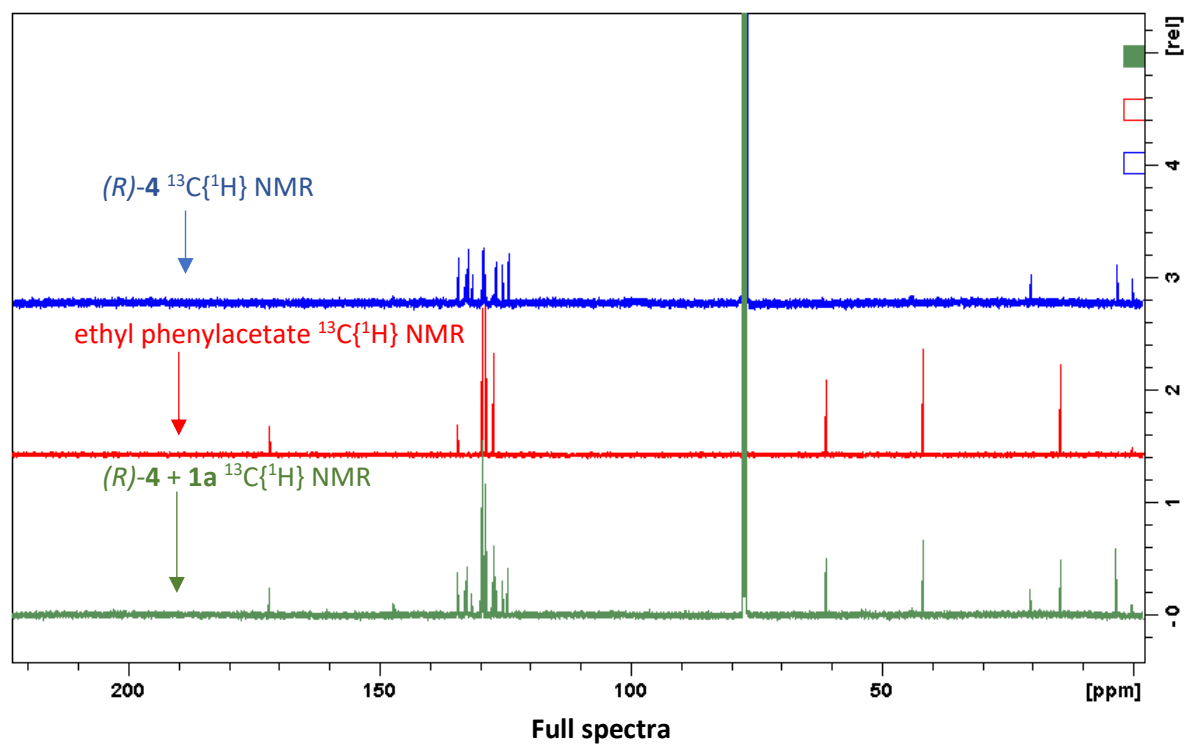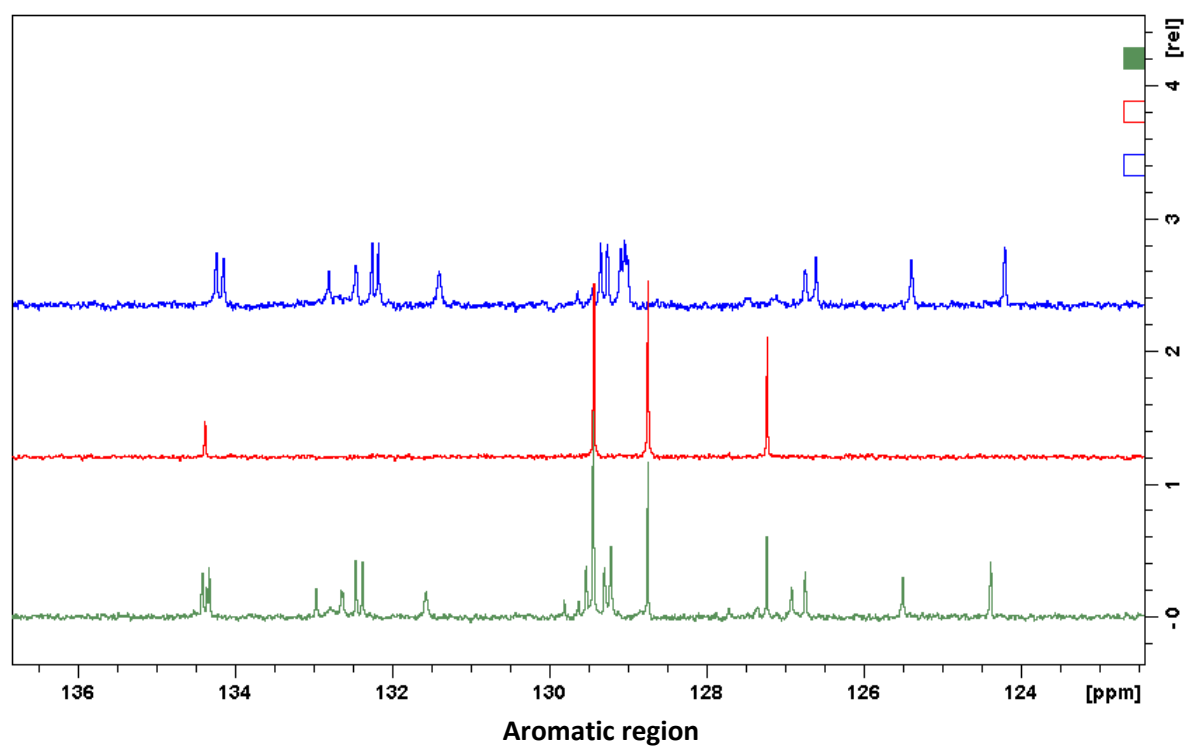

### Coordination experiment 3:

To gain more information on the substrate's coordination mode in the presence of phosphines, further control experiments were performed:

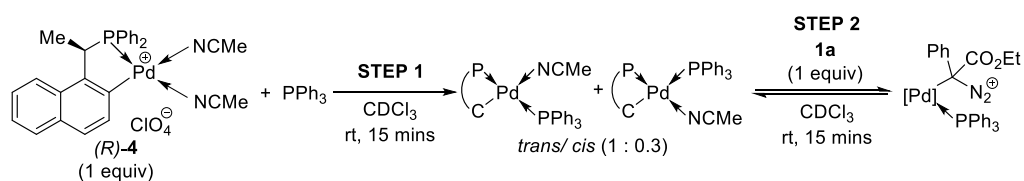

#### STEP 1:

For this coordination study, triphenylphosphine was used to replace the secondary phosphine, to avoid any product formation and to allow us to examine the coordinating properties. In the first step, stoichiometric amount of palladacycle was mixed with triphenylphosphine at room temperature, then multi nuclei NMR spectra were recorded after 15 minutes.

Figure S6 <sup>1</sup>H NMR (500 MHz, CDCl<sub>3</sub>) spectrum of STEP 1.

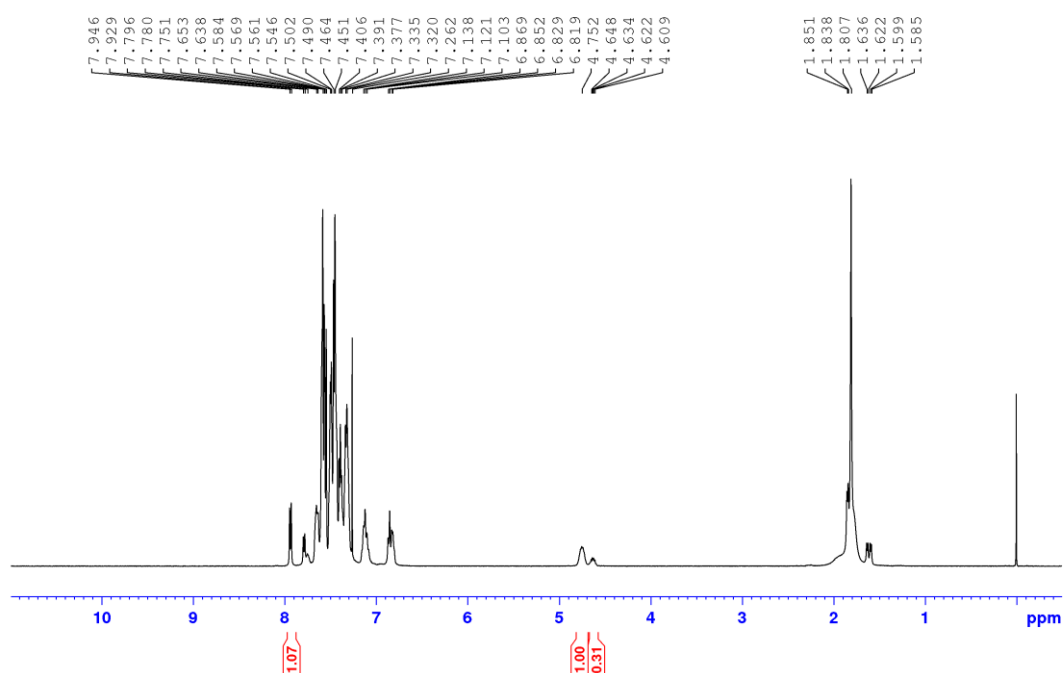

**Figure S7**  $^{13}\text{C}\{^1\text{H}\}$  NMR (126 MHz,  $\text{CDCl}_3$ ) spectrum of **STEP 1**.

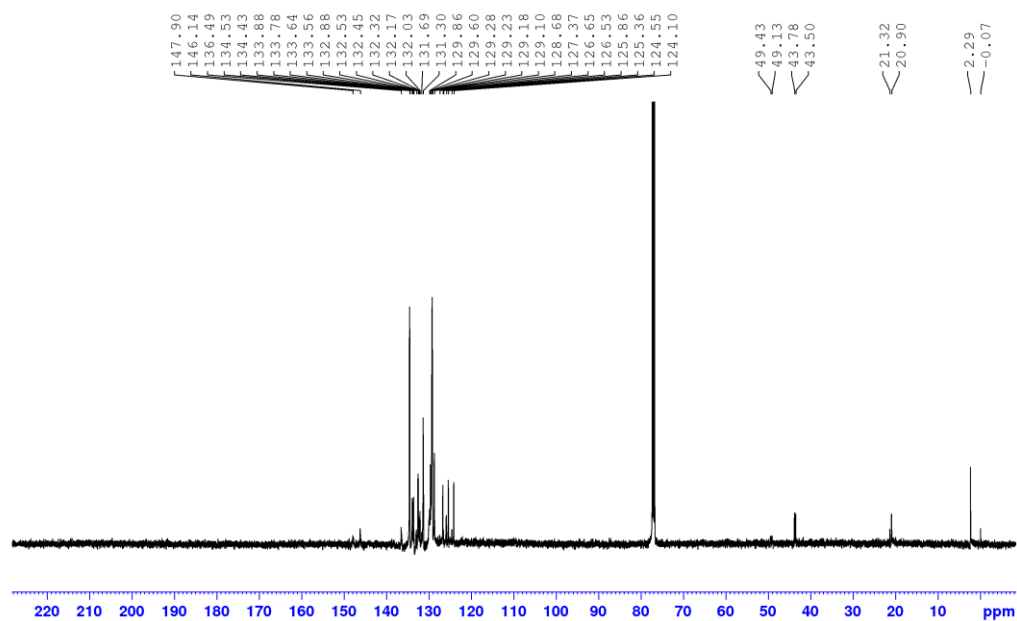

**Figure S8**  $^{31}\text{P}\{^1\text{H}\}$  NMR (162 MHz,  $\text{CDCl}_3$ ) spectrum of **STEP 1**.

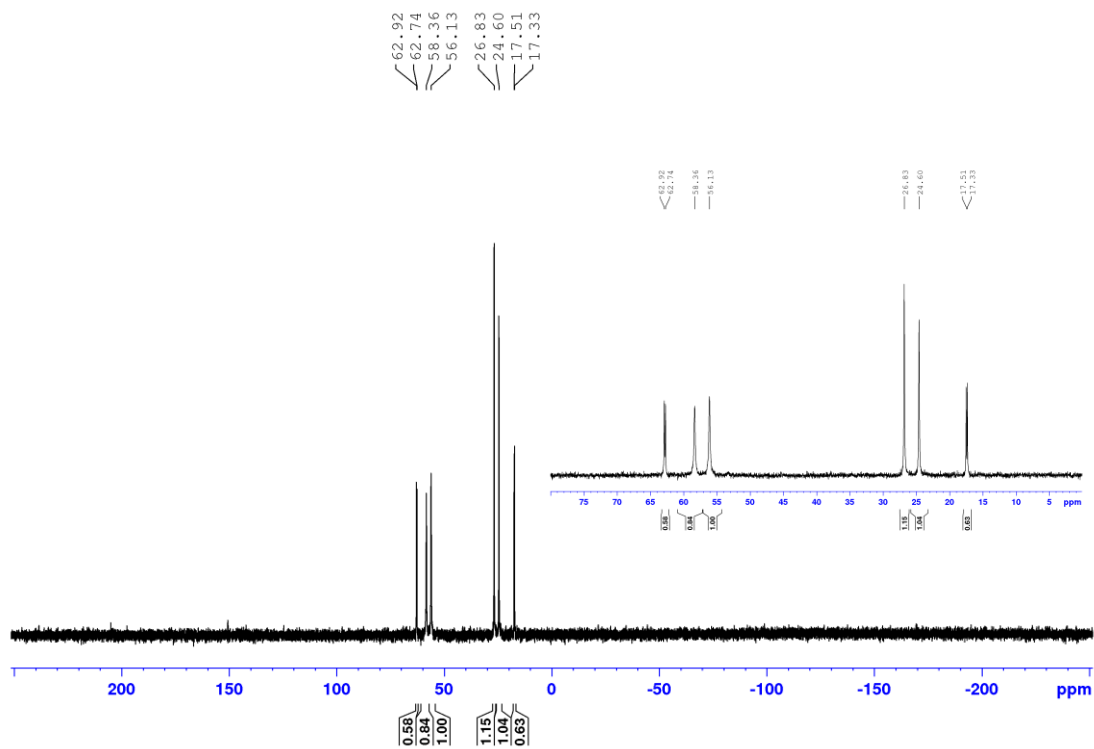

At this stage, the recorded  $^{31}\text{P}\{^1\text{H}\}$  ( $\text{CDCl}_3$ ) NMR spectrum shows two pairs of doublets, which are consistent to the formation of two isomers, compound **A** and **B** in 1 to 0.3 ratio. Significantly higher coupling constant ( $d$ ,  $J_{\text{PP}(\text{trans})}=361.5$  Hz) belongs to the *trans* P-Pd-P moiety in compound **A** (at  $\delta$  57.25 and 25.72 ppm), compared to the *cis* P-Pd-P fragment ( $d$ ,  $J_{\text{PP}(\text{cis})}=29$  Hz) in case of compound **B** (at  $\delta$  62.83 and 17.42 ppm). The observed ratio of the generated complexes indicates that the coordination of the triphenylphosphine to the *cis* position is less favorable compared to *trans* to the palladacycle's phosphorus atom. This phenomenon is consistent to our previous studies on the stereoelectronic properties of the CP palladacycle complex, which established that the aromatic carbon donor of the metallacycle induces a significantly stronger *trans*-influence than the phosphorus atom.<sup>13</sup> Due to the significant electron withdrawing effect of the aromatic ring, the d-orbitals of the palladium are less available for backdonation in *trans* position to the carbon donor. The weaker backdonation indicates more labile ligand coordination to this site. This feature is important in our proposed mechanism.

## STEP 2

In the second step of our control experiment, equivalent amount of  $\alpha$ -diazoacetate was introduced to the same reaction mixture, followed by the spectroscopic measurements after 15 minutes stirring:

**Figure S9**  $^1\text{H}$  NMR (400 MHz,  $\text{CDCl}_3$ ) spectrum of **STEP 2**.

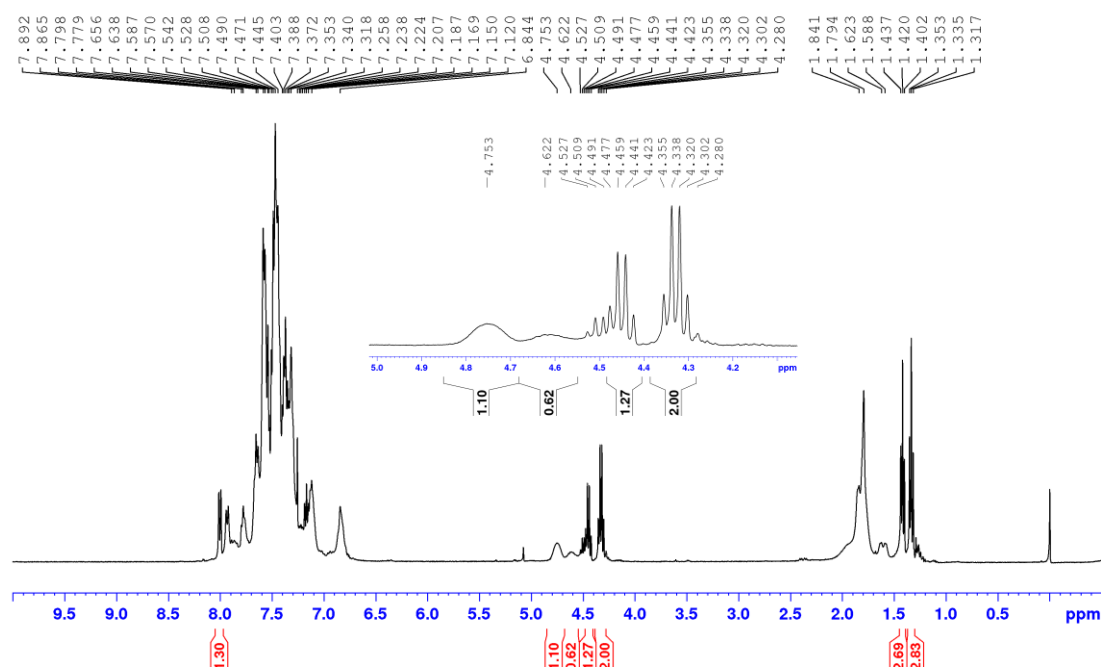

**Figure S10**  $^{13}\text{C}\{^1\text{H}\}$  NMR (101 MHz,  $\text{CDCl}_3$ ) spectrum of **STEP 2**.

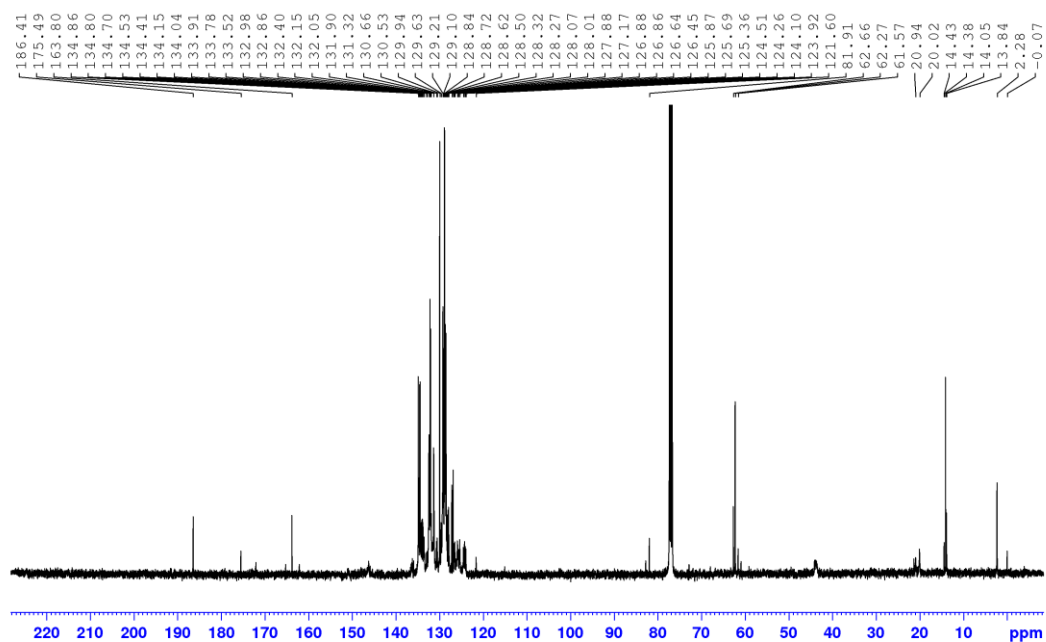

**Figure S11**  $^{31}\text{P}\{^1\text{H}\}$  NMR (162 MHz,  $\text{CDCl}_3$ ) spectrum of **STEP 2**.

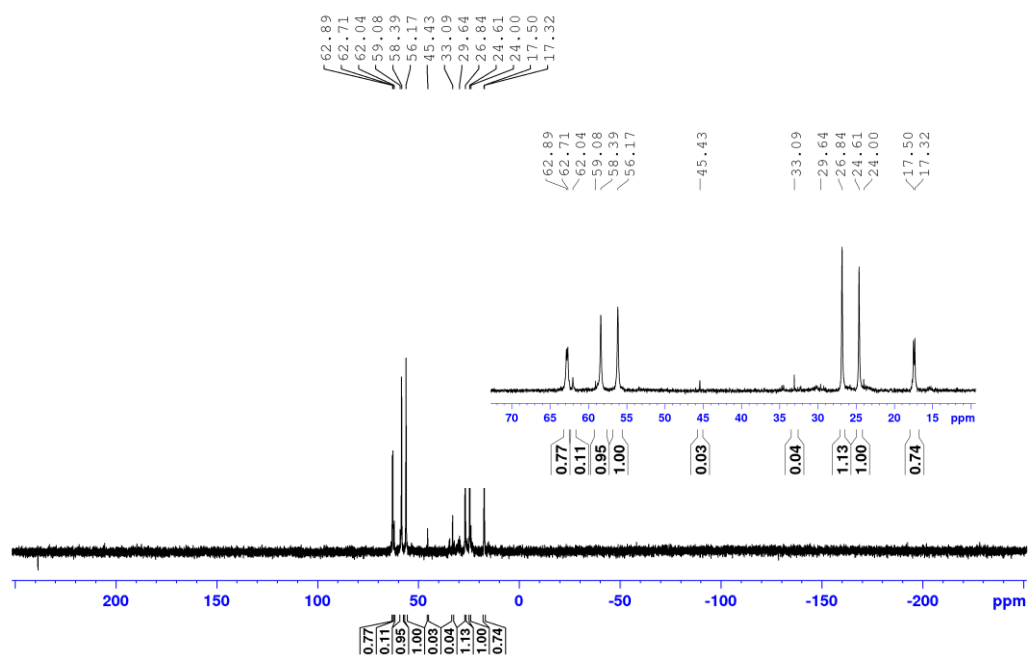

NMR spectroscopic measurements revealed that interactions between the diazo substrate and the complexes arose, just as we have seen it in the first coordination study. In the  $^{13}\text{C}\{^1\text{H}\}$  ( $\text{CDCl}_3$ ) NMR spectrum, the singlet carbon peak in the low field (at  $\delta$  186.4 ppm) was detected again, as in the previous experiment. In this case, we predict only *trans* coordination to the aromatic carbon donor, due to the labile ligand interaction at this position. The diazo substrate's coordination properties are not strong enough to replace the coordinated phosphines in the *cis* position to the carbon donor. The recorded  $^{31}\text{P}\{^1\text{H}\}$  ( $\text{CDCl}_3$ ) NMR spectrum at this stage shows similar chemical peak pattern as we observed in the first step of this experiment (STEP 1); however, a few new minor peaks arose upon the diazoester addition. This suggests the formation of new species in the reaction mixture; however, the small intensity indicates continuous coordination-decoordination between the diazo acetate and the palladium complexes. Bidentate substrate coordination in this case can be excluded, due to the single coordination site available at one time around the metal center.

The special electronic features of the palladacycle is one of the reasons why we did not observe any nitrogen molecule elimination from the diazoester. As we have mentioned above, the diazo compounds tend to coordinate to transition metals via the  $\alpha$ -carbon to generate metal carbene species via nitrogen elimination. In the Fisher type metal carbenes, the  $\text{sp}^2$ -hybridized carbenic carbon donates  $\sigma$  electrons to the vacant d-orbital of the metal and at the same time,  $\pi$ -backdonation takes place from the metal's d-orbital to the available p-orbital of the carbon. Since the CP-ligand scaffold of the applied palladacycle catalyst ((*R*)-**4**) develops significant backdonation from the palladium to both of the phosphorus and the aromatic carbon donor, the d-orbitals of the metal are much less available for backdonation to the coordinating diazosubstrate. This is one of the reasons why the formation of metal carbene species was not observed in our case; however, further investigations are necessary to establish this statement.

#### Coordination experiment 4:

The first step of the proposed mechanism is the replacement of the coordinated acetonitrile molecules of complex **4** to secondary phosphines. In our proposed mechanism, intermediate **A** contains two molecules of phosphines coordinated to the metal center. To experimentally prove the existence of intermediate **A**, the following coordination experiment was performed:

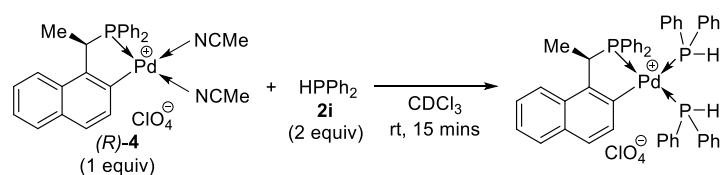

In this experiment, 1 equivalent of **4** was mixed with 2 equivalents of **2i** at room temperature in chloroform. After 15 minutes, multi-nuclei NMR spectra were recorded (Figures S12 to S14). By analyzing the  $^{31}\text{P}\{^1\text{H}\}$  NMR spectrum of the experiment (Figure S14), it can be clearly seen that all the diphenylphosphine molecules took part in the coordination, which is supported by the absence of the non-coordinated diphenylphosphine chemical peak at -40 ppm. The chemical peak at 59.5 ppm belongs to the phosphorus of the bidentate ligand scaffold (integration value: 1) and the chemical peaks at -7.4 ppm (integration value: 2) support the coordination of the phosphine compounds to the palladium. The observed broad peaks and the absence of P-P coupling represent labile ligand coordination.

**Figure S12**  $^1\text{H}$  NMR (400 MHz,  $\text{CDCl}_3$ ) spectrum of coordination experiment 4.

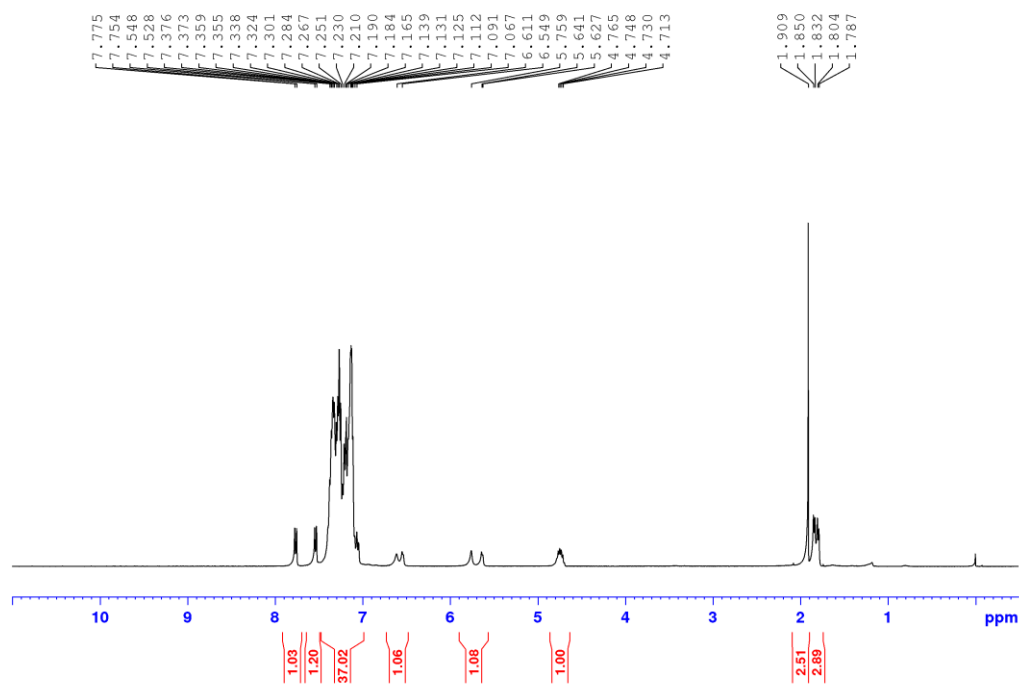

**Figure S13**  $^{13}\text{C}\{^1\text{H}\}$  NMR (101 MHz,  $\text{CDCl}_3$ ) spectrum of coordination experiment 4.

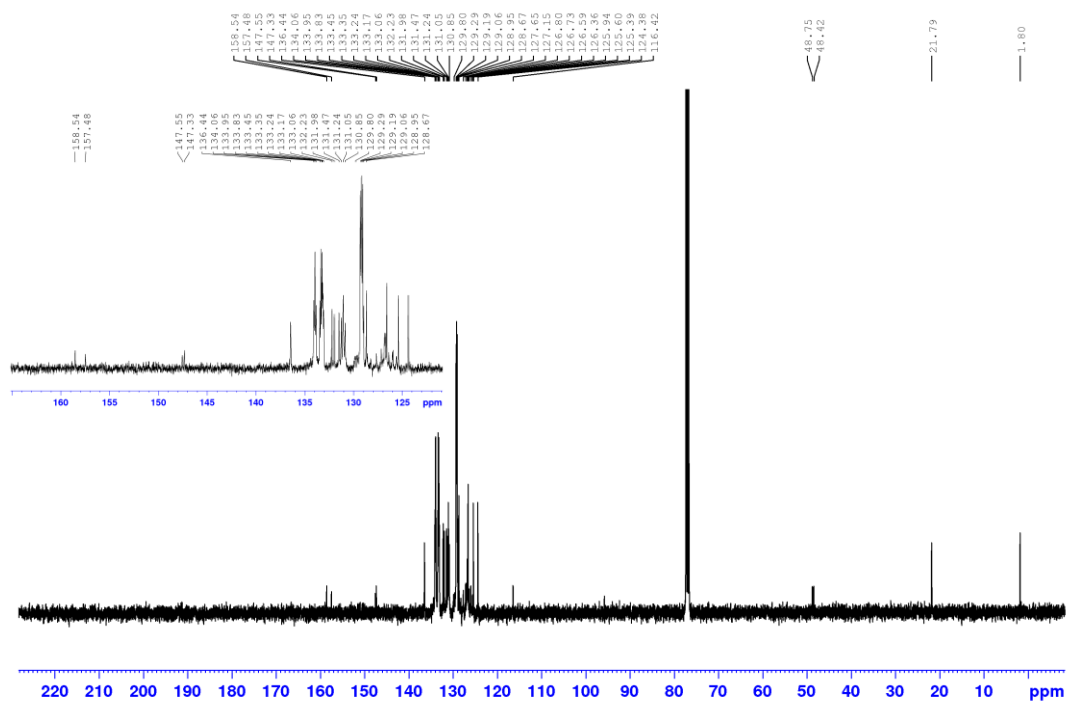

**Figure S14**  $^{31}\text{P}\{^1\text{H}\}$  NMR (162 MHz,  $\text{CDCl}_3$ ) spectrum of coordination experiment 4.

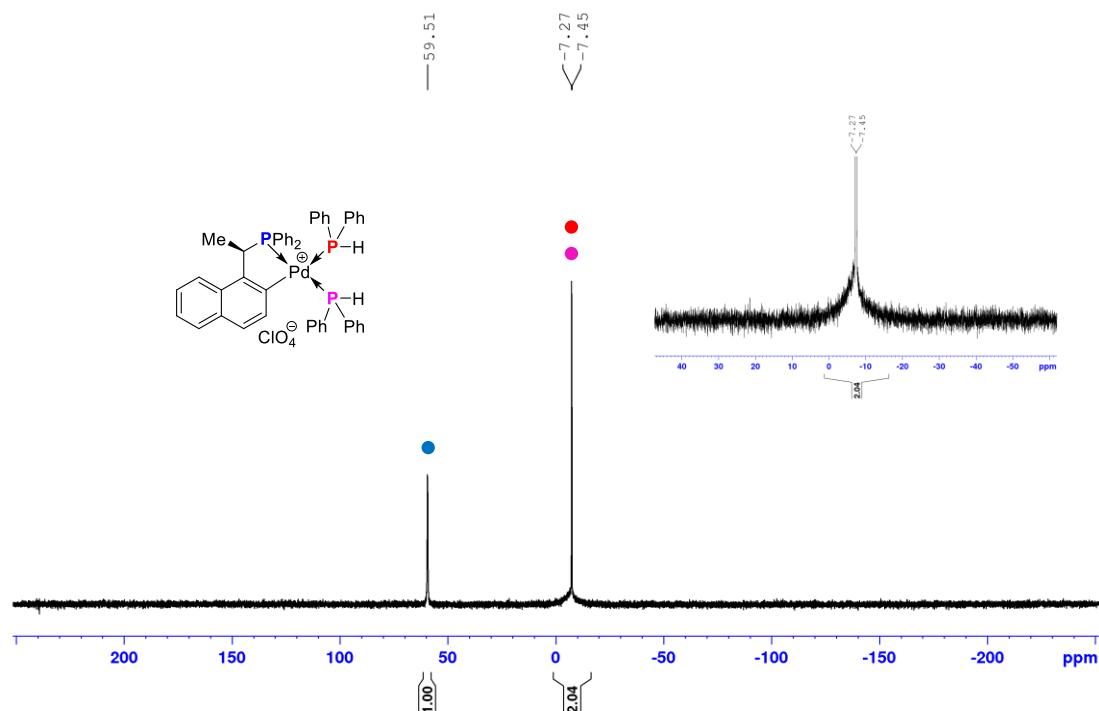

Considering all of the results of our control investigations, we have proposed a possible intramolecular mechanism for the diazoacetate phosphination:

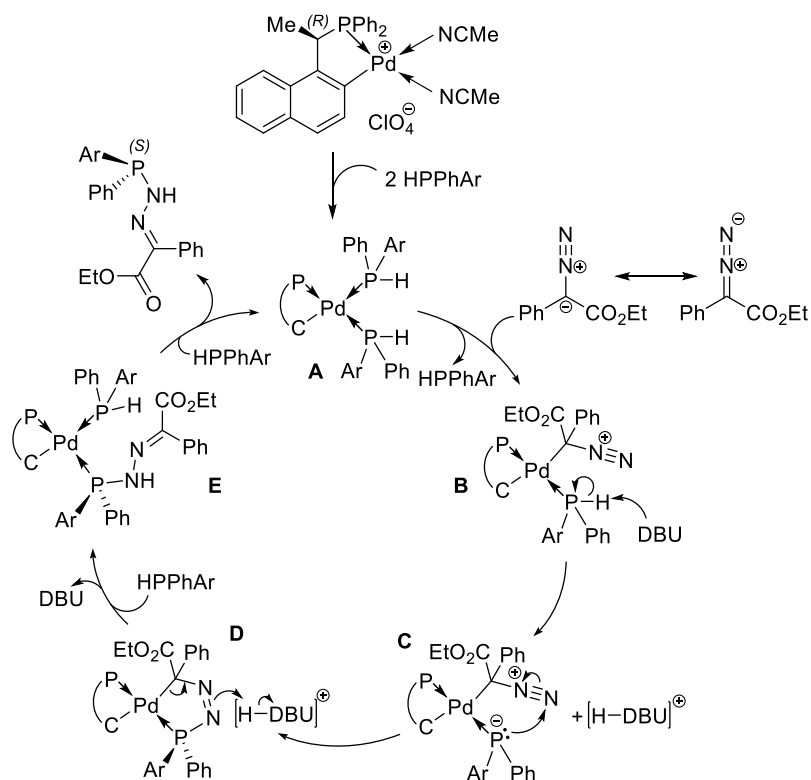



In the first step of the proposed mechanism, the secondary phosphines occupy the two available coordination sites around the palladium center (**A**). The next step is the coordination of the diazoester, followed by the deprotonation of the racemic secondary phosphine by external base to generate a prochiral phosphido species (**B**). Nucleophilic attack on the terminal nitrogen of the coordinated diazoester by the phosphide species (**C**) results in the formation of a five-member chelate to the palladium (**D**). Noteworthy to mention, that according to our previous findings, asymmetric hydrophosphinations of activated alkenes proceed via six-member ring at this stage of the catalytic cycle.<sup>1, 2</sup> Due to the rigid nature of the five-member ring, this can be an explanation why the phosphination of the diazoacetates are significantly slower compared to the alkene substrates. In the last step of the catalytic cycle, a new set of diarylphosphines coordinate to palladium causing the elimination of the final product and regeneration of the active catalyst (**E** to **A**).

### 3. NMR spectra

Figure S15  $^1\text{H}$  NMR (400 MHz,  $\text{CDCl}_3$ ) spectrum of **2a**.

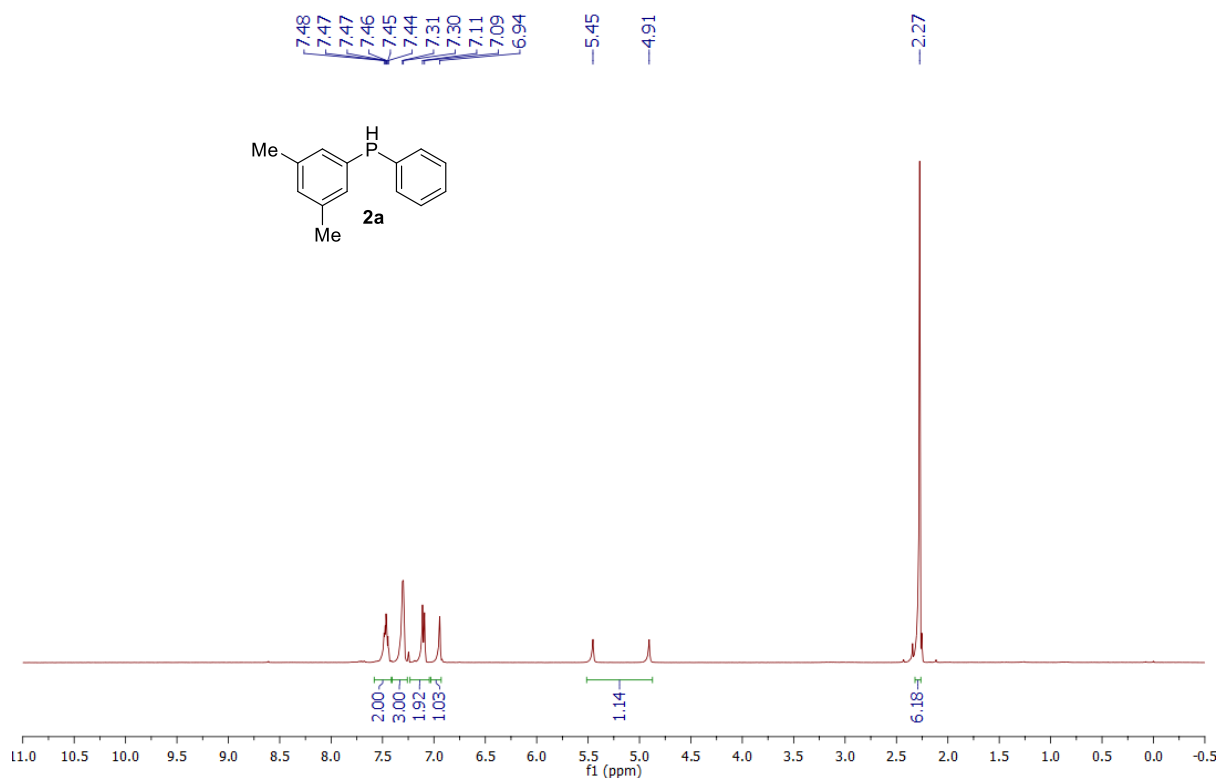

Figure S16  $^{13}\text{C}\{^1\text{H}\}$  NMR (101 MHz,  $\text{CDCl}_3$ ) spectrum of **2a**.

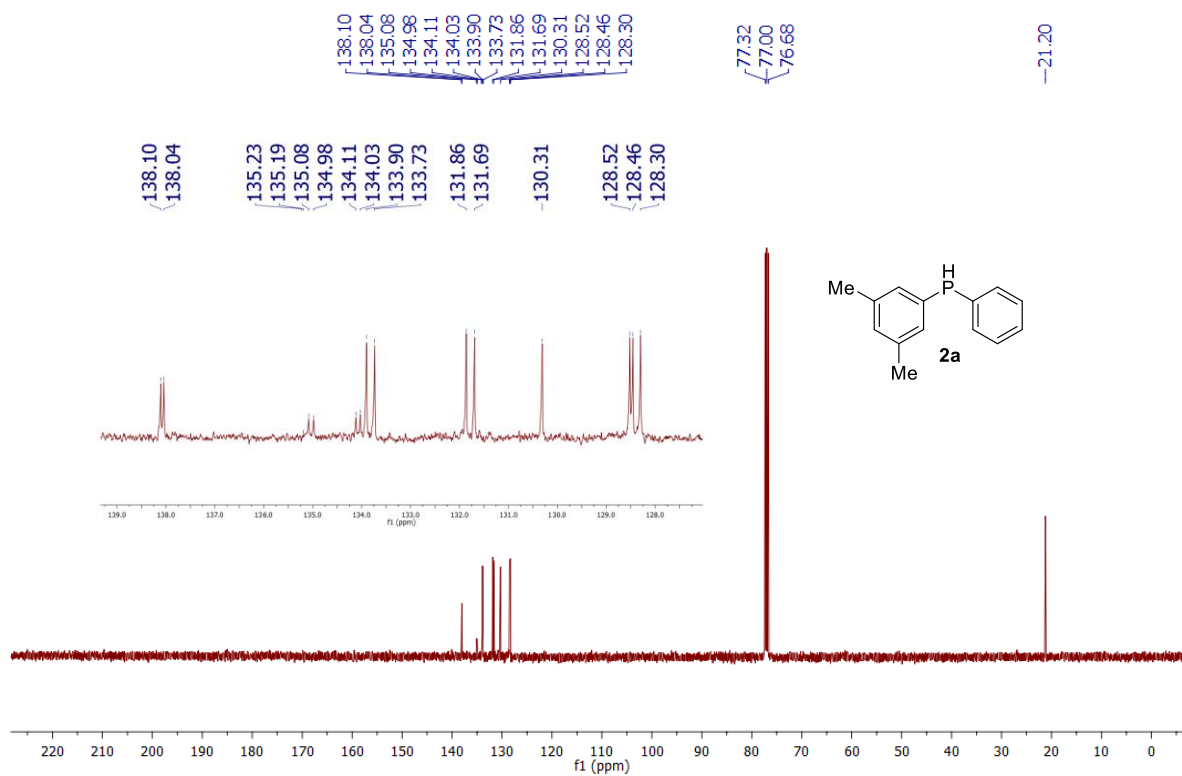

**Figure S17**  $^{31}\text{P}\{^1\text{H}\}$  NMR (162 MHz,  $\text{CDCl}_3$ ) spectrum of **2a**.

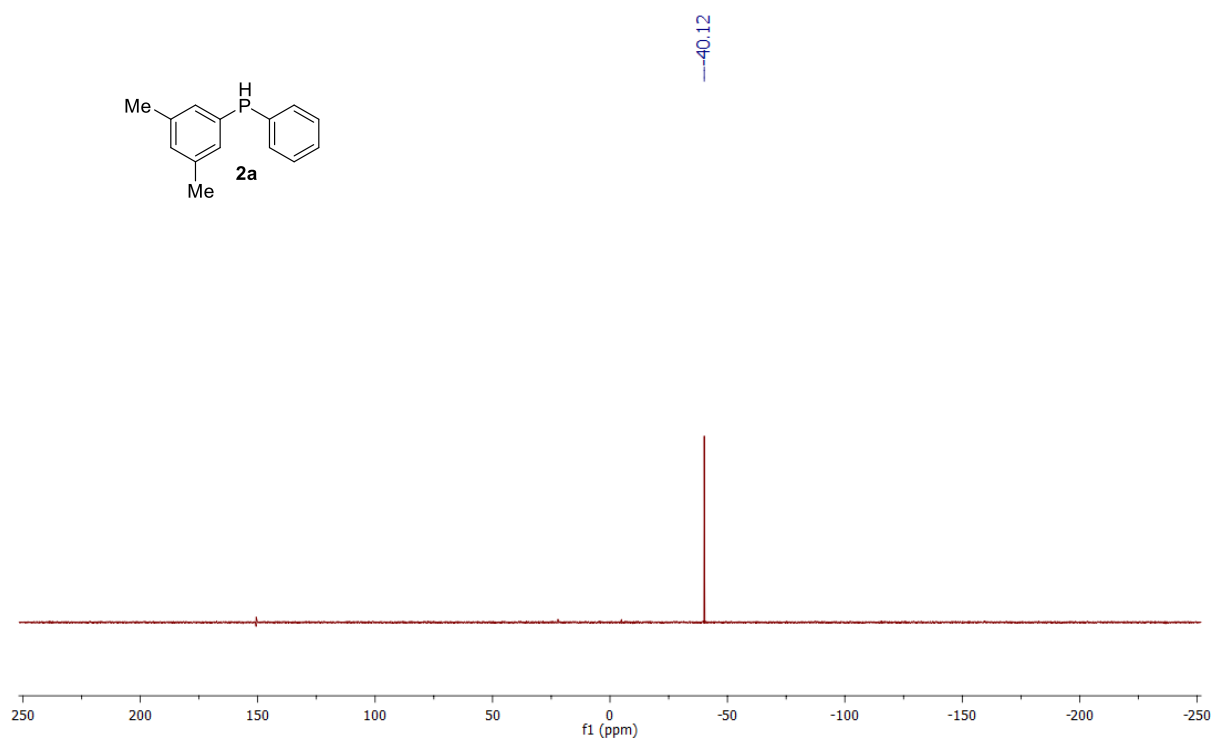

**Figure S18**  $^1\text{H}$  NMR (400 MHz,  $\text{CDCl}_3$ ) spectrum of **2b**.

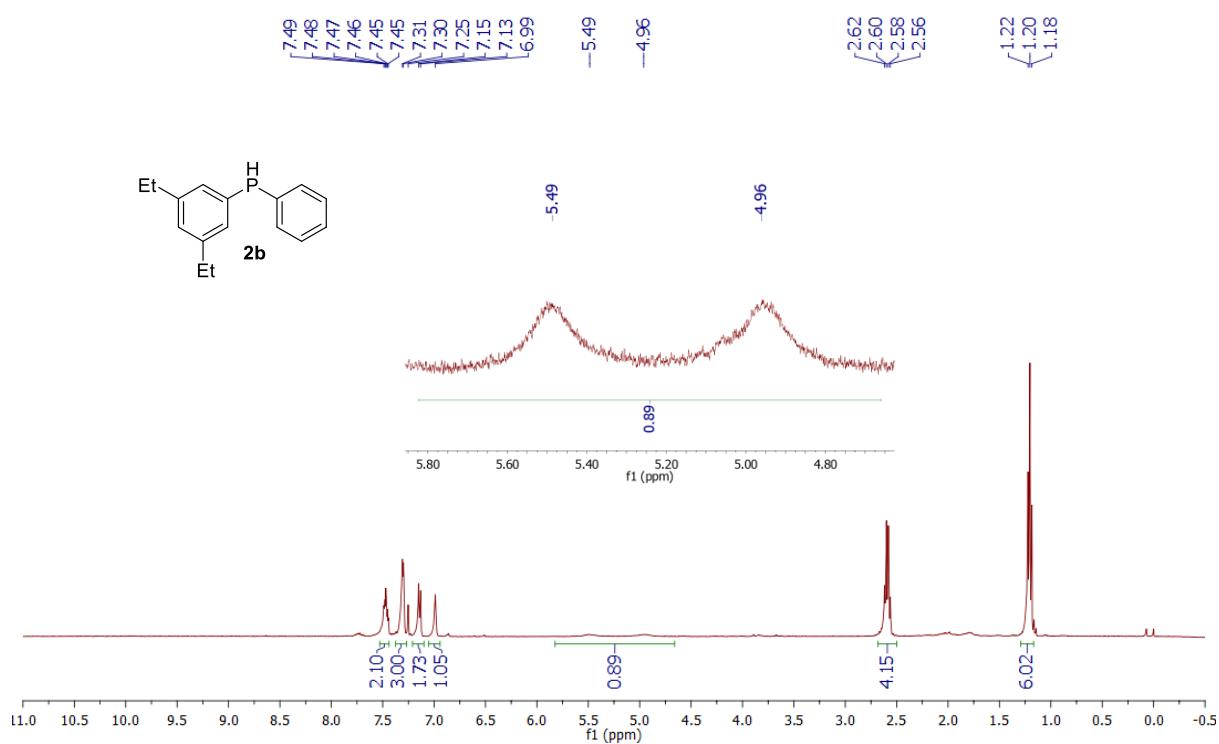

**Figure S19**  $^{13}\text{C}\{^1\text{H}\}$  NMR (101 MHz,  $\text{CDCl}_3$ ) spectrum of **2b**.

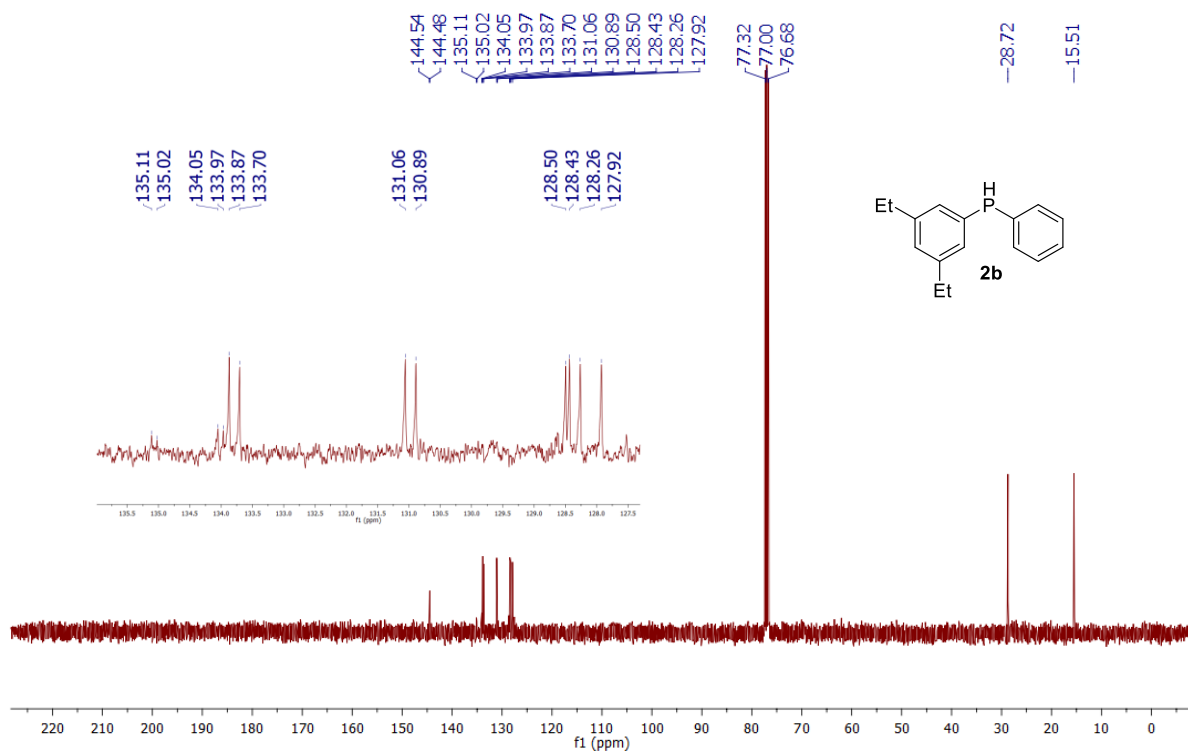

**Figure S20**  $^{31}\text{P}\{^1\text{H}\}$  NMR (162 MHz,  $\text{CDCl}_3$ ) spectrum of **2b**.

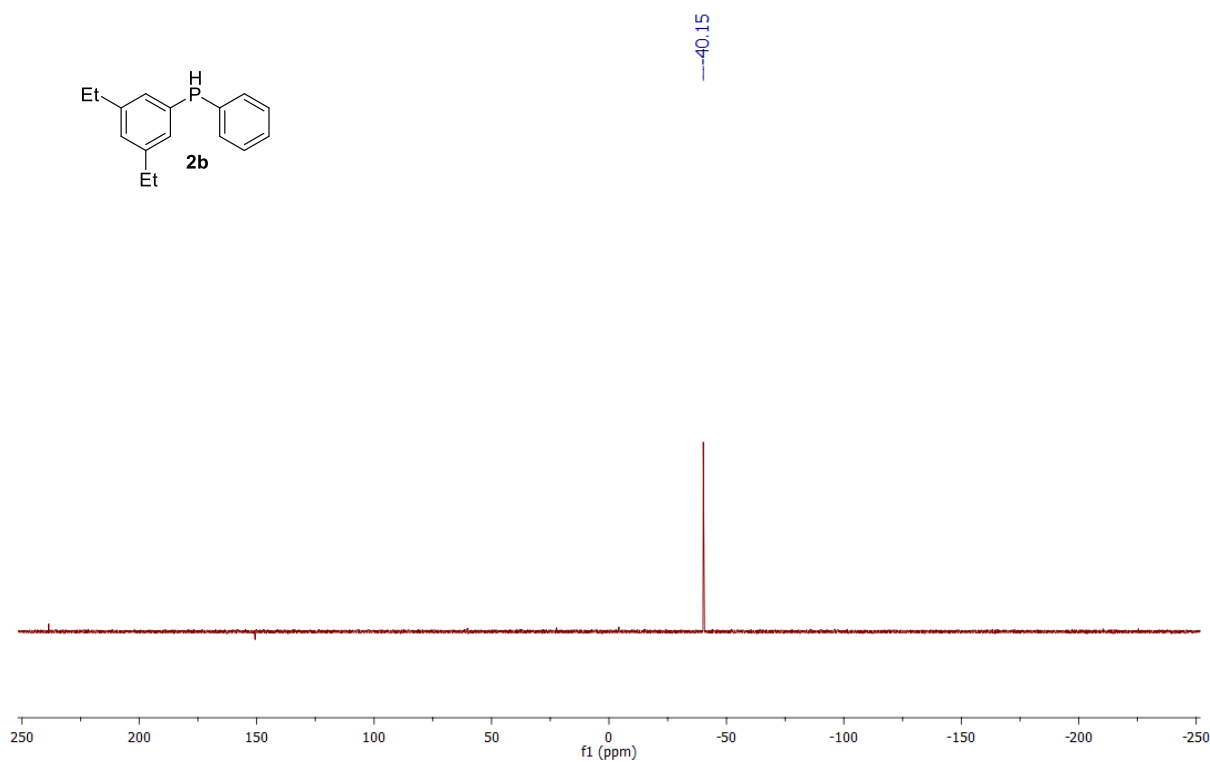

Figure S21  $^1\text{H}$  NMR (400 MHz,  $\text{CDCl}_3$ ) spectrum of **2c**.

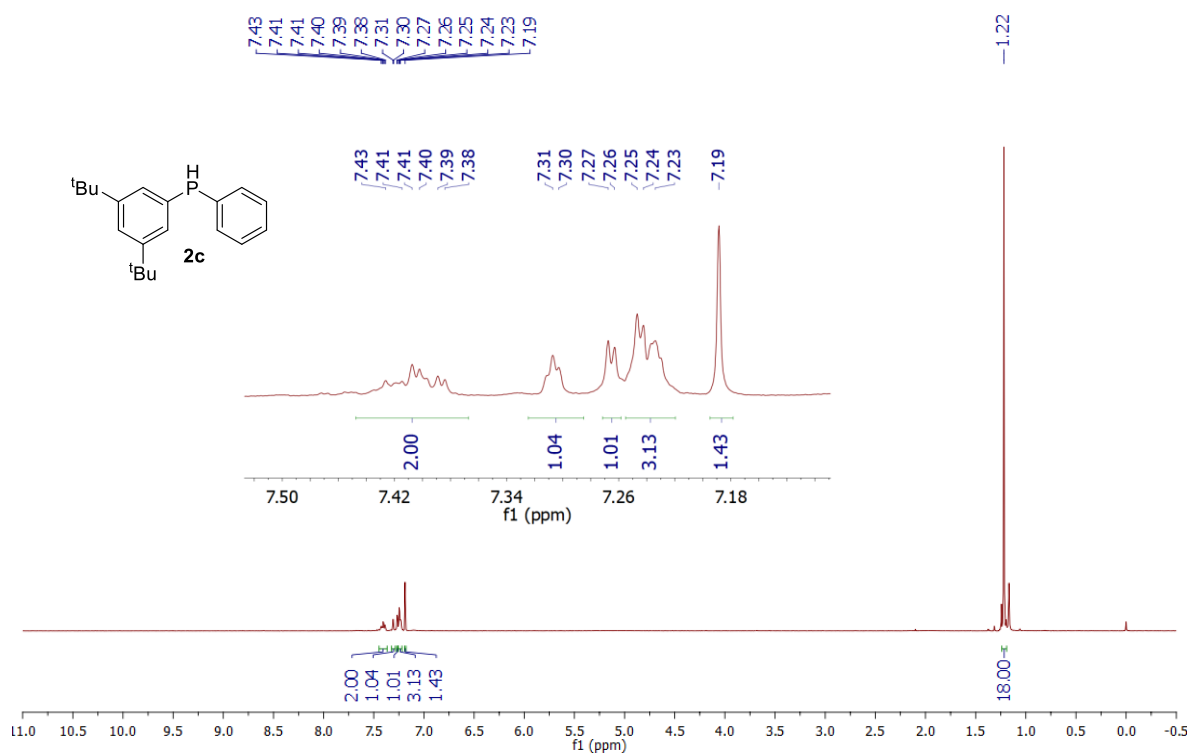

Figure S22  $^{13}\text{C}\{^1\text{H}\}$  NMR (75 MHz,  $\text{CDCl}_3$ ) spectrum of **2c**.

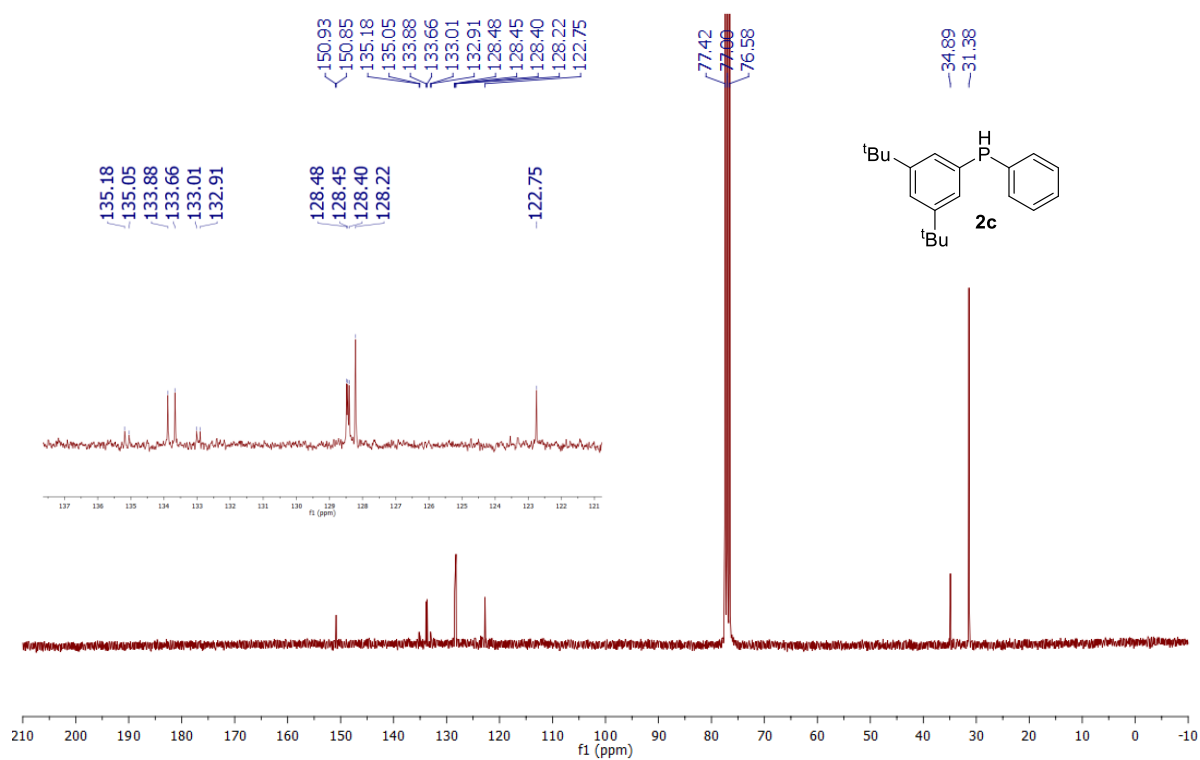

**Figure S23**  $^{31}\text{P}\{^1\text{H}\}$  NMR (162 MHz,  $\text{CDCl}_3$ ) spectrum of **2c**.

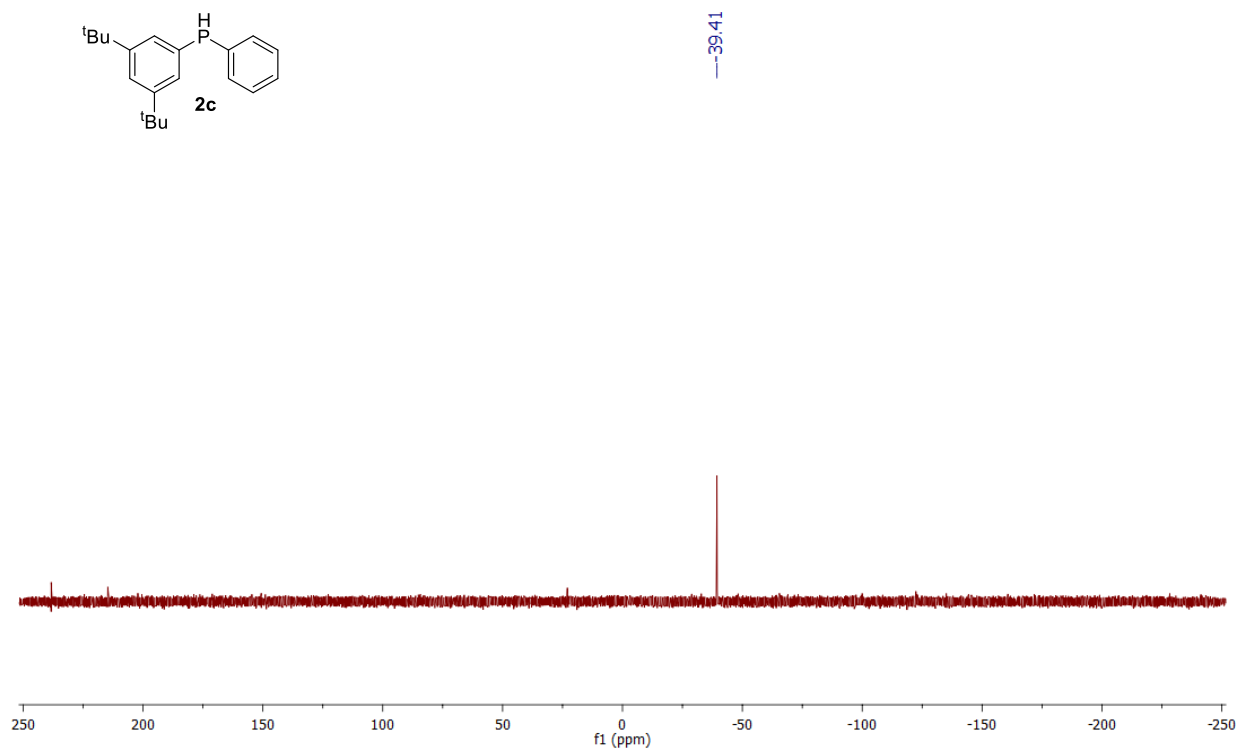

**Figure S24**  $^1\text{H}$  NMR (400 MHz,  $\text{CDCl}_3$ ) spectrum of **2d**.

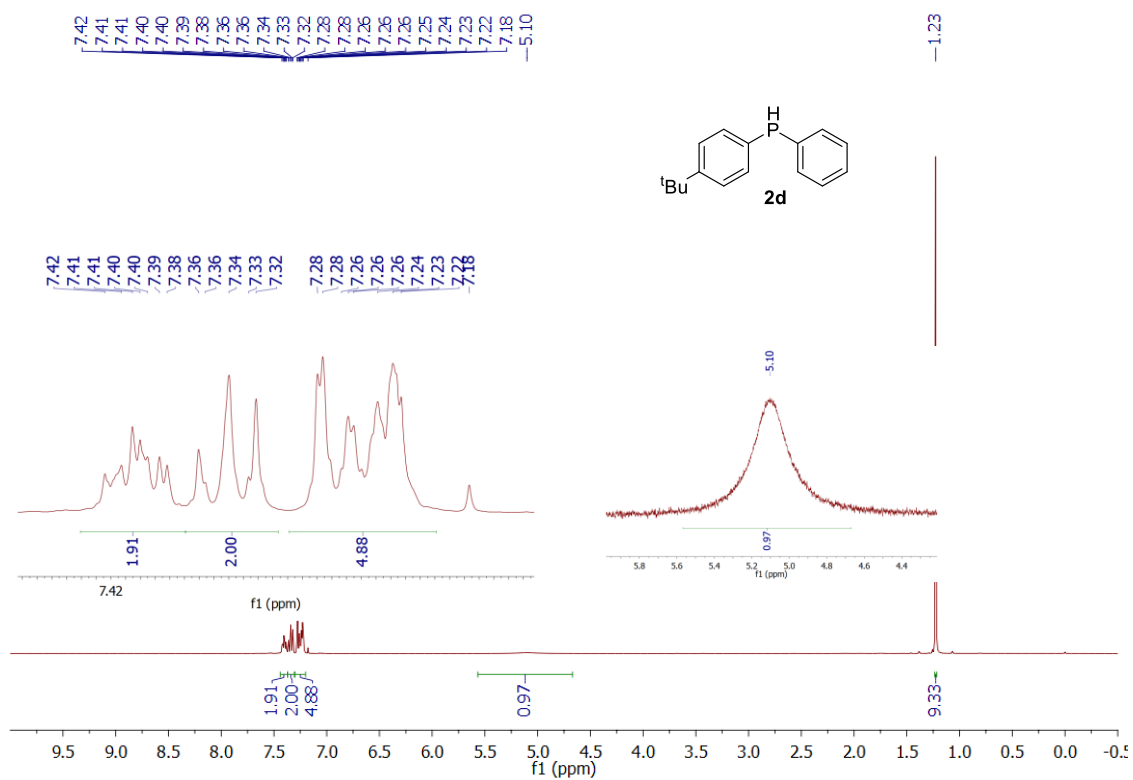

**Figure S25**  $^{13}\text{C}\{^1\text{H}\}$  NMR (101 MHz,  $\text{CDCl}_3$ ) spectrum of **2d**.

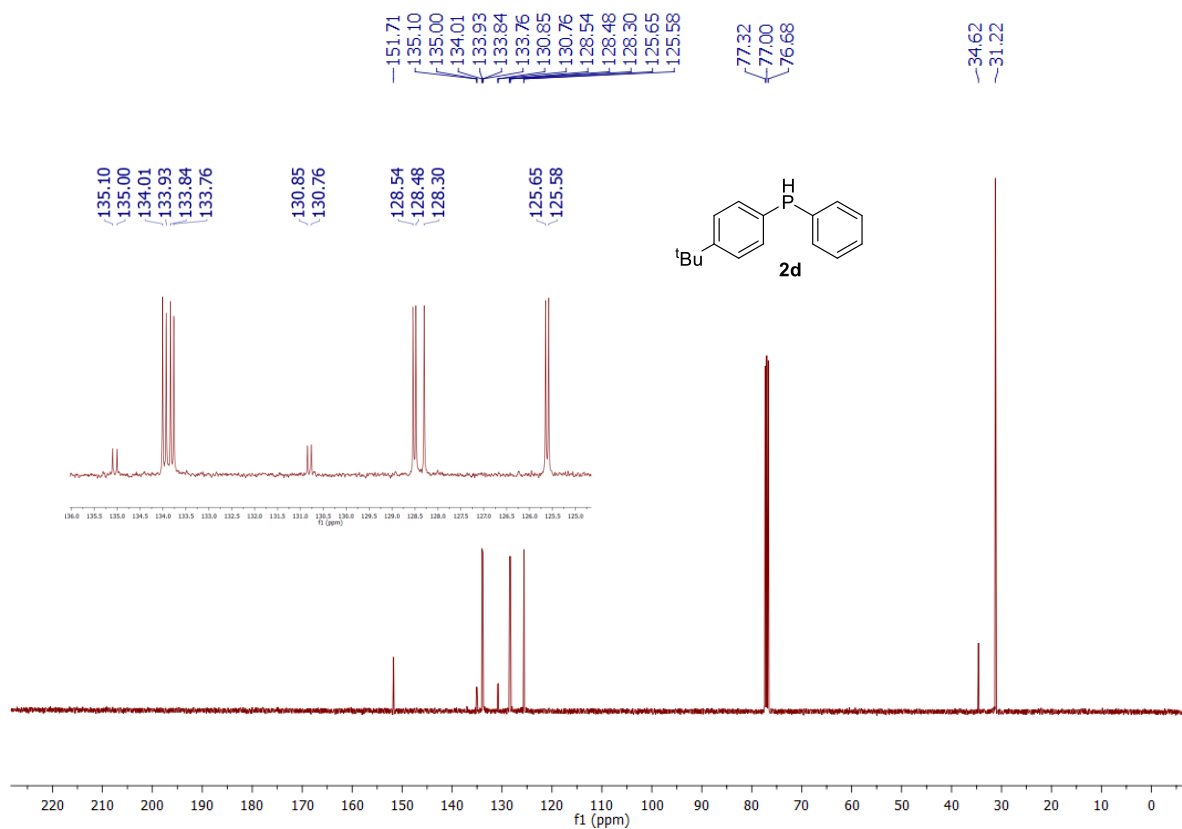

**Figure S26**  $^{31}\text{P}\{^1\text{H}\}$  NMR (162 MHz,  $\text{CDCl}_3$ ) spectrum of **2d**.

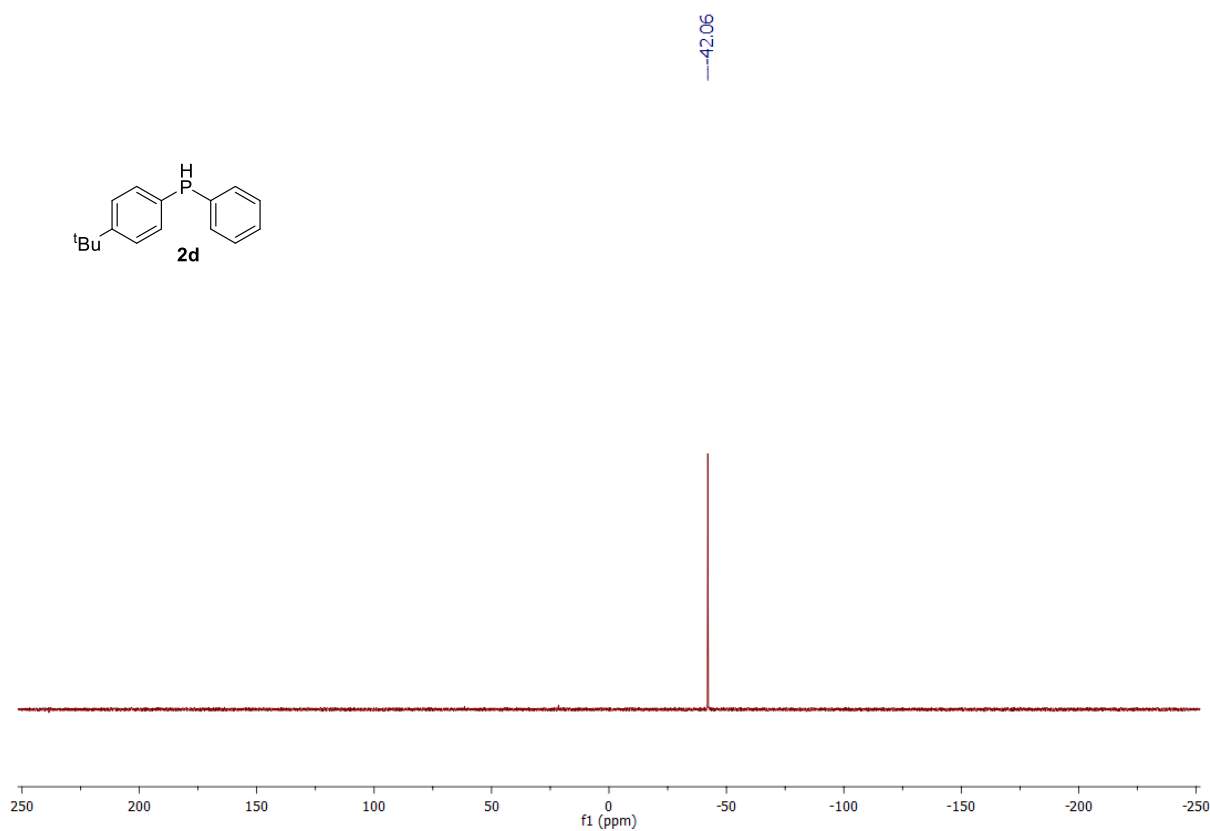

**Figure S27**  $^1\text{H}$  NMR (400 MHz,  $\text{CDCl}_3$ ) spectrum of **1b**.

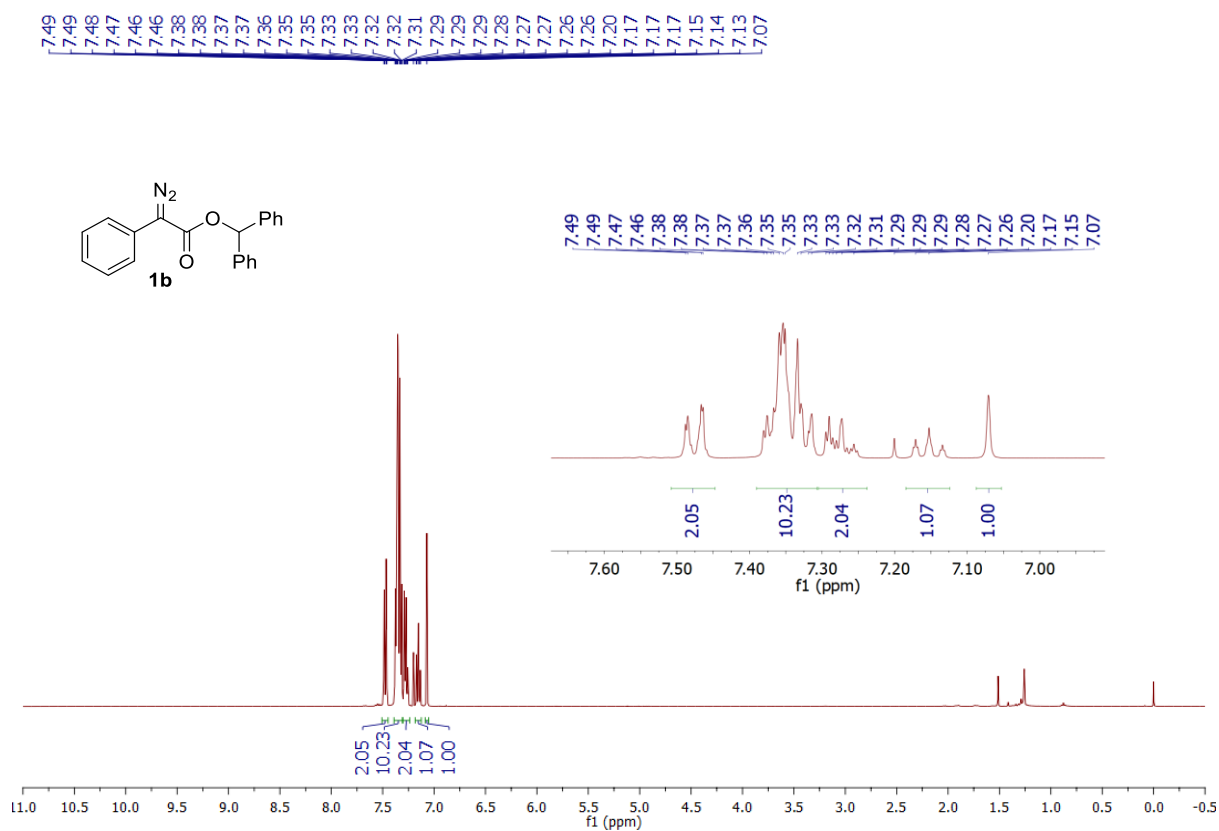

**Figure S28**  $^{13}\text{C}\{^1\text{H}\}$  NMR (101 MHz,  $\text{CDCl}_3$ ) spectrum of **1b**.

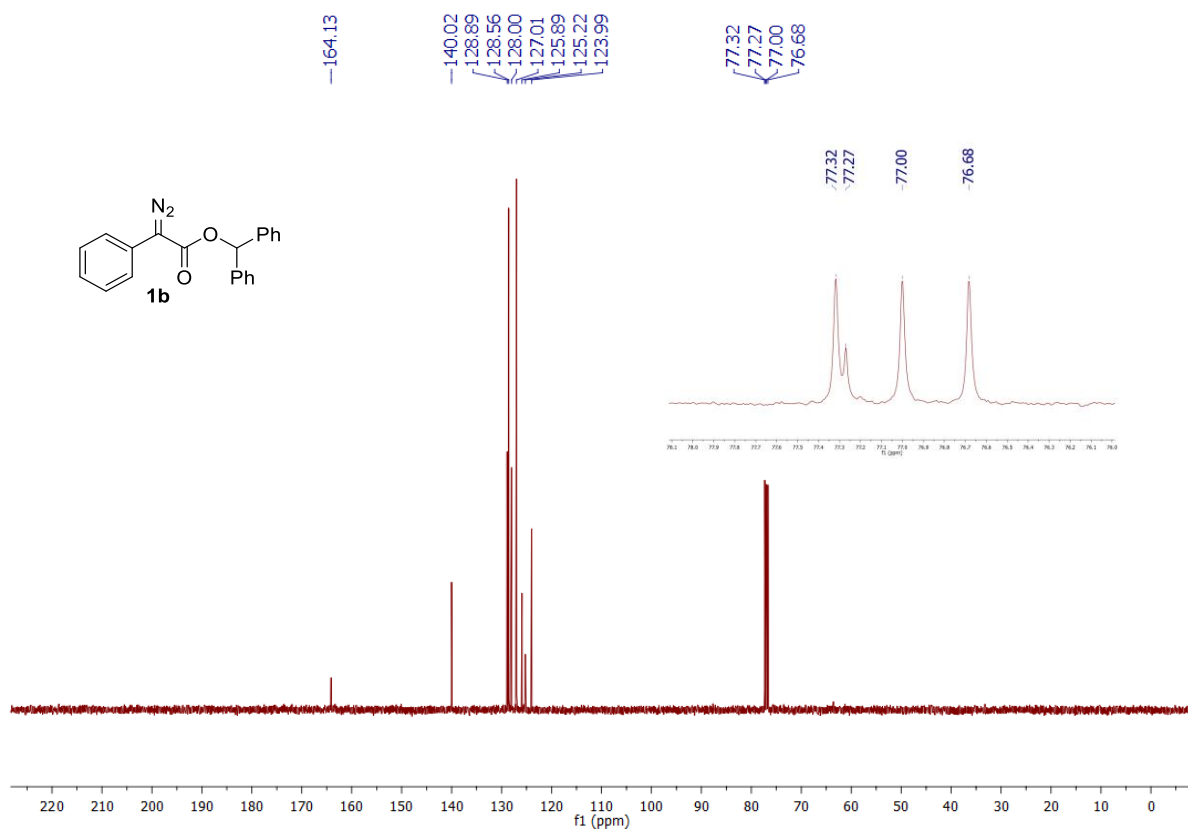



**Figure S29**  $^1\text{H}$  NMR (400 MHz,  $\text{CDCl}_3$ ) spectrum of **1d**.

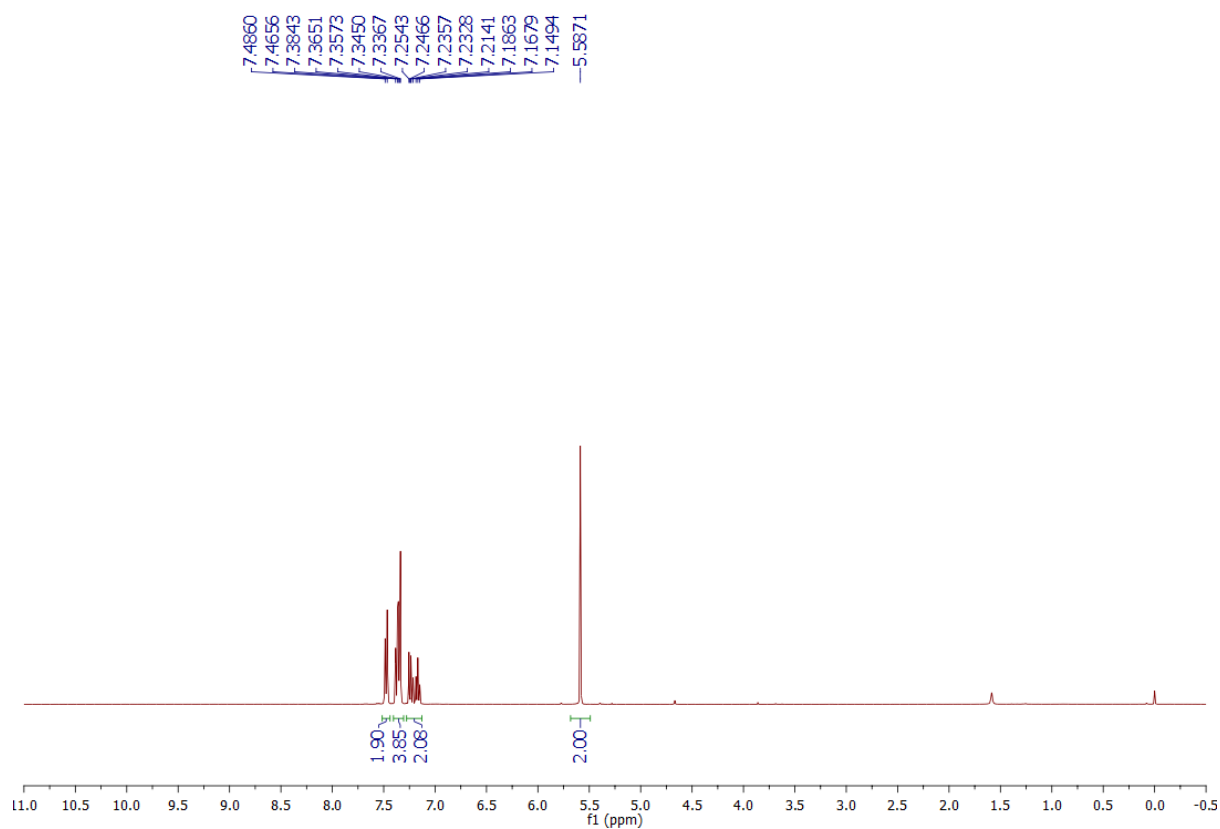

**Figure S30**  $^{13}\text{C}\{^1\text{H}\}$  NMR (101 MHz,  $\text{CDCl}_3$ ) spectrum of **1d**.

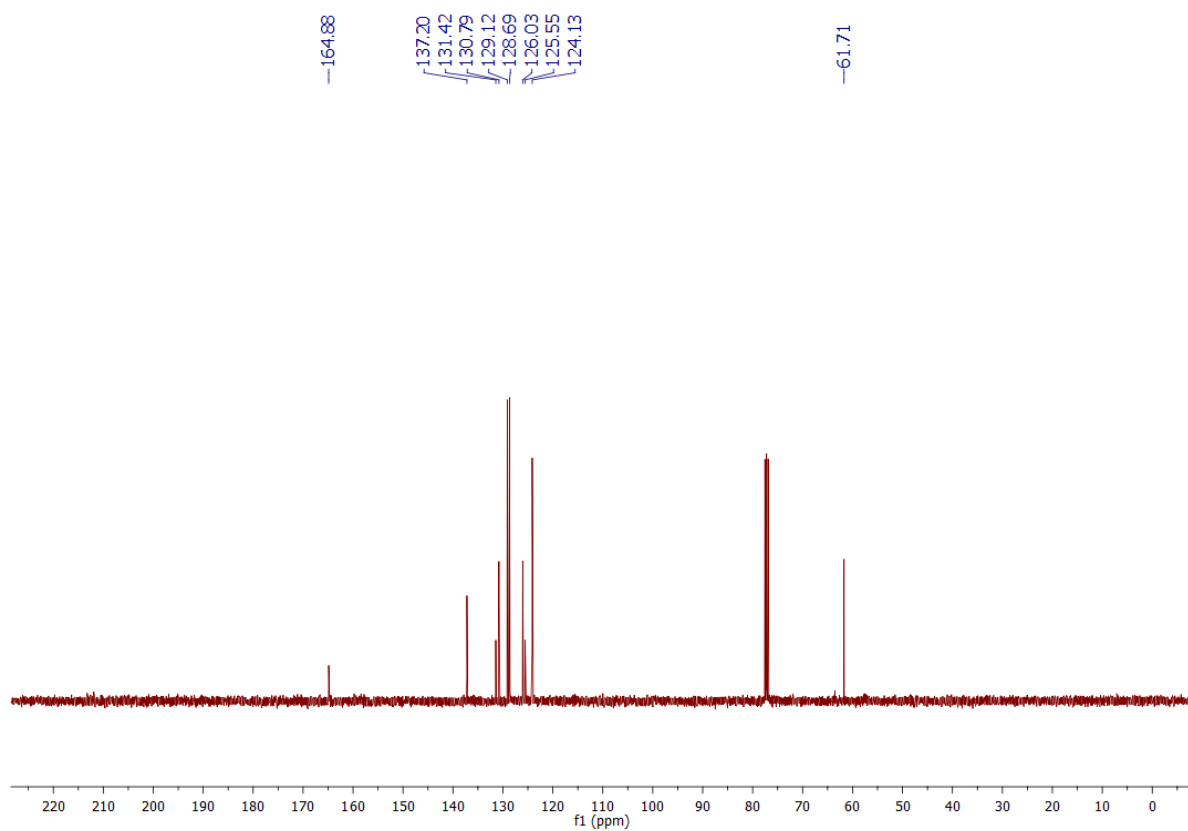

**Figure S31**  $^1\text{H}$  NMR (400 MHz,  $\text{CDCl}_3$ ) spectrum of **3aa**.

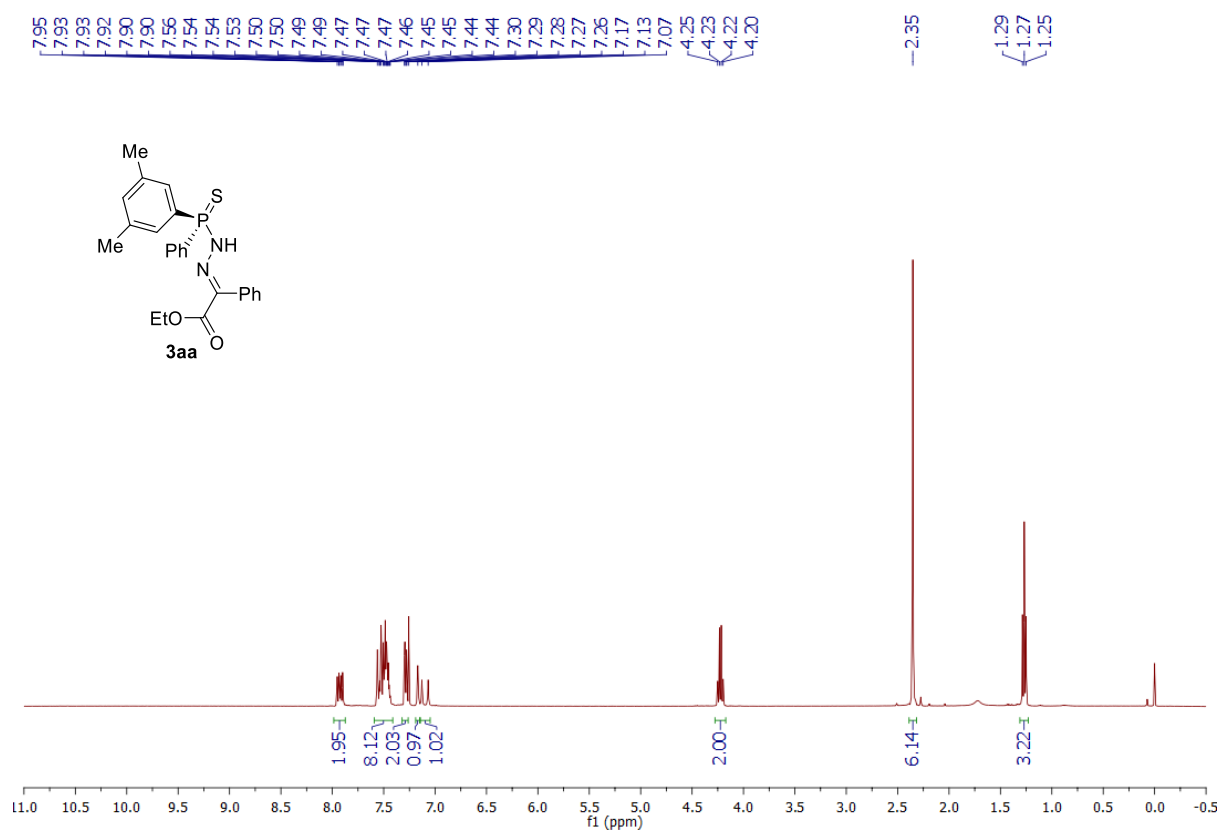

**Figure S33**  $^{31}\text{P}\{^1\text{H}\}$  NMR (162 MHz,  $\text{CDCl}_3$ ) spectrum of **3aa**.

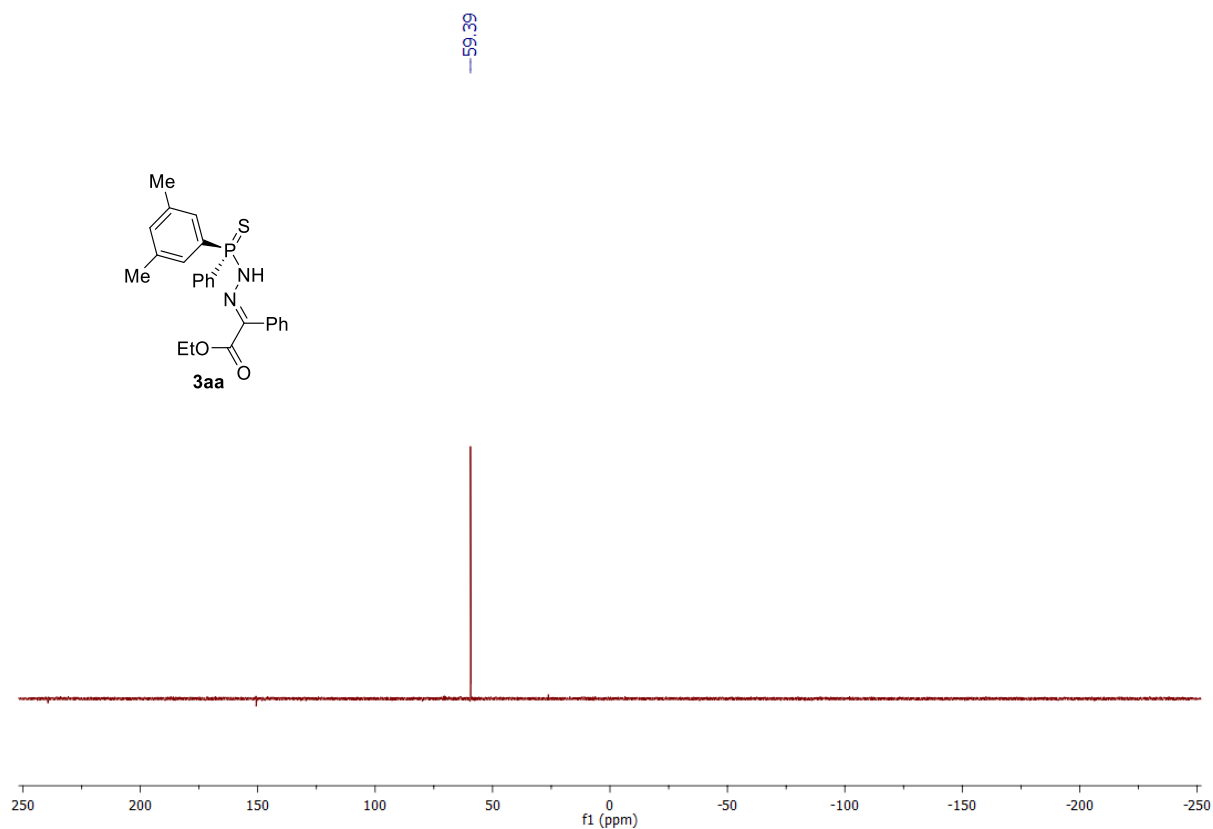

**Figure S34**  $^1\text{H}$  NMR (400 MHz,  $\text{CDCl}_3$ ) spectrum of **6aa**.

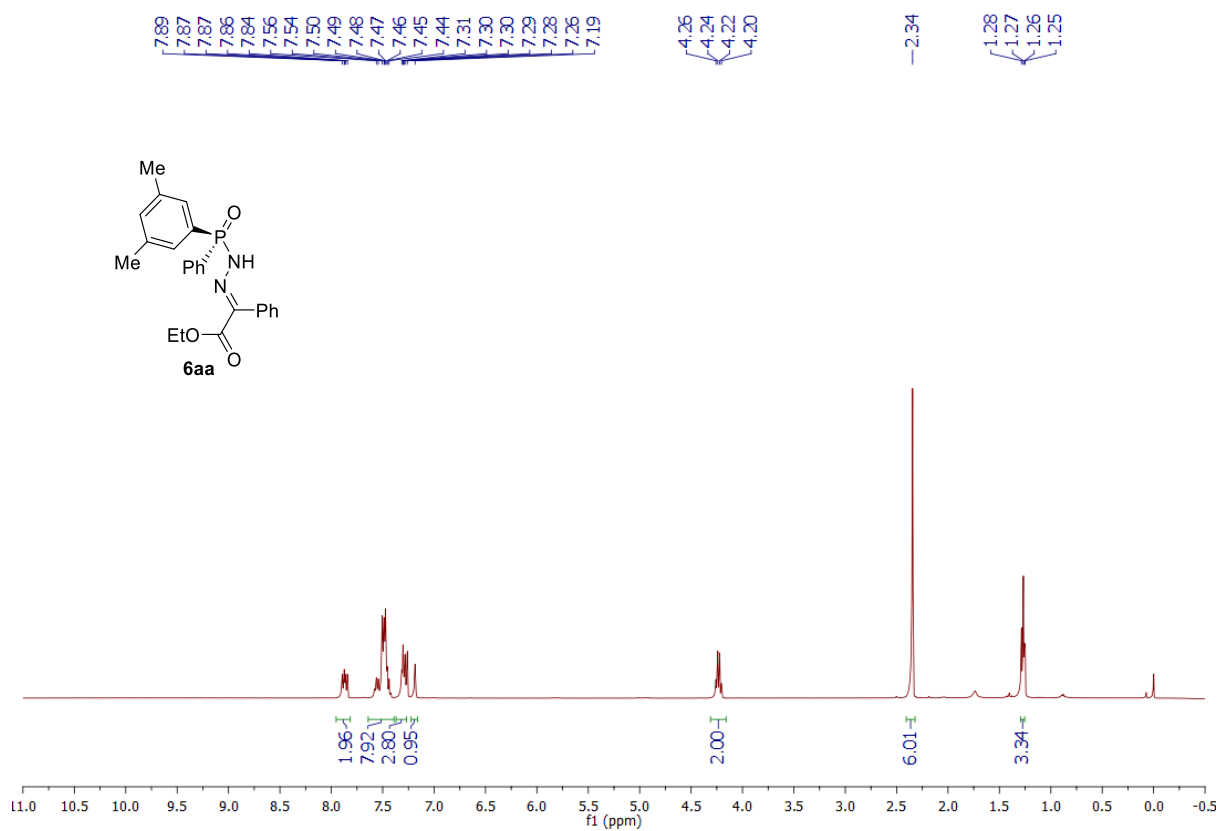

**Figure S35**  $^{13}\text{C}\{^1\text{H}\}$  NMR (101 MHz,  $\text{CDCl}_3$ ) spectrum **6aa**.

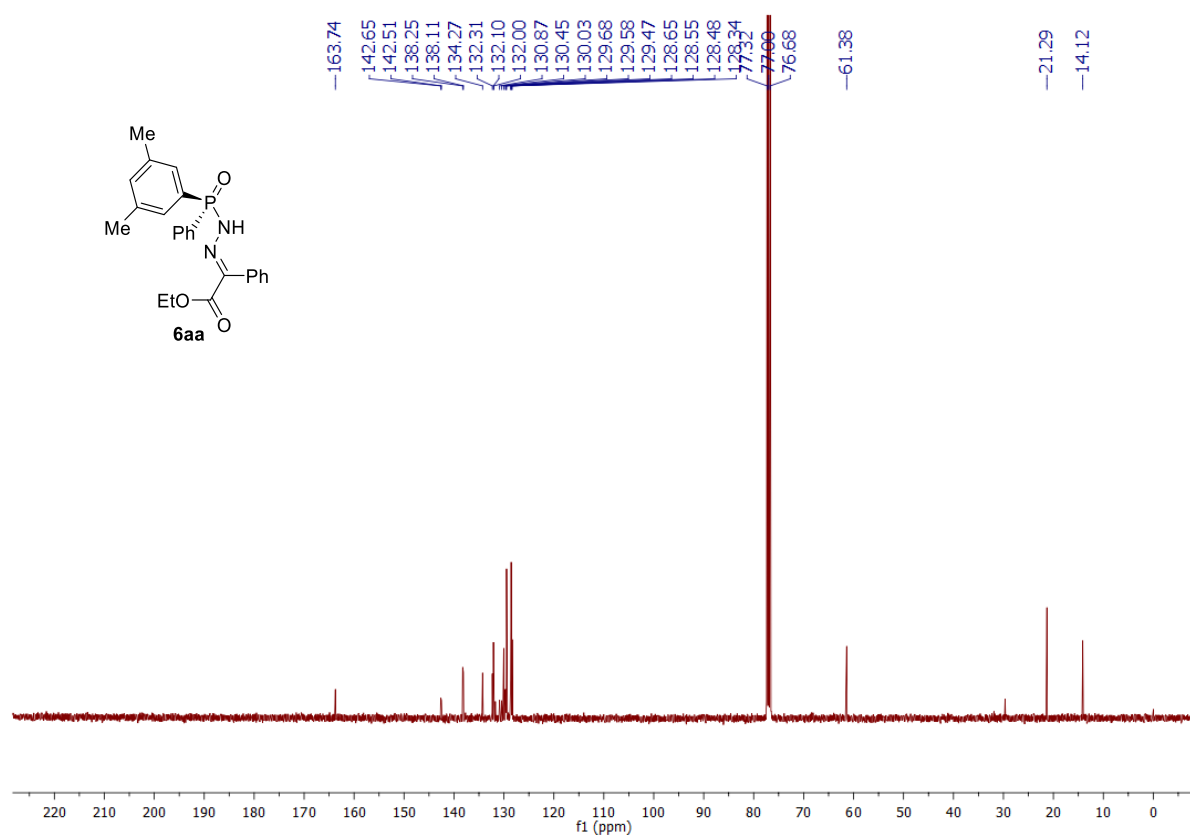

**Figure S36**  $^{31}\text{P}\{^1\text{H}\}$  NMR (162 MHz,  $\text{CDCl}_3$ ) spectrum of **6aa**.

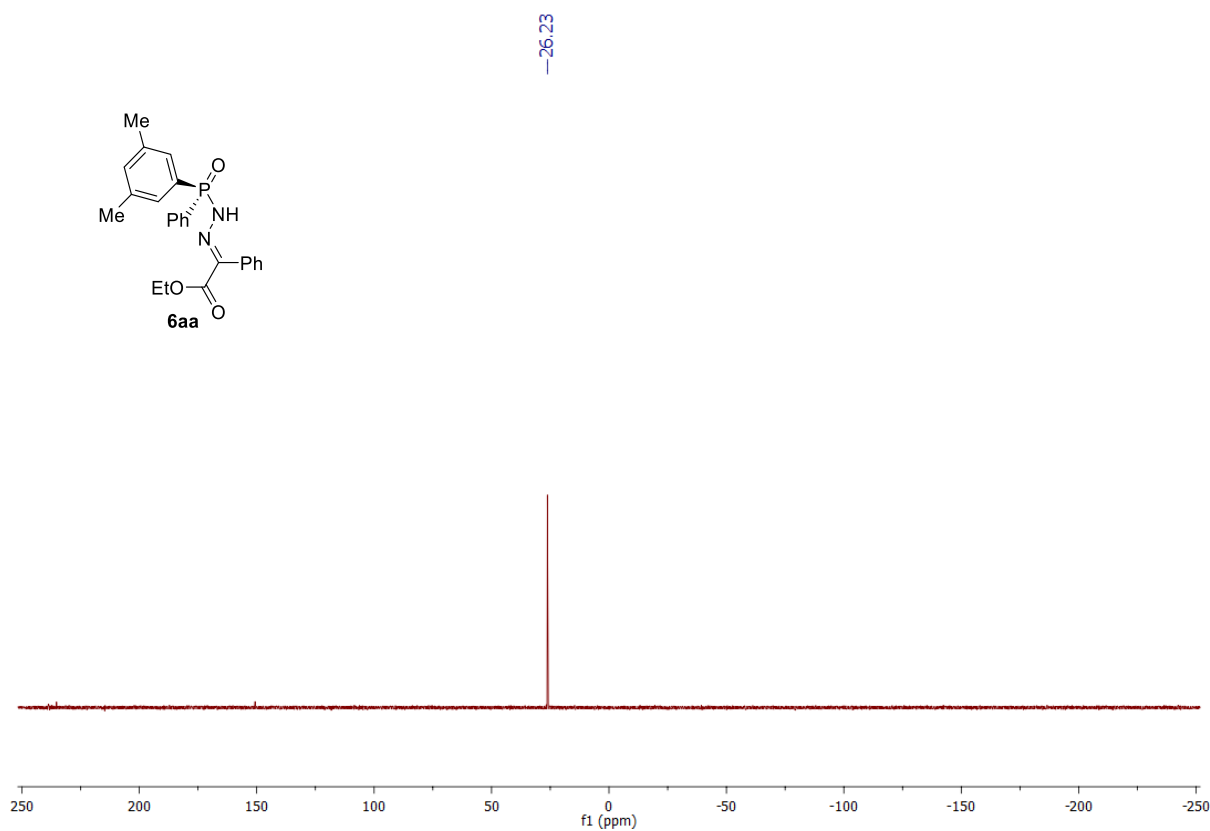

**Figure S37**  $^1\text{H}$  NMR (500 MHz,  $\text{CDCl}_3$ ) spectrum of **6ba**.

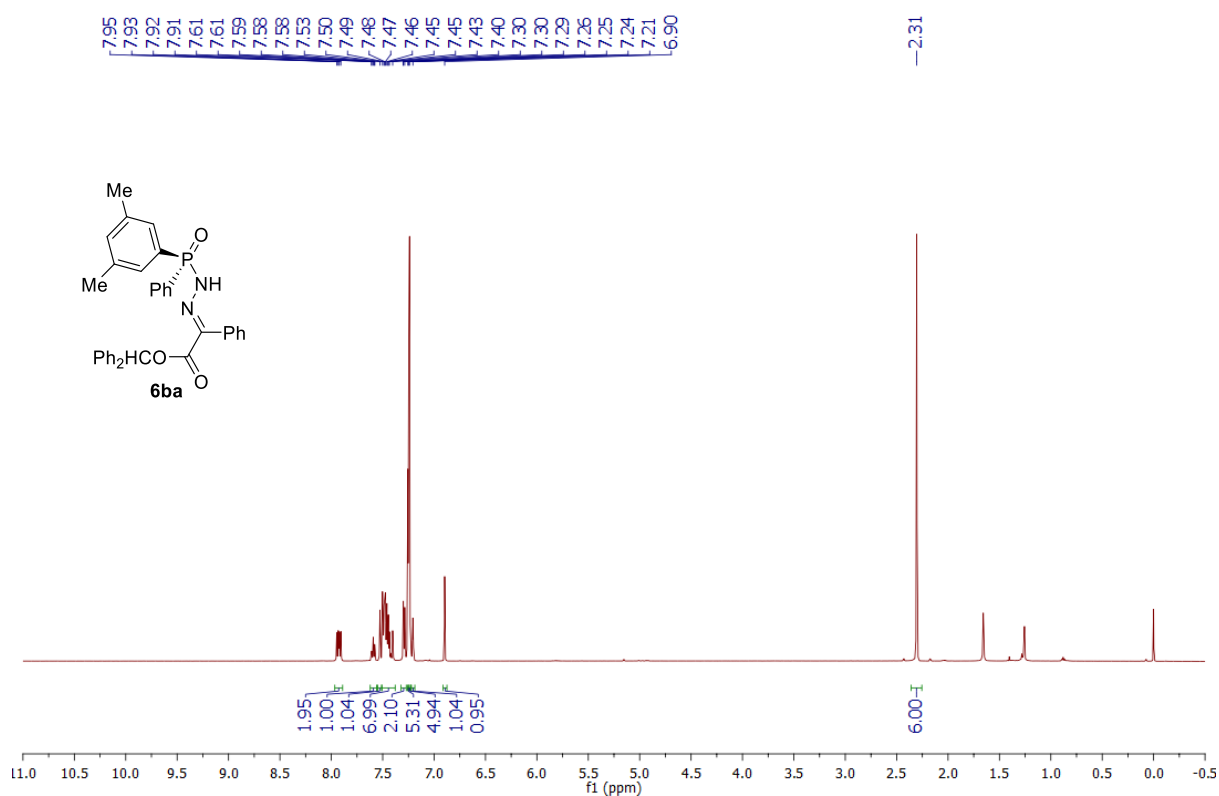

**Figure S38**  $^{13}\text{C}\{^1\text{H}\}$  NMR (101 MHz,  $\text{CDCl}_3$ ) spectrum of **6ba**.

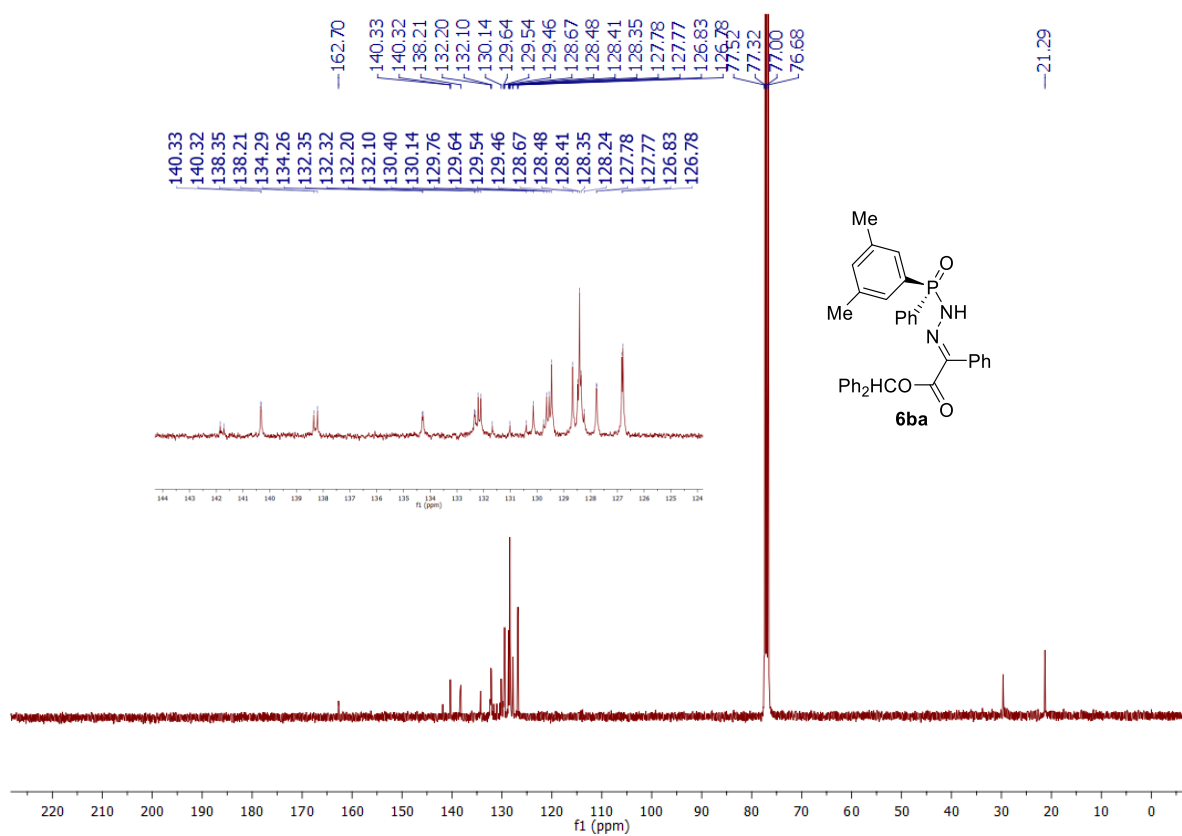

**Figure S39**  $^{31}\text{P}\{^1\text{H}\}$  NMR (162 MHz,  $\text{CDCl}_3$ ) spectrum of **6ba**.

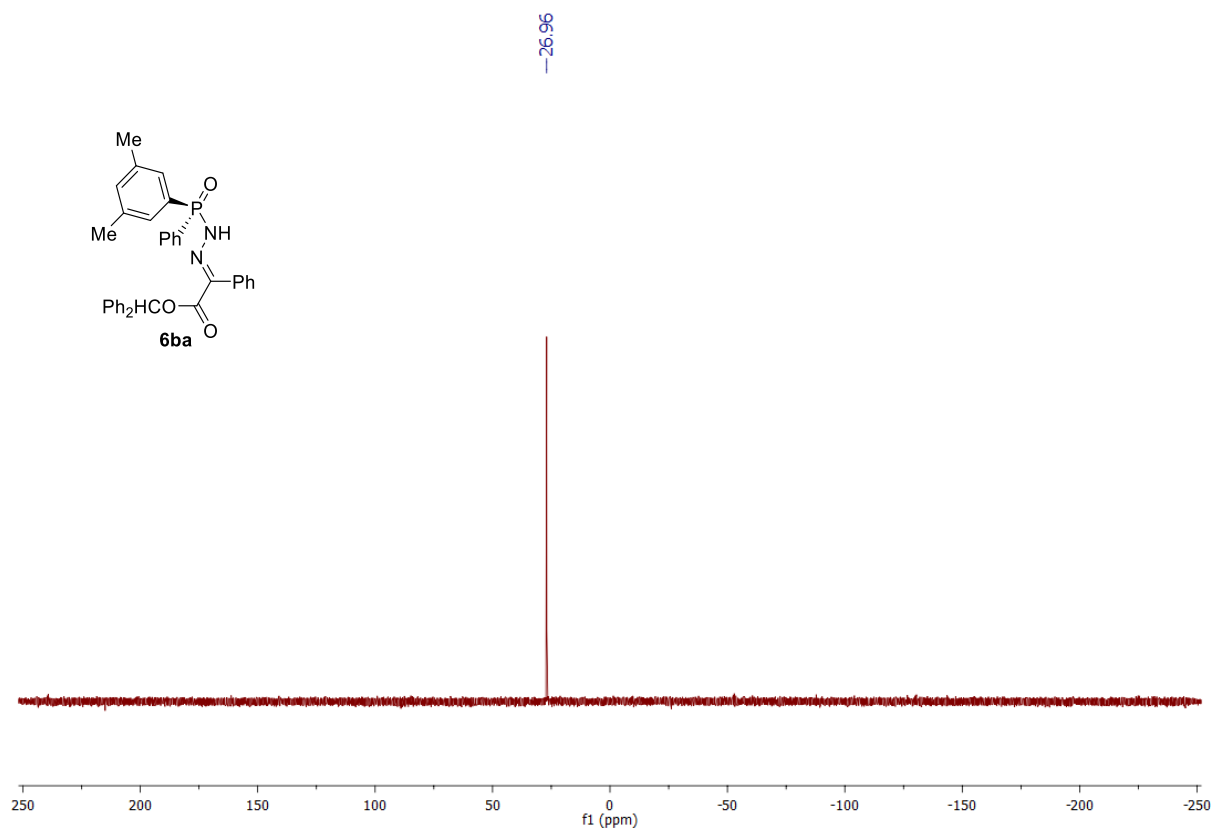

**Figure S40**  $^1\text{H}$  NMR (400 MHz,  $\text{CDCl}_3$ ) spectrum of **6ca**.

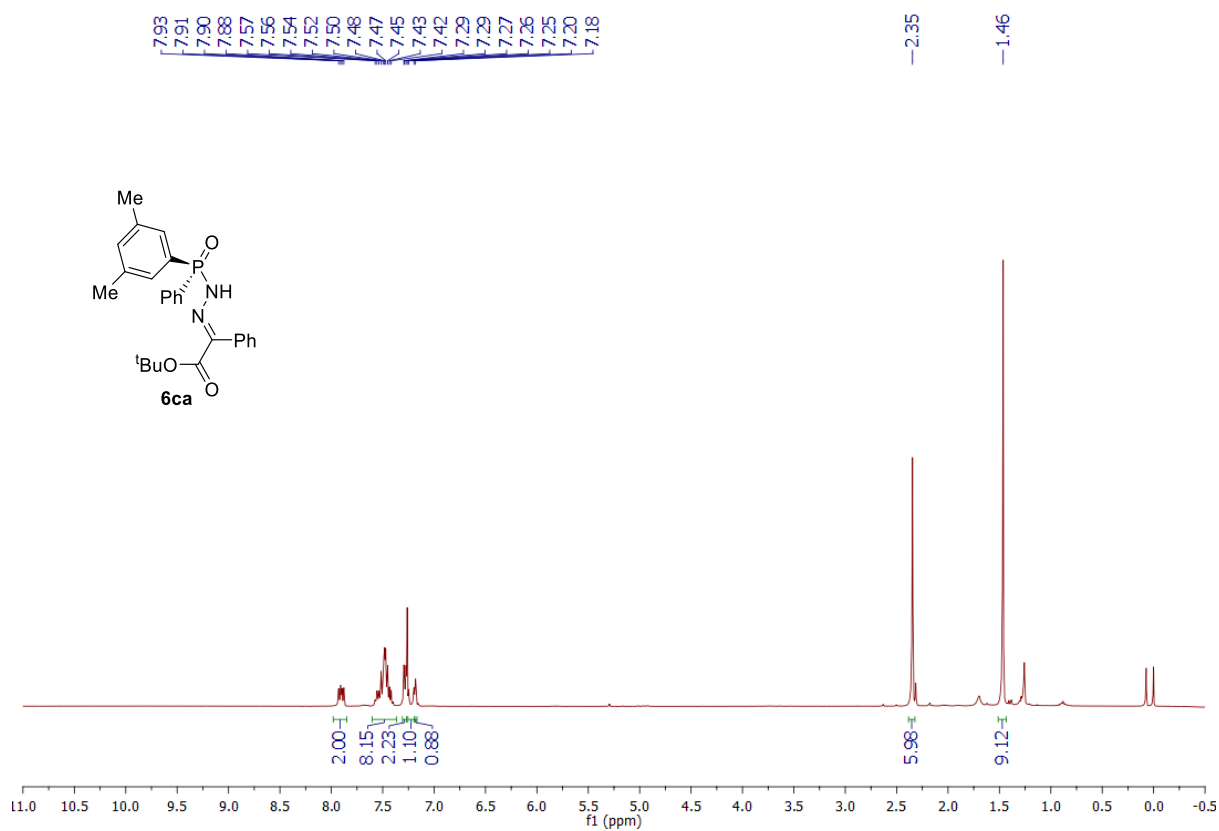

**Figure S41**  $^{13}\text{C}\{^1\text{H}\}$  NMR (101 MHz,  $\text{CDCl}_3$ ) spectrum **6ca**.

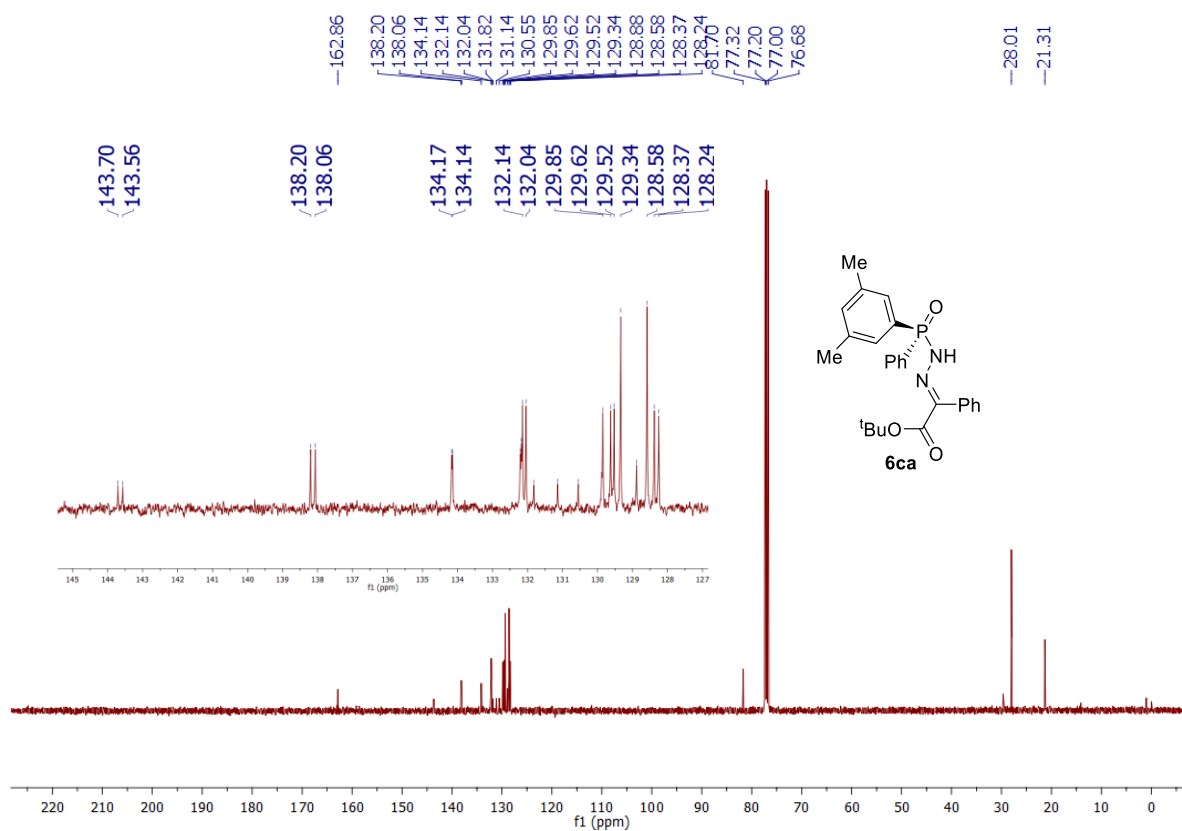

**Figure S42**  $^{31}\text{P}\{^1\text{H}\}$  NMR (162 MHz,  $\text{CDCl}_3$ ) spectrum of **6ca**.

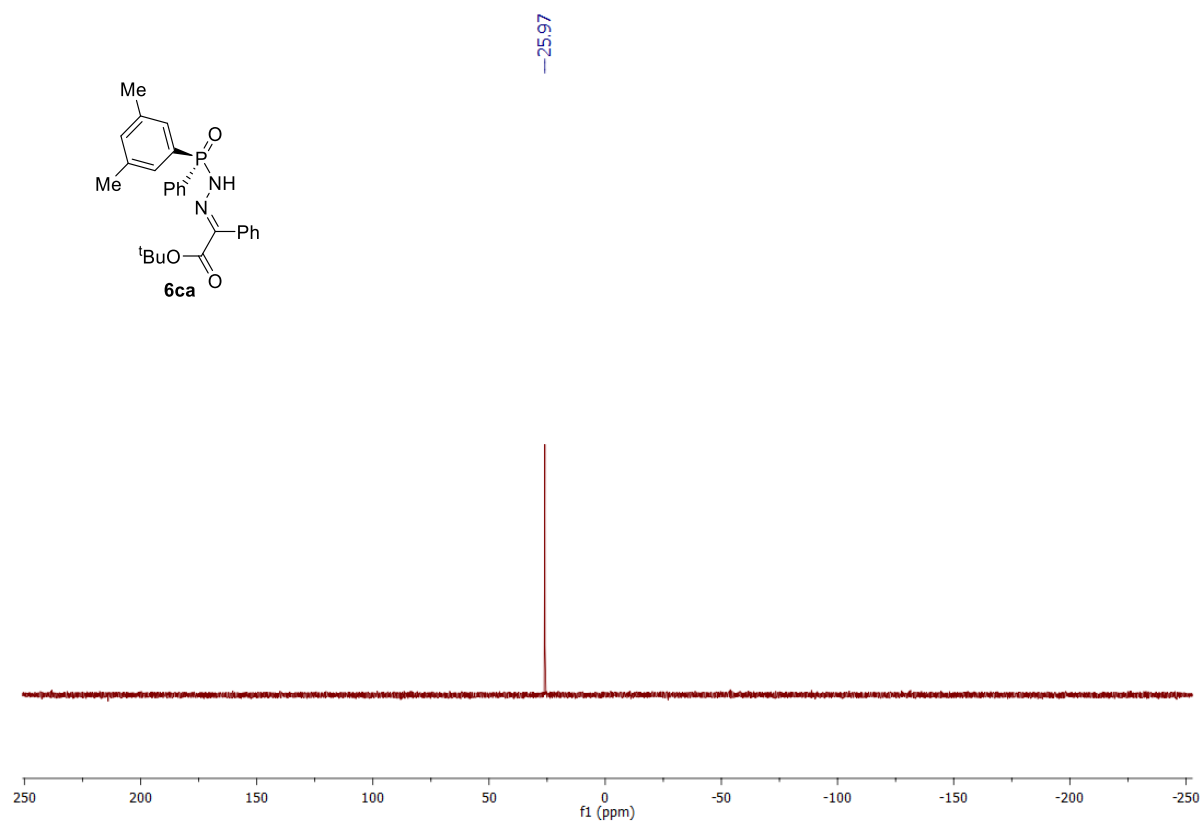

**Figure S43**  $^1\text{H}$  NMR (500 MHz,  $\text{CDCl}_3$ ) spectrum of **6cb**.

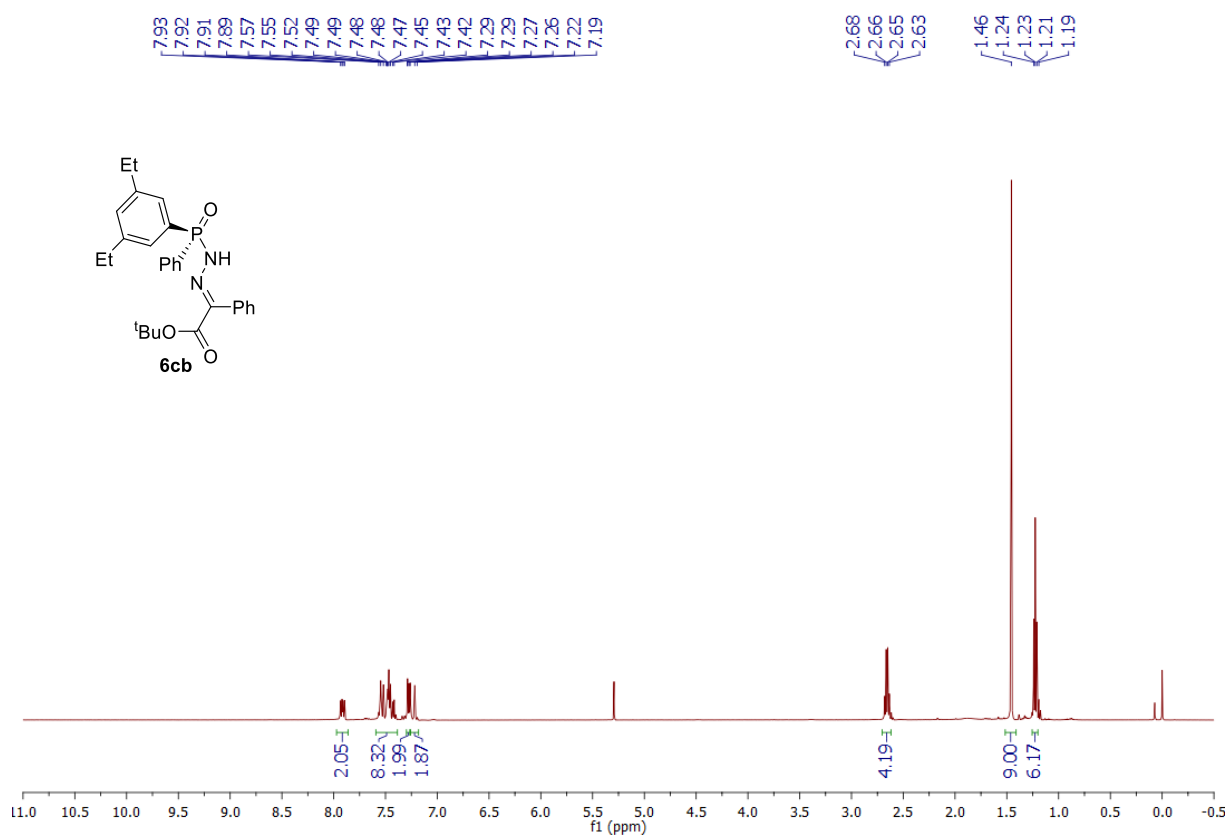

**Figure S44**  $^{13}\text{C}\{^1\text{H}\}$  NMR (126 MHz,  $\text{CDCl}_3$ ) spectrum of **6cb**.

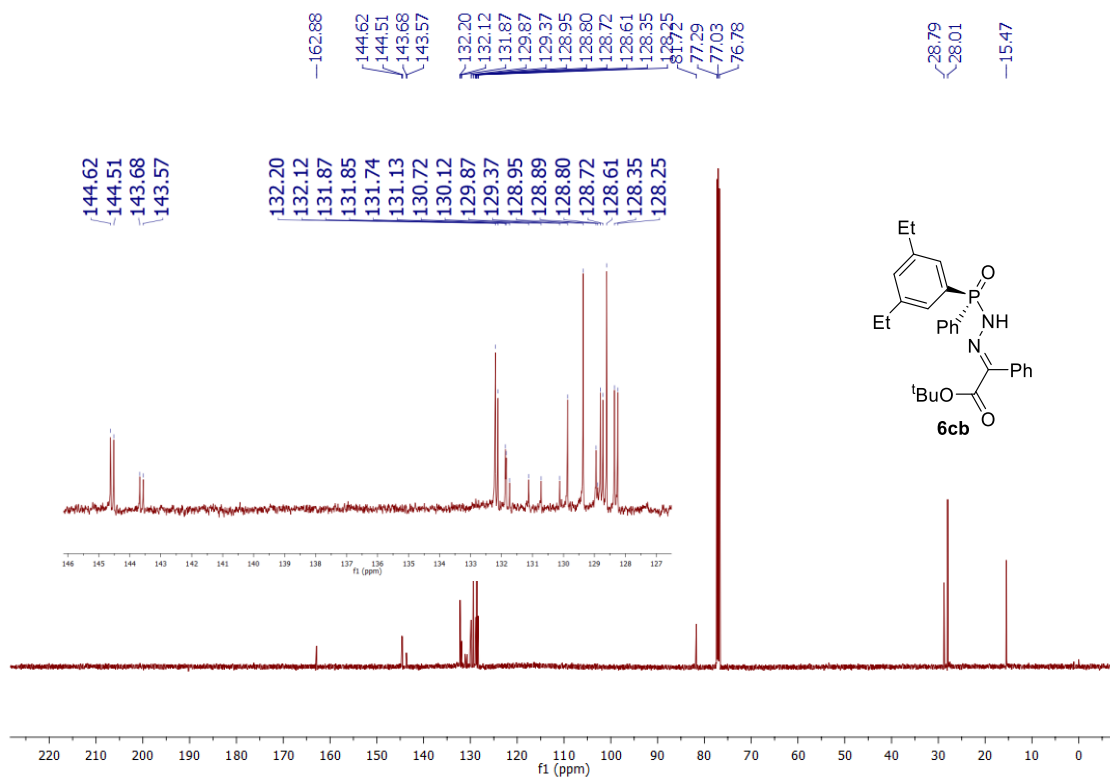



**Figure S45**  $^{31}\text{P}\{^1\text{H}\}$  NMR (162 MHz,  $\text{CDCl}_3$ ) spectrum of **6cb**.

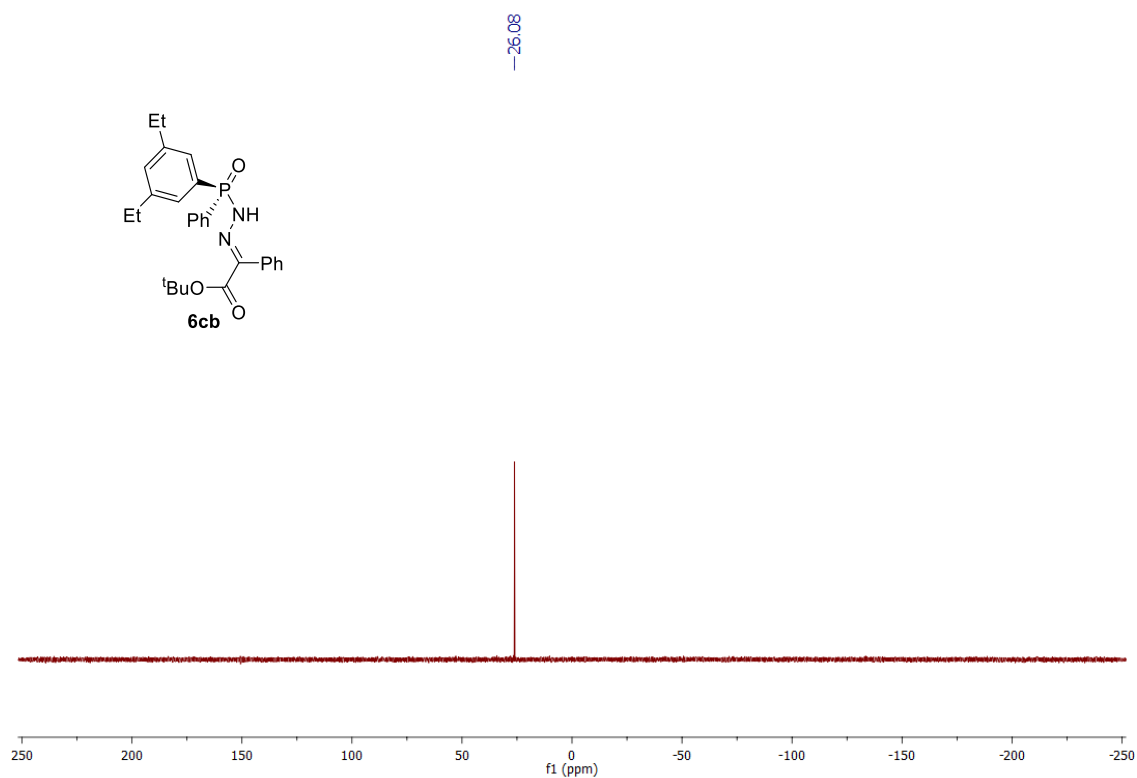

**Figure S46**  $^1\text{H}$  NMR (500 MHz,  $\text{CDCl}_3$ ) spectrum of **6db**.

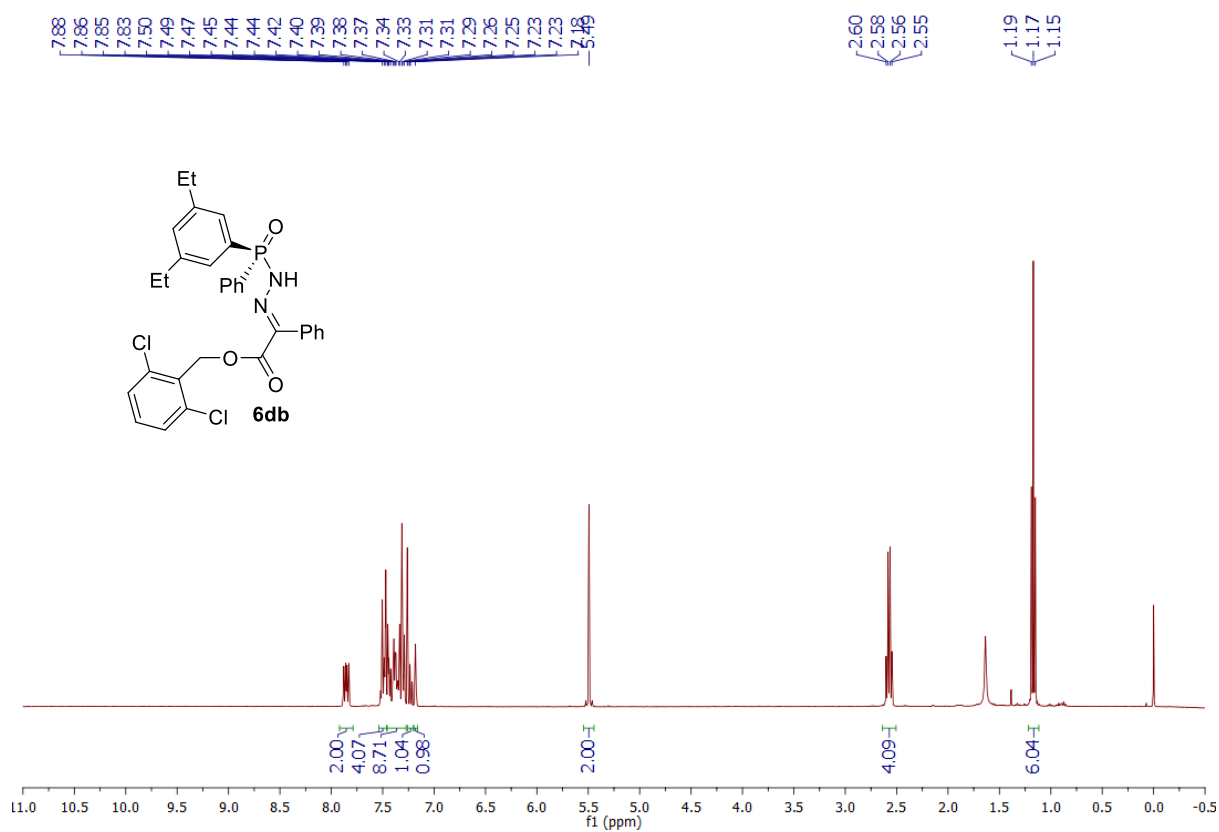

**Chemical structure of 6db:** CCOP(=O)(NC(=O)OC1=CC=C(C=C1)Cl)C2=CC=C(C=C2)C

**<sup>13</sup>C NMR spectrum (CDCl<sub>3</sub>):**

**Peak list (ppm):** 132.39, 132.36, 132.27, 132.17, 132.00, 131.97, 131.51, 131.37, 130.69, 130.65, 130.32, 130.12, 129.67, 128.90, 128.87, 128.80, 128.55, 128.51, 128.38, 132.36, 132.27, 132.17, 132.00, 131.97, 131.51, 130.69, 130.65, 130.32, 130.12, 129.67, 128.90, 128.87, 128.60, 128.55, 128.51, 128.38, 62.78, 28.92, 15.60.

Chemical structure of **6db** is shown above the spectrum. The structure is a phosphoramidate derivative. It features a central phosphorus atom (P) double-bonded to an oxygen atom (O) and single-bonded to a nitrogen atom (NH). The nitrogen atom is further bonded to a phenyl group (Ph). The phosphorus atom is also bonded to a 4-ethylphenyl group (Et) and a 2,6-dichlorophenyl group (Cl). The 2,6-dichlorophenyl group is connected to the phosphorus atom via a methylene group (CH<sub>2</sub>) and an ester linkage (O-C=O).

**Figure S49**  $^1\text{H}$  NMR (300 MHz,  $\text{CDCl}_3$ ) spectrum of **6bc**.

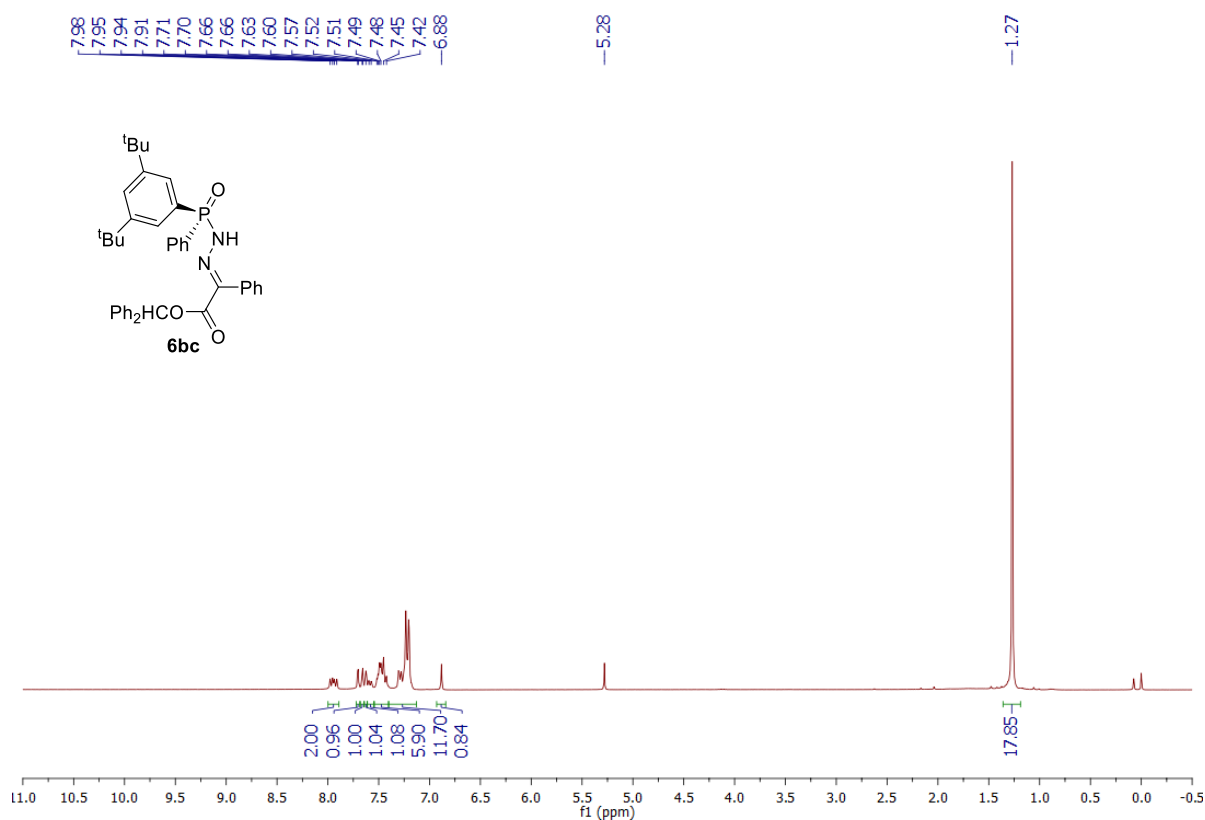

**Figure S50**  $^{13}\text{C}\{^1\text{H}\}$  NMR (101 MHz,  $\text{CDCl}_3$ ) spectrum of **6bc**.

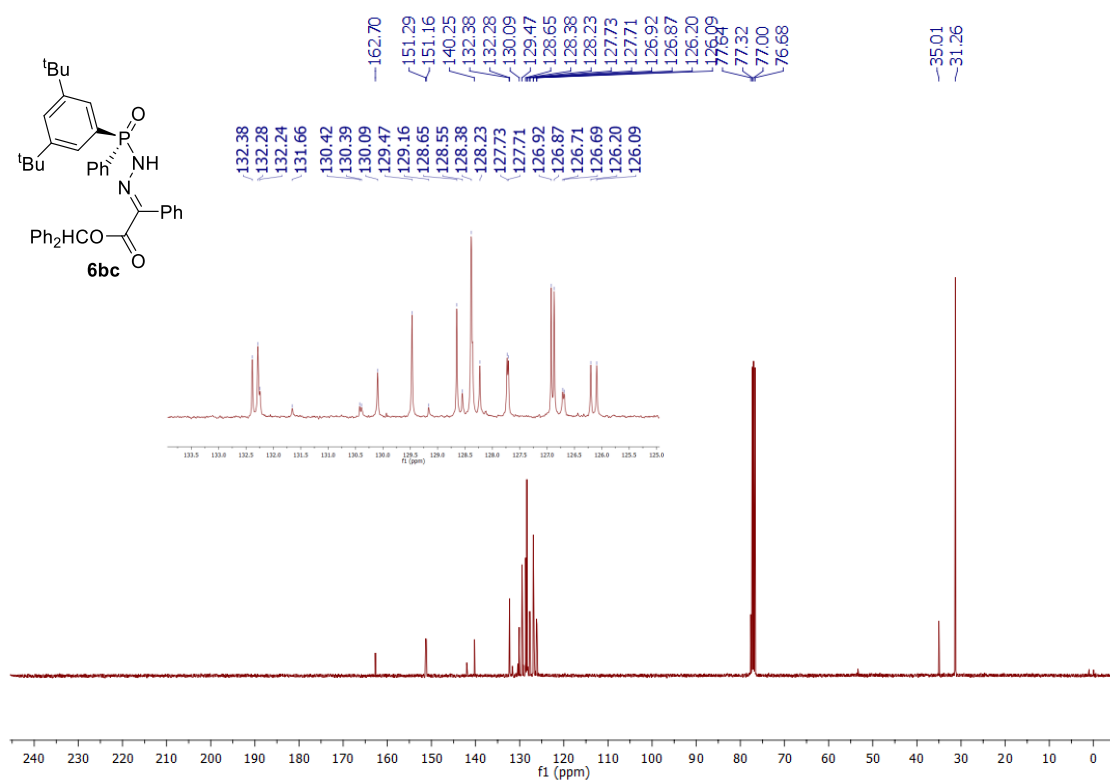

**Figure S51**  $^{31}\text{P}\{^1\text{H}\}$  NMR (162 MHz,  $\text{CDCl}_3$ ) spectrum of **6bc**.

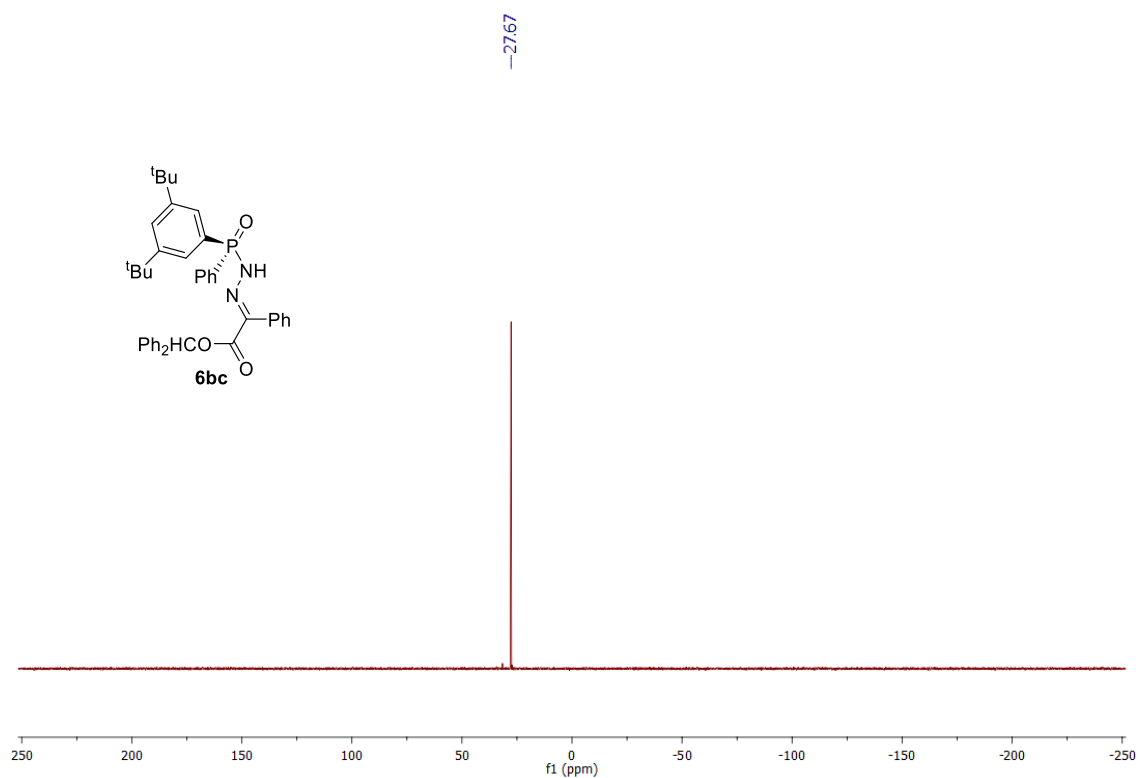

**Figure S52**  $^1\text{H}$  NMR (400 MHz,  $\text{CDCl}_3$ ) spectrum of **6cc**.

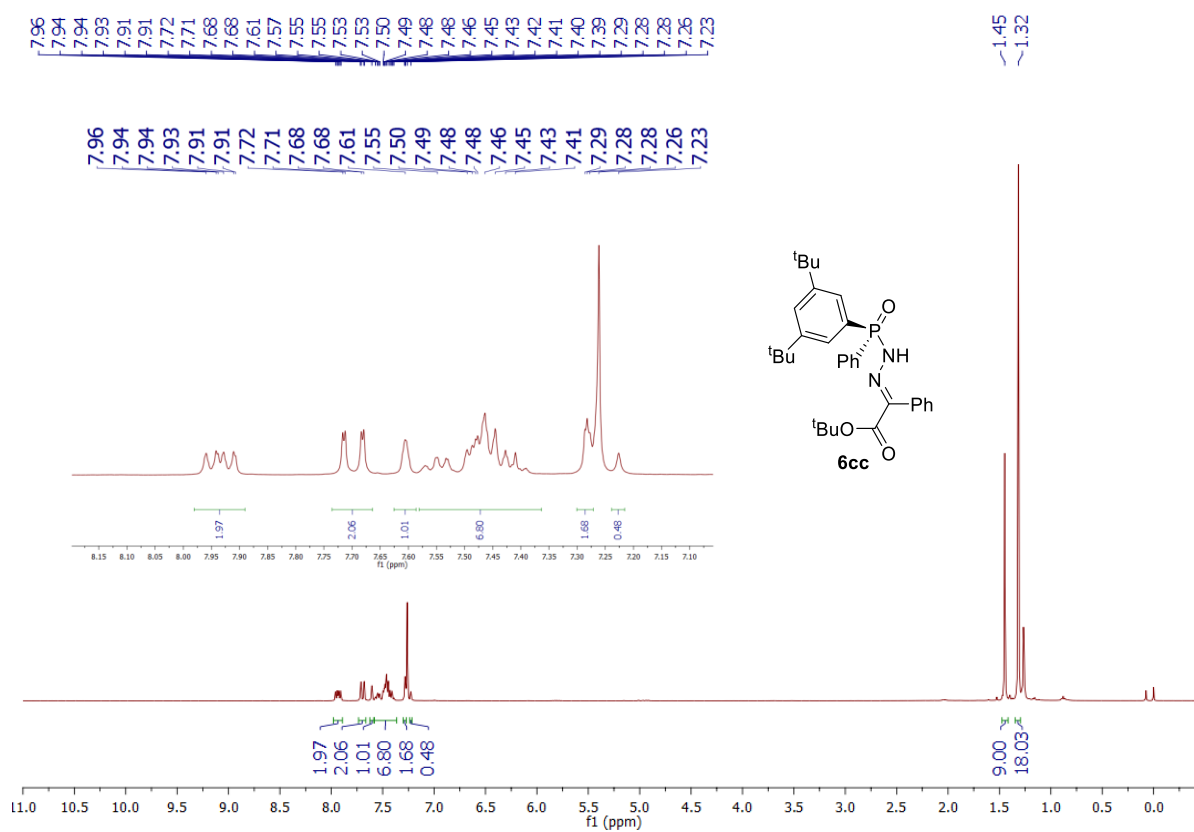

**Figure S53**  $^{13}\text{C}\{^1\text{H}\}$  NMR (101 MHz,  $\text{CDCl}_3$ ) spectrum **6cc**.

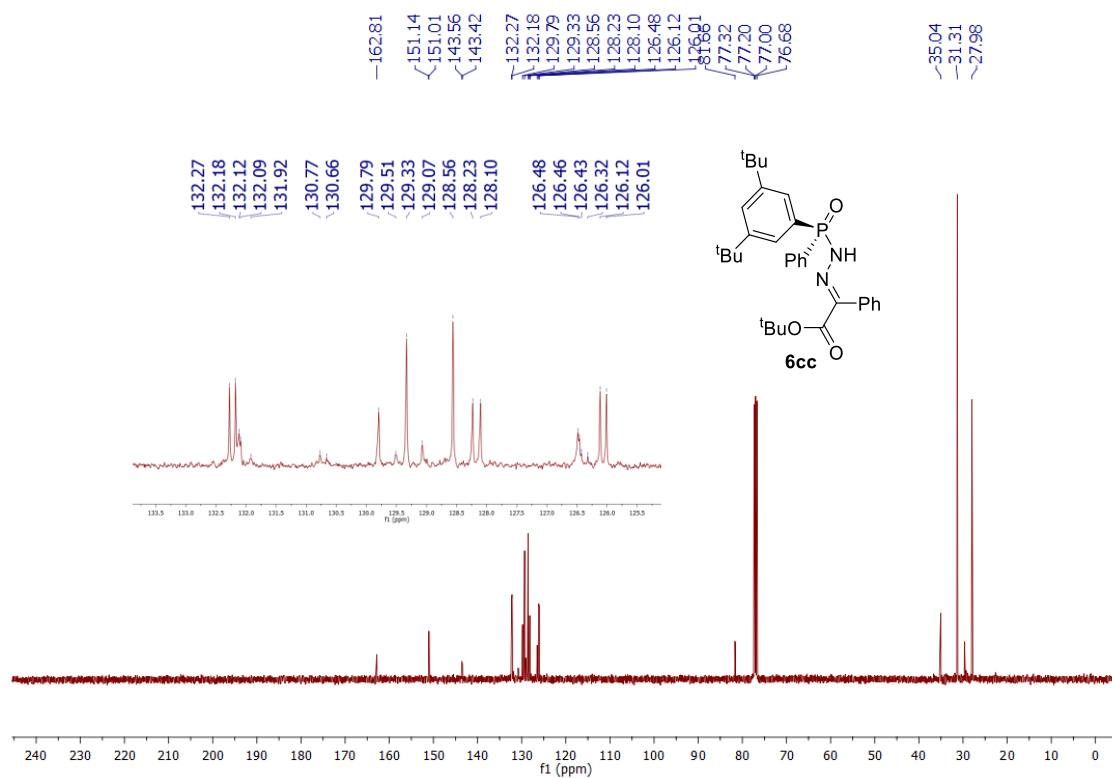

**Figure S54**  $^{31}\text{P}\{^1\text{H}\}$  NMR (162 MHz,  $\text{CDCl}_3$ ) spectrum of **6cc**.

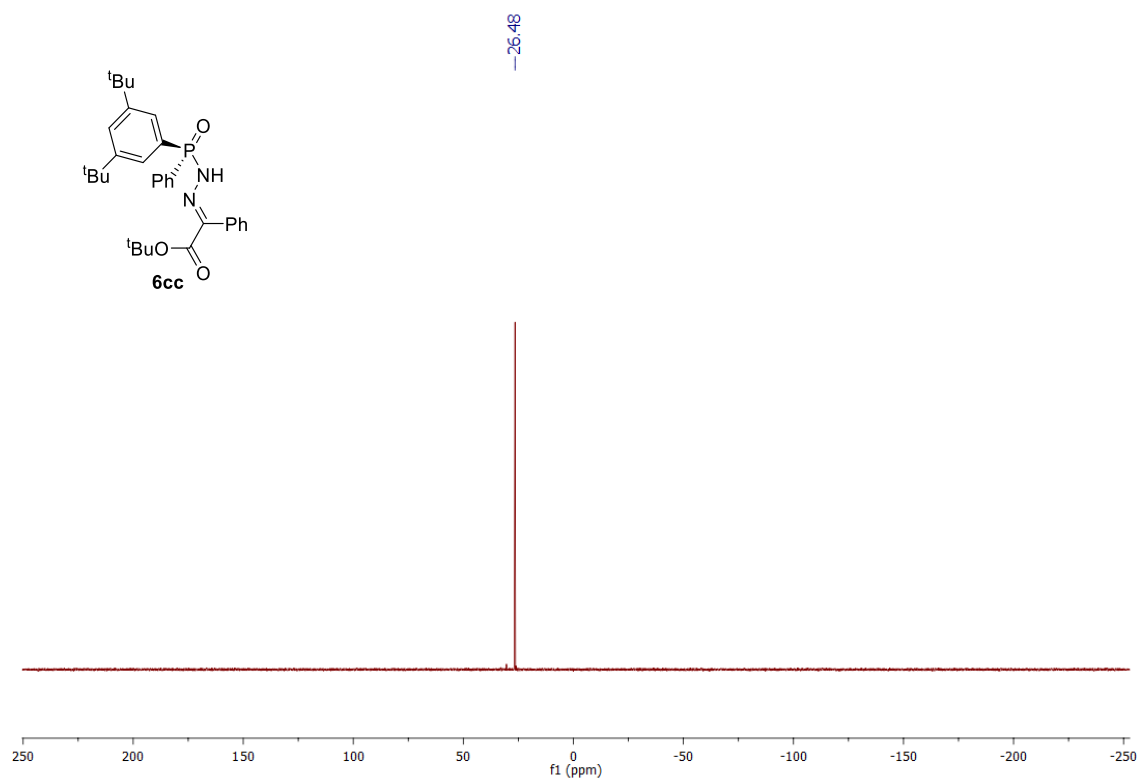

Figure S55  $^1\text{H}$  NMR (400 MHz,  $\text{CDCl}_3$ ) spectrum of **6cd**.

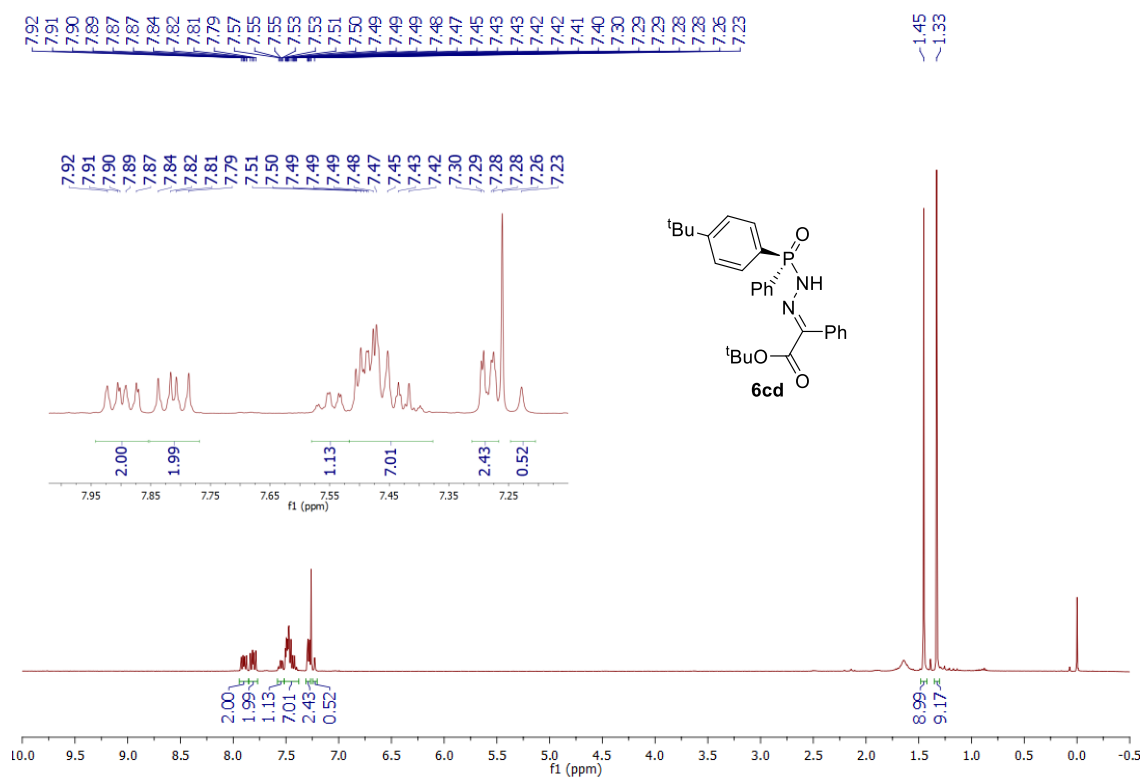

Figure S56  $^{13}\text{C}\{^1\text{H}\}$  NMR (101 MHz,  $\text{CDCl}_3$ ) spectrum **6cd**.

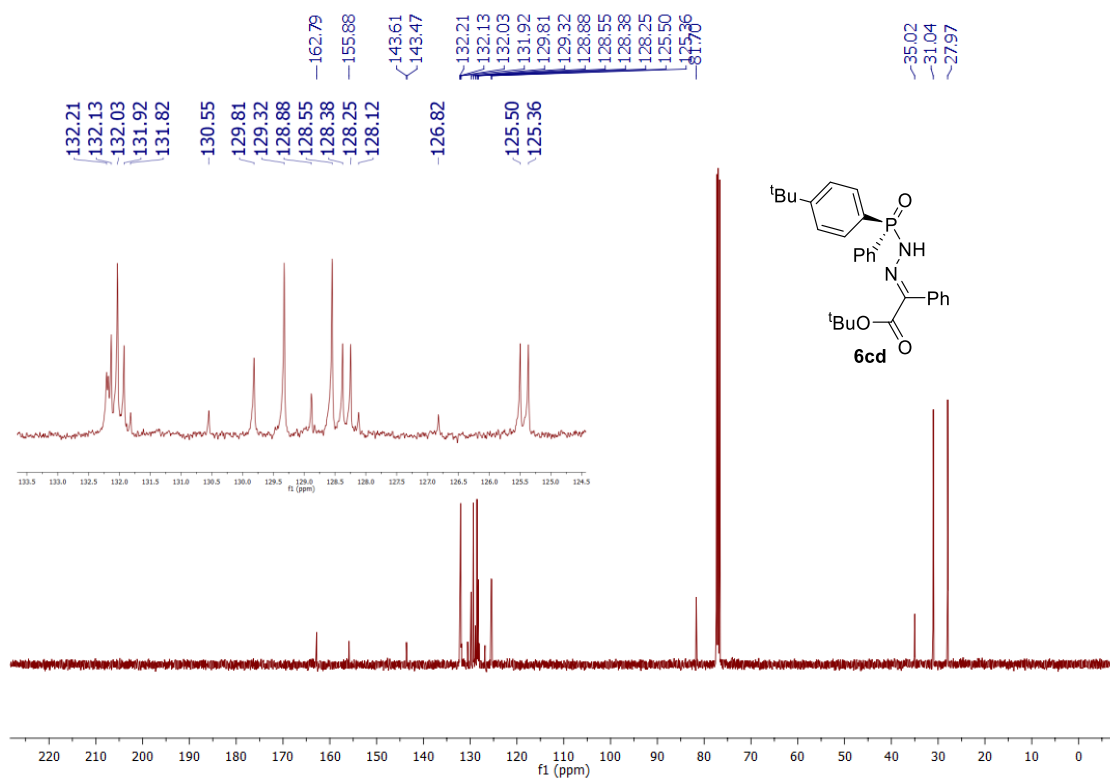

**Figure S57**  $^{31}\text{P}\{^1\text{H}\}$  NMR (162 MHz,  $\text{CDCl}_3$ ) spectrum of **6cd**.

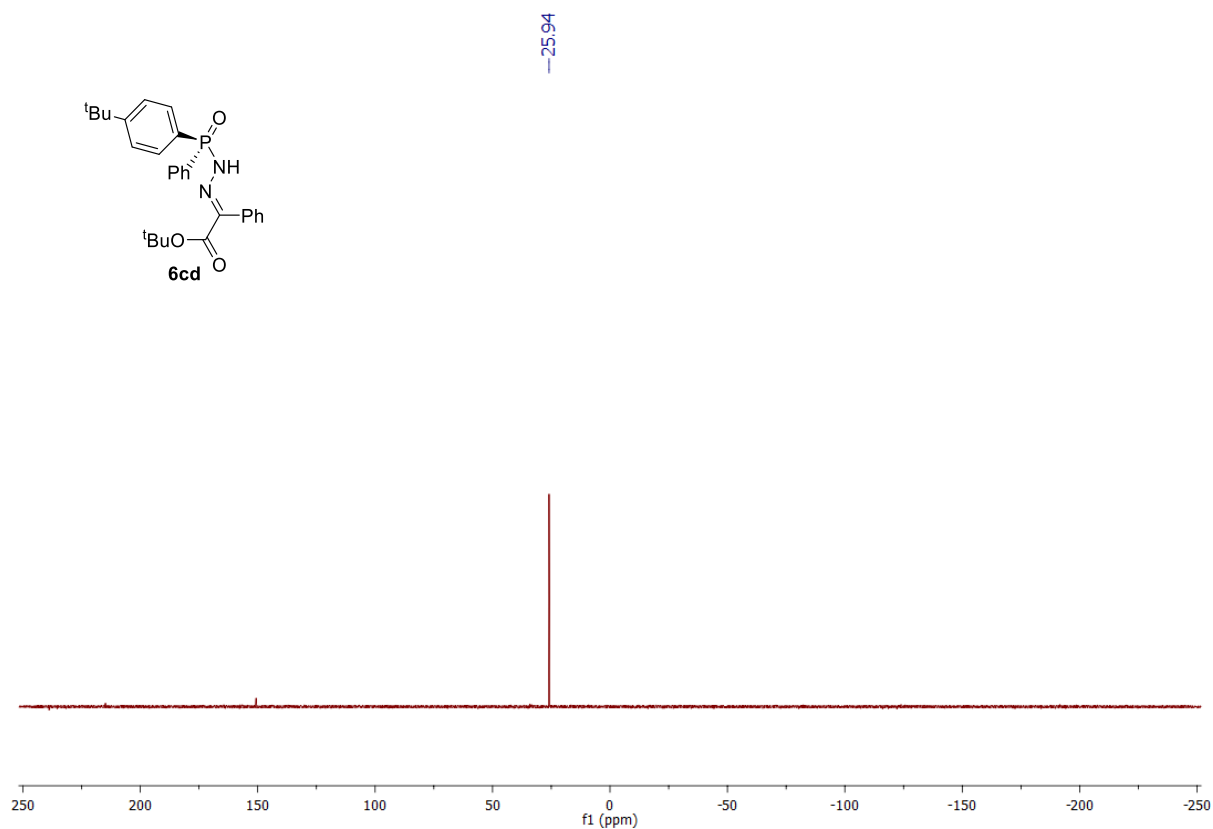

**Figure S58**  $^1\text{H}$  NMR (500 MHz,  $\text{CDCl}_3$ ) spectrum of **6ce**.

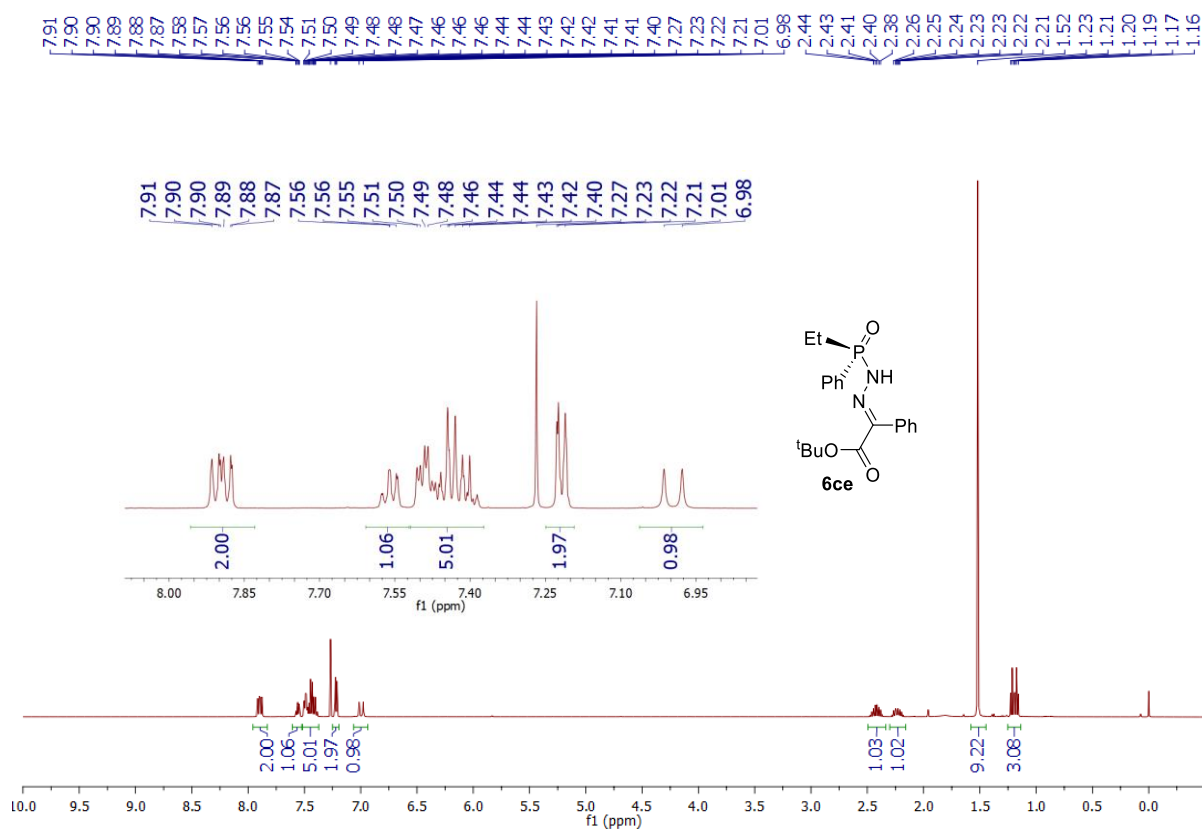

Figure S59  $^{13}\text{C}\{^1\text{H}\}$  NMR (126 MHz,  $\text{CDCl}_3$ ) spectrum **6ce**.

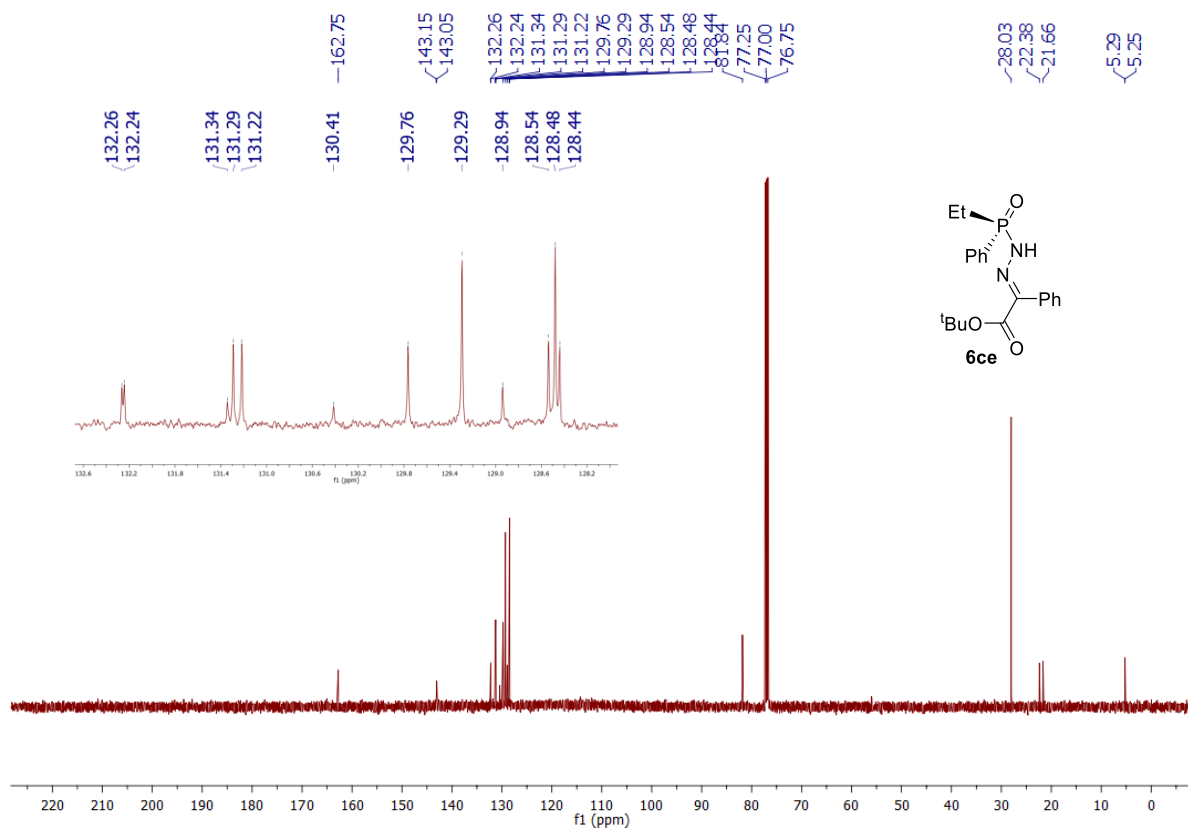

Figure S60  $^{31}\text{P}\{^1\text{H}\}$  NMR (162 MHz,  $\text{CDCl}_3$ ) spectrum of **6ce**.

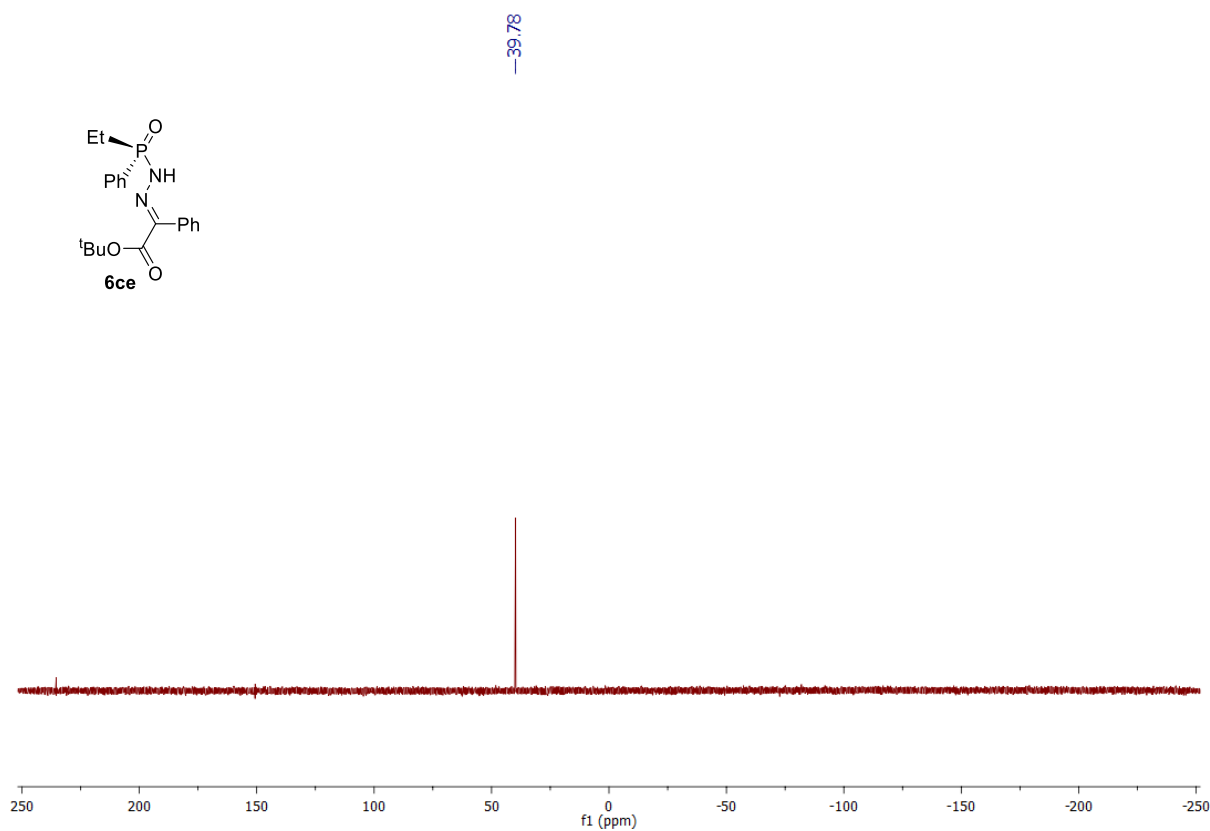



**Figure S61**  $^1\text{H}$  NMR (500 MHz,  $\text{CDCl}_3$ , mixture,  $de=68\%$ ) spectrum of (*R,S,R,R*)-**6eb** (major isomer).

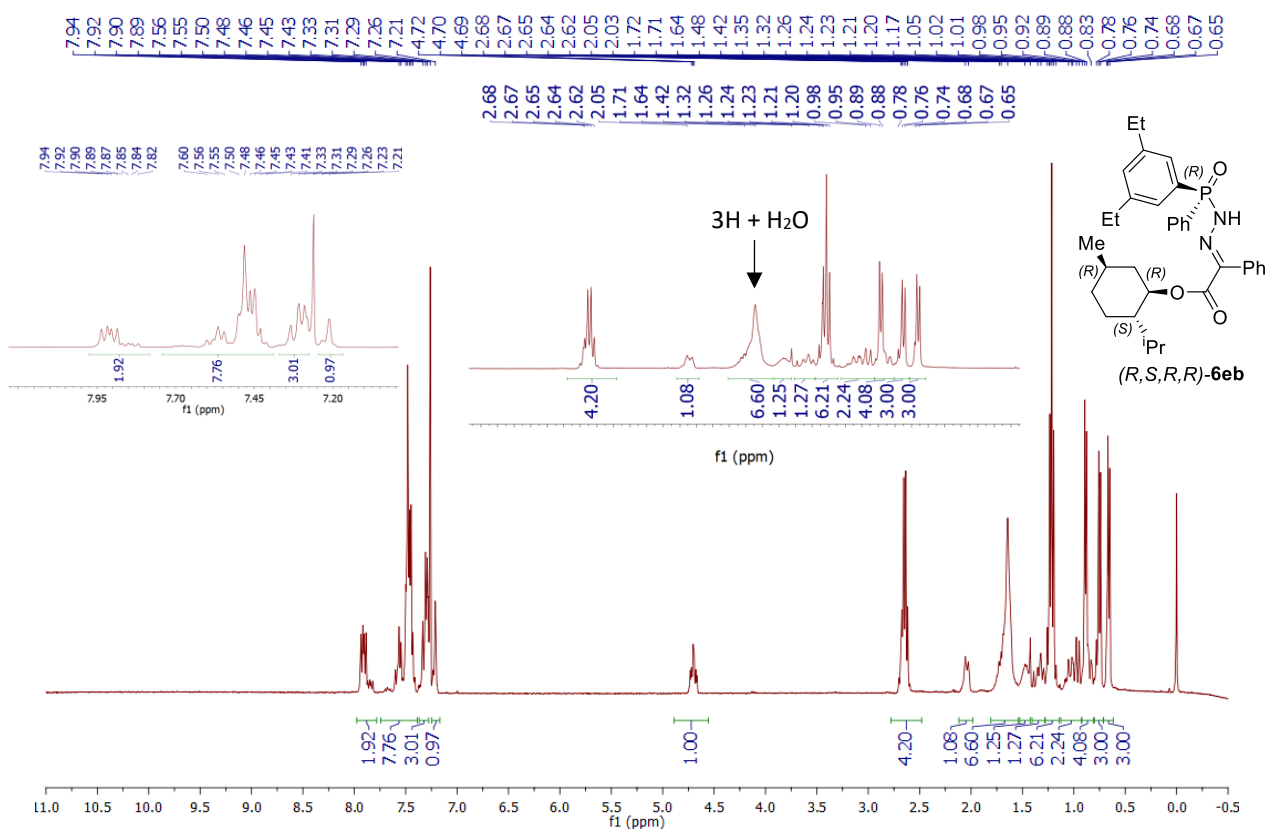

**Figure S62**  $^{13}\text{C}\{^1\text{H}\}$  NMR (126 MHz,  $\text{CDCl}_3$ , mixture,  $de=68\%$ ) spectrum of (*R,S,R,R*)-**6eb** (major isomer).

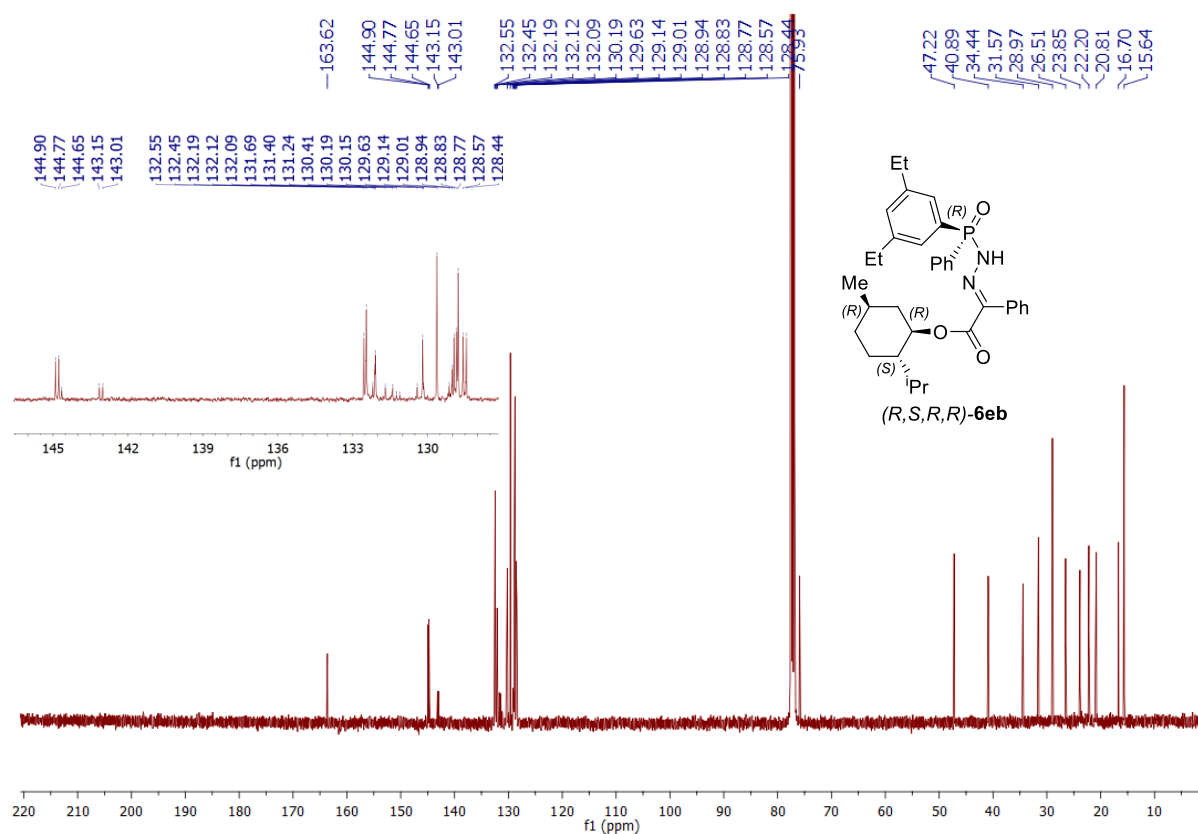

**Figure S63**  $^{31}\text{P}\{^1\text{H}\}$  NMR (162 MHz,  $\text{CDCl}_3$ , mixture,  $de=68\%$ ) spectrum of  $(R,S,R,R)$ -**6eb** (major isomer).

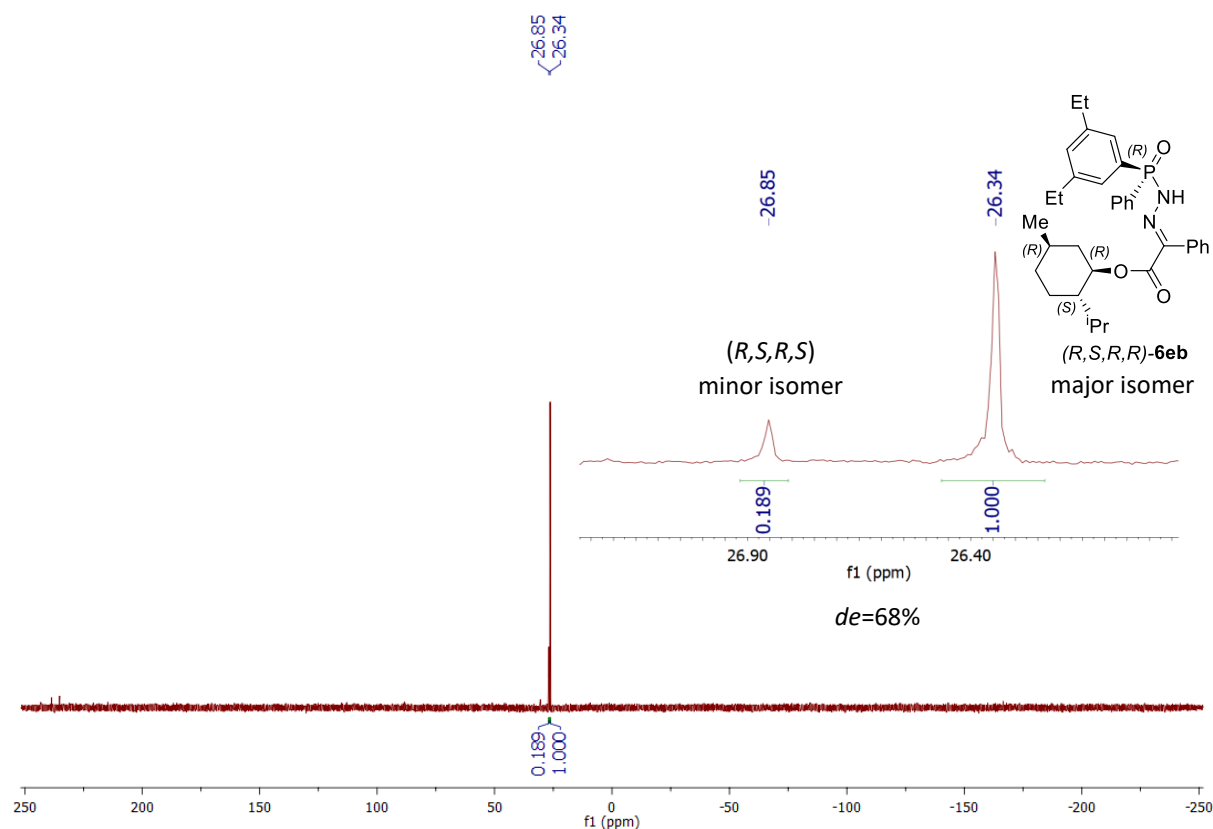

**Figure S64**  $^1\text{H}$  NMR (500 MHz,  $\text{CDCl}_3$ , mixture,  $de=70\%$ ) spectrum of  $(R,S,R,S)$ -**6eb** (major isomer).

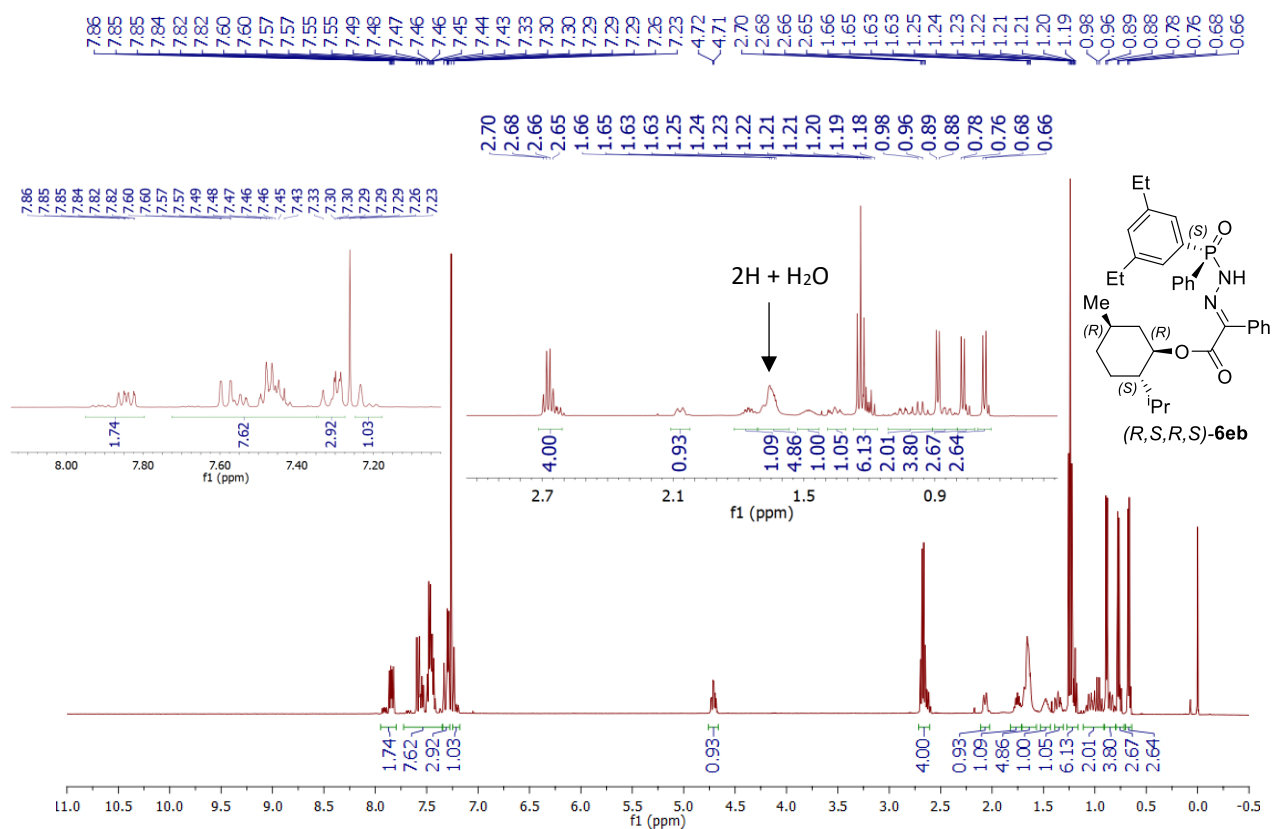

**Figure S65**  $^{13}\text{C}\{^1\text{H}\}$  NMR (126 MHz,  $\text{CDCl}_3$ , mixture,  $de=70\%$ ) spectrum (*R,S,R,S*)-**6eb** (major isomer).

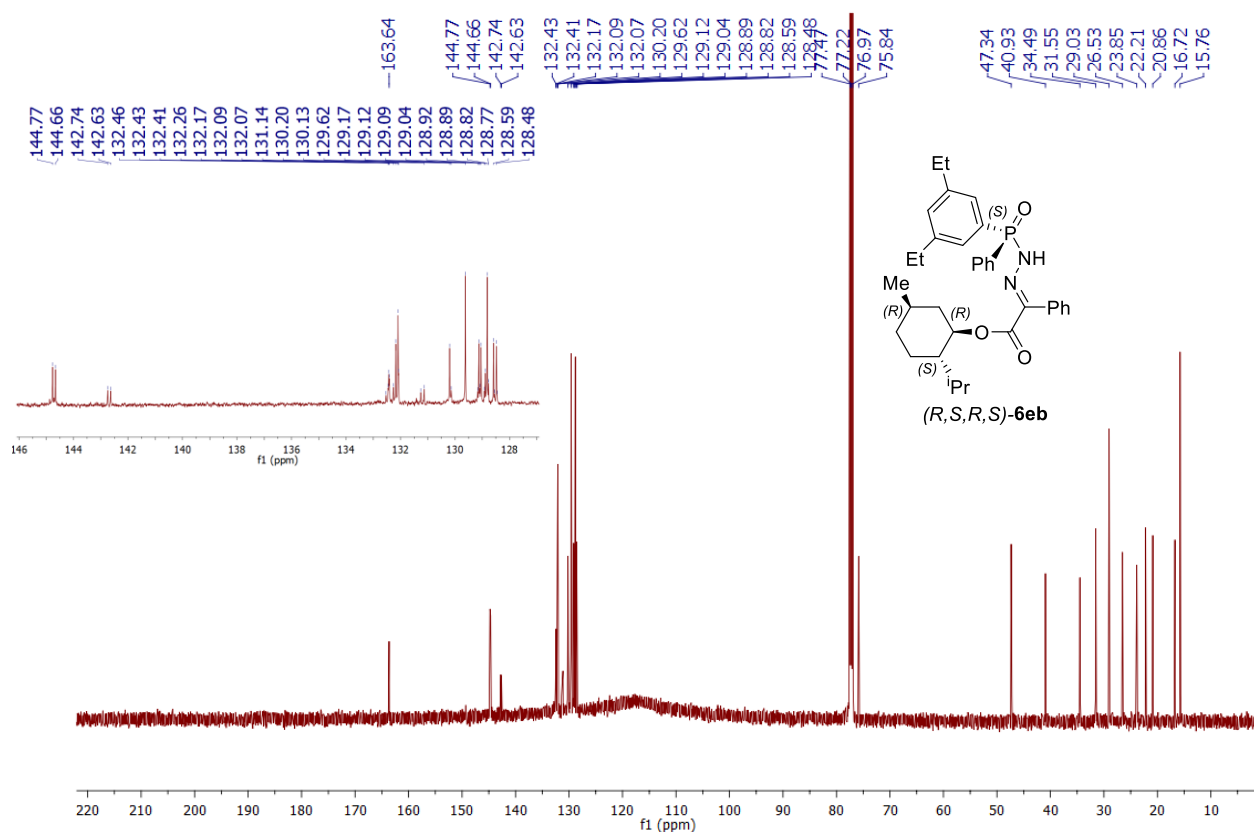

**Figure S66**  $^{31}\text{P}\{^1\text{H}\}$  NMR (162 MHz,  $\text{CDCl}_3$ , mixture,  $de=70\%$ ) spectrum of (*R,S,R,S*)-**6eb** (major isomer).

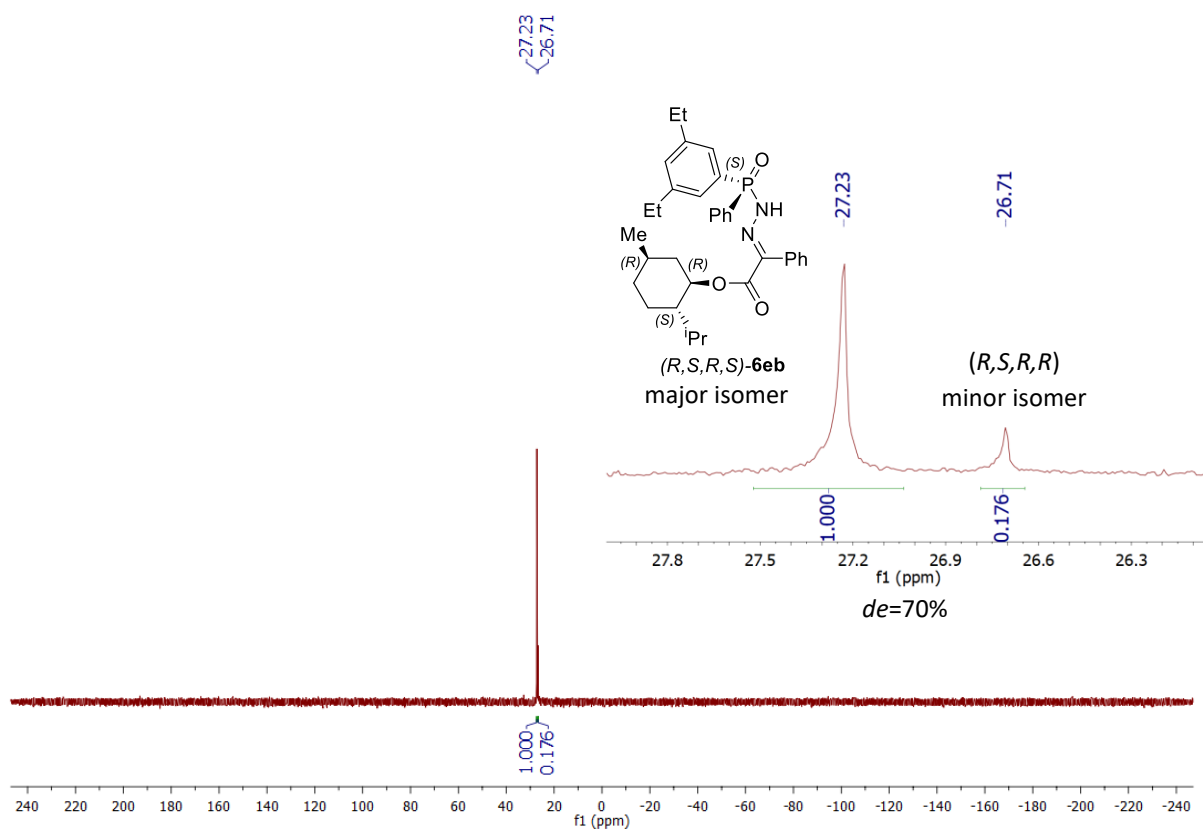

**Figure S67**  $^1\text{H}$  NMR (400 MHz,  $\text{CDCl}_3$ ) spectrum of **6ai**.

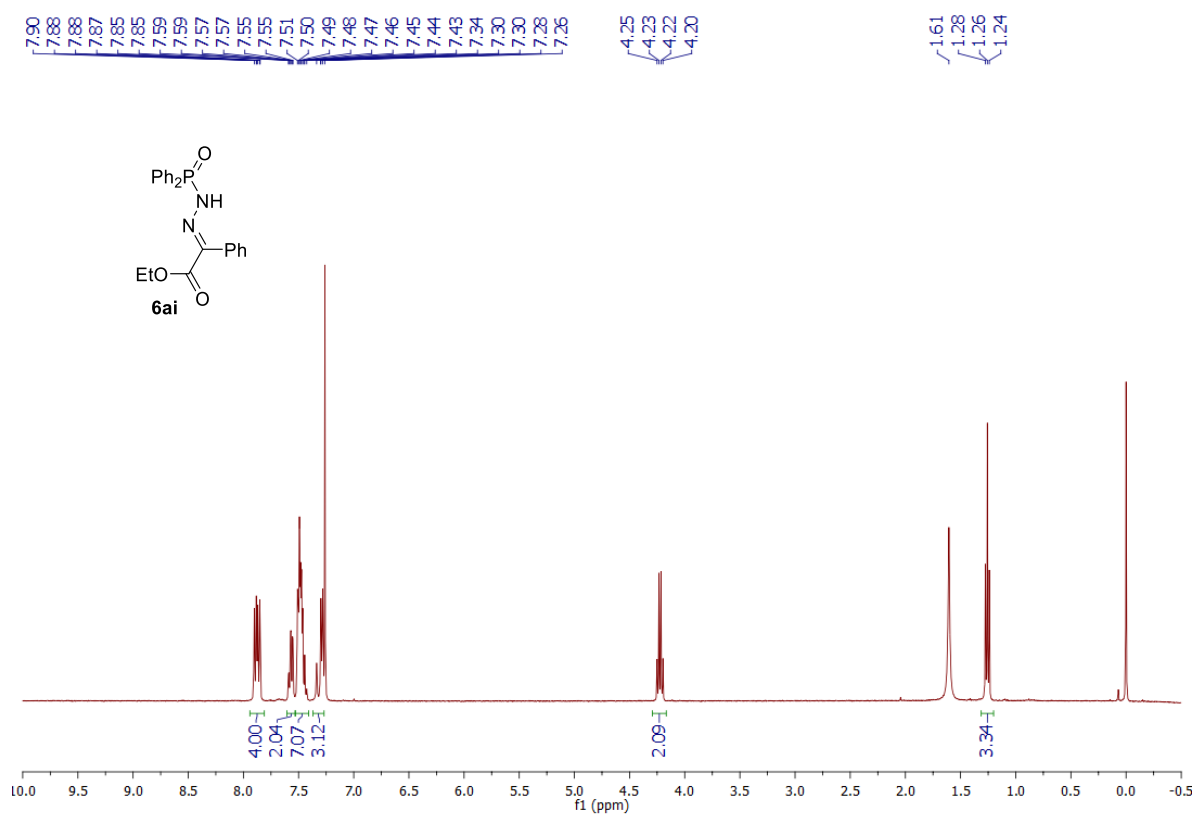

**Figure S68**  $^{13}\text{C}\{^1\text{H}\}$  NMR (126 MHz,  $\text{CDCl}_3$ ) spectrum of **6ai**.

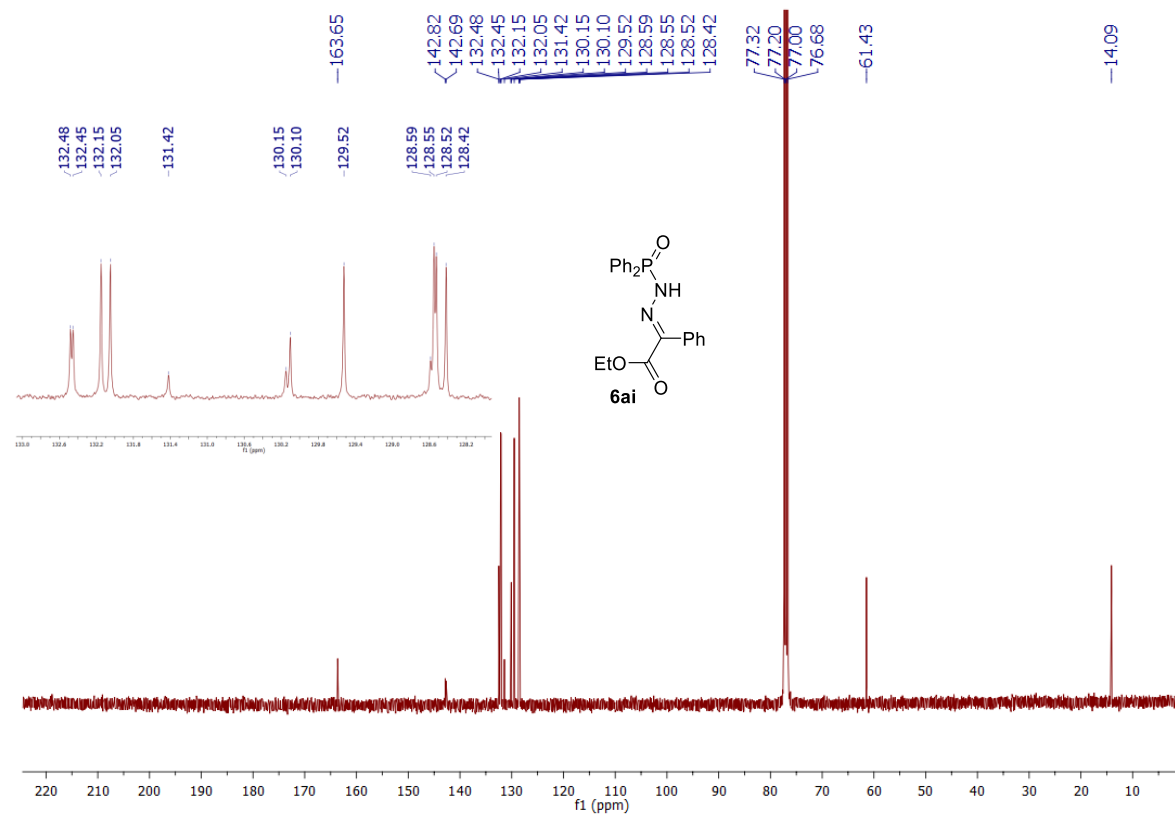

**Figure S69**  $^{31}\text{P}\{^1\text{H}\}$  NMR (162 MHz,  $\text{CDCl}_3$ ) spectrum of **6ai**.

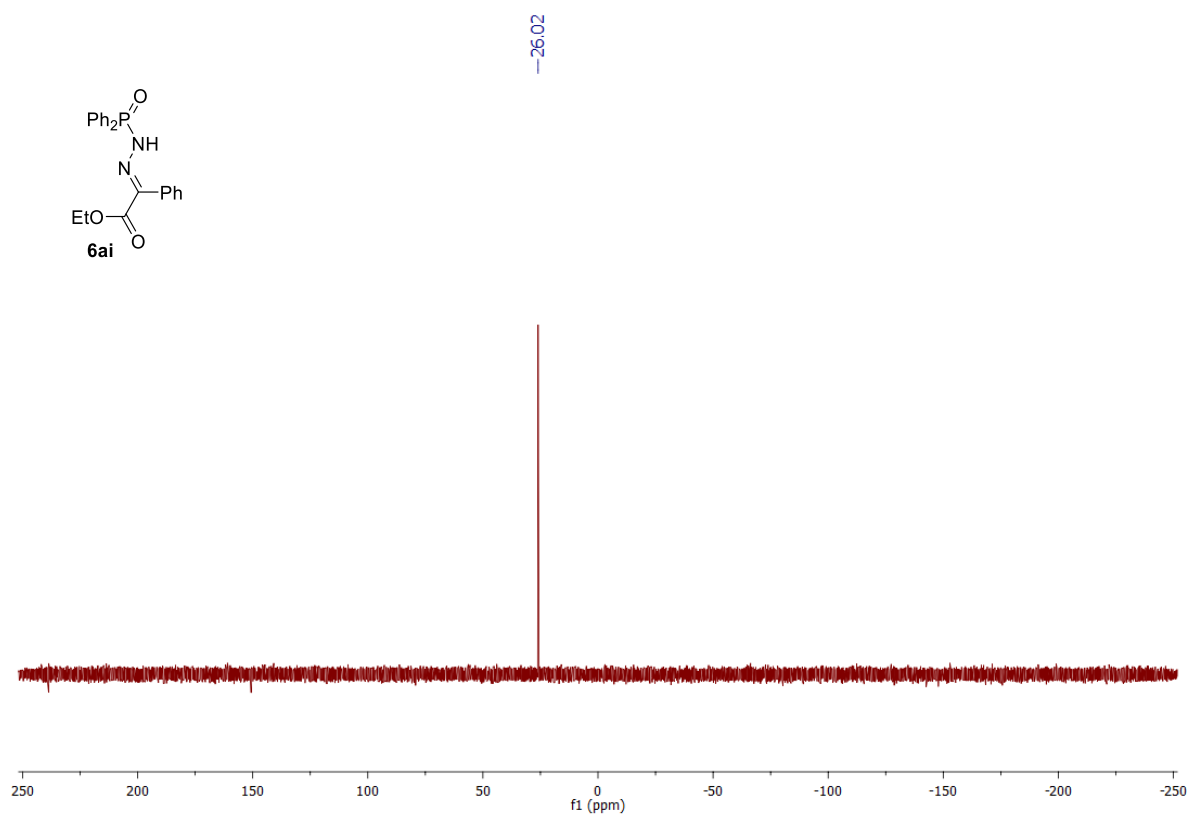

**Figure S70**  $^1\text{H}$  NMR (400 MHz,  $\text{CDCl}_3$ ) spectrum of **8a**.

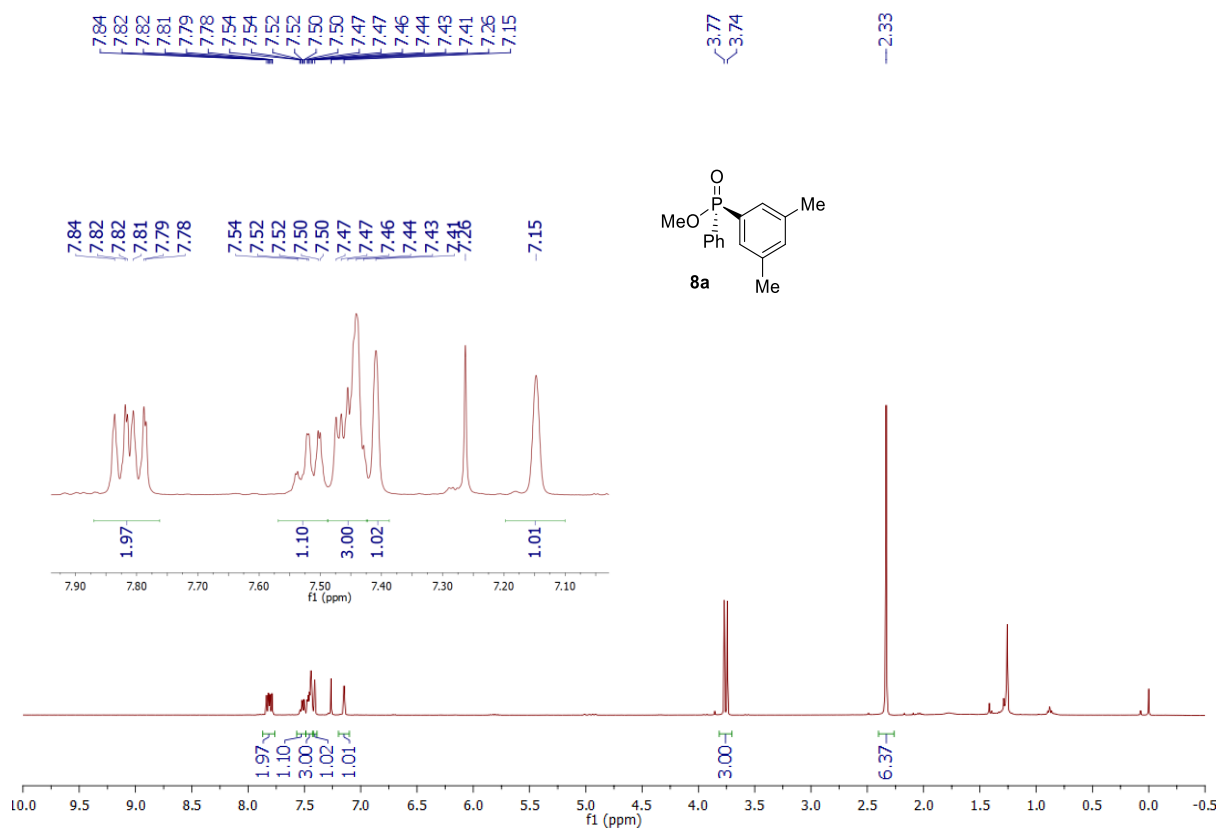

**Figure S71**  $^{13}\text{C}\{^1\text{H}\}$  NMR (101 MHz,  $\text{CDCl}_3$ ) spectrum **8a**.

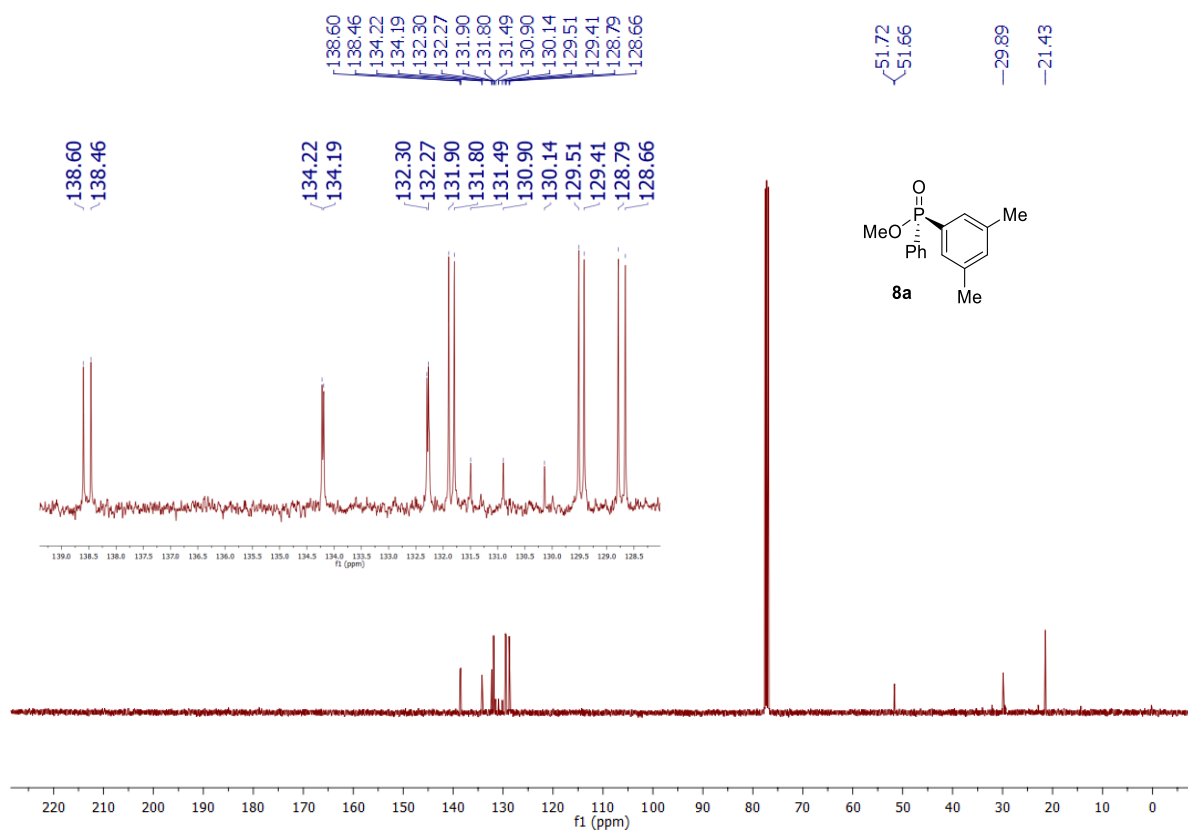

**Figure S72**  $^{31}\text{P}\{^1\text{H}\}$  NMR (162 MHz,  $\text{CDCl}_3$ ) spectrum of **8a**.

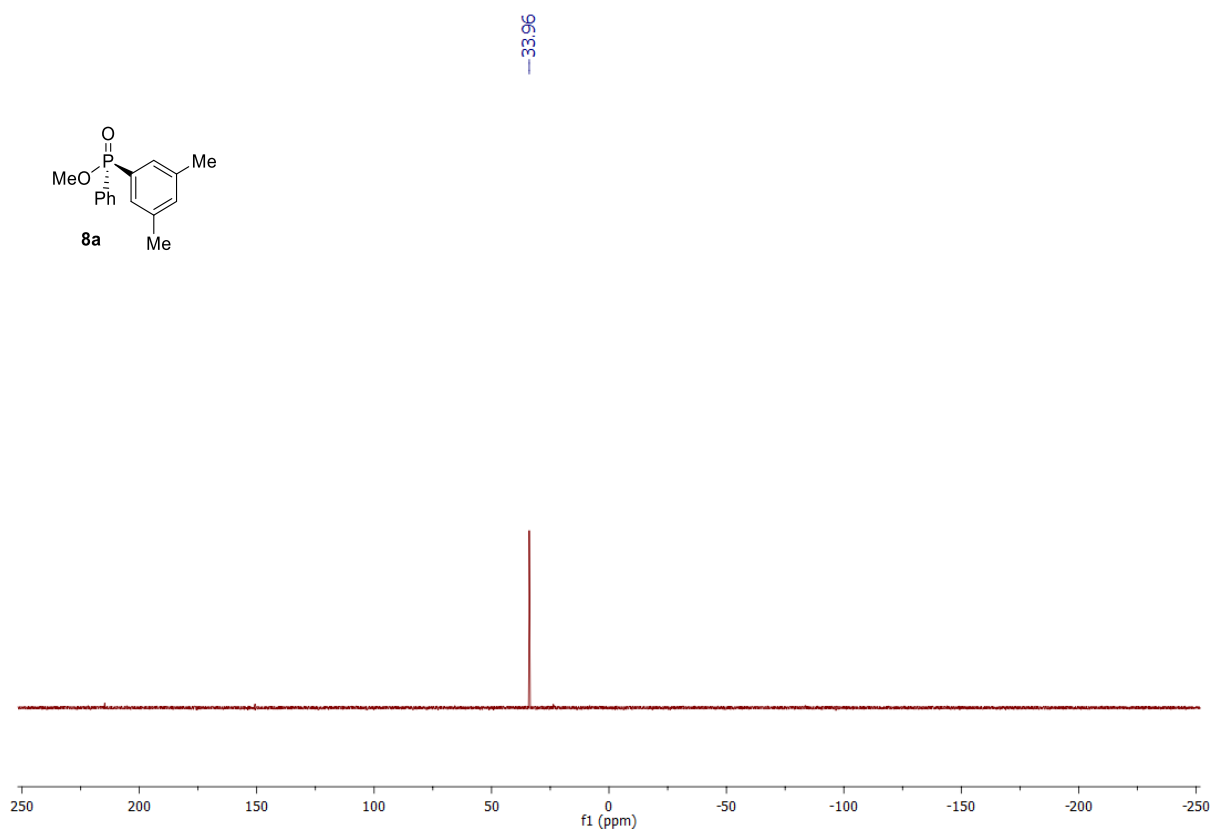

**Figure S73**  $^1\text{H}$  NMR (500 MHz,  $\text{CDCl}_3$ ) spectrum of **8b**.

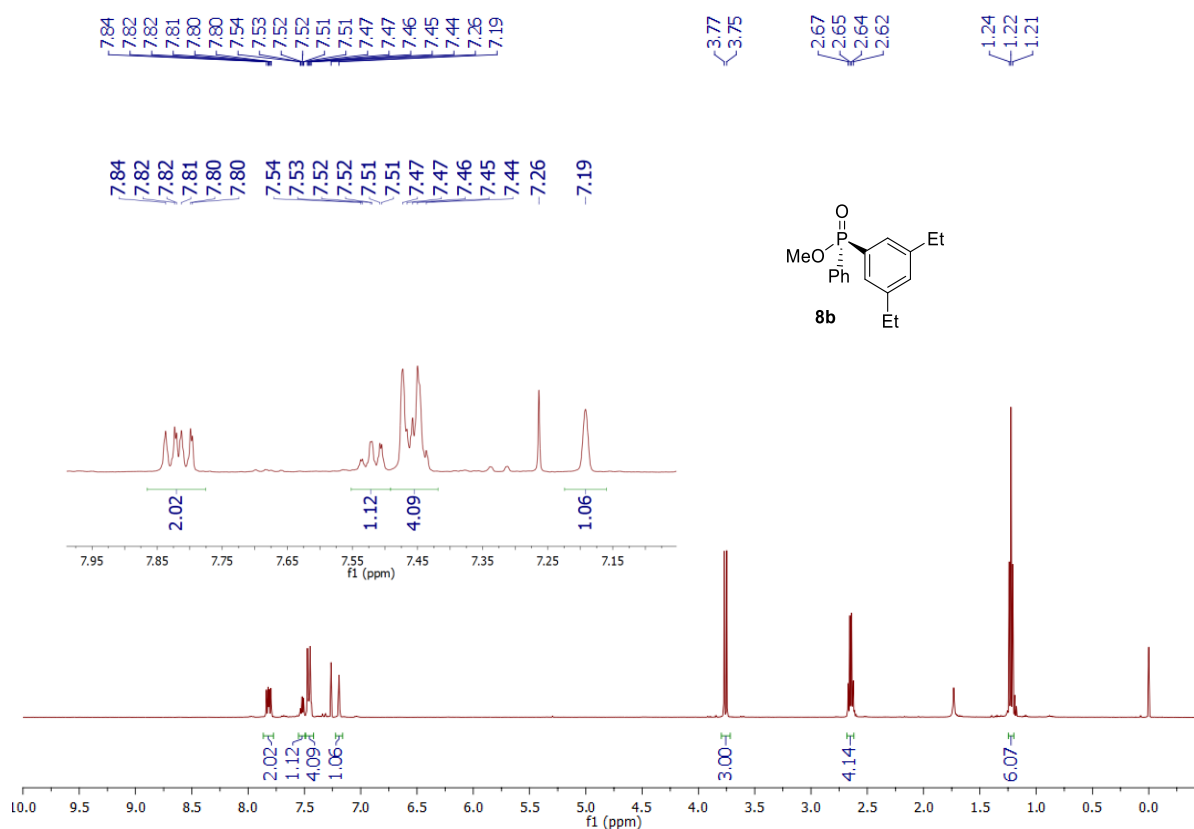

**Figure S74**  $^{13}\text{C}\{^1\text{H}\}$  NMR (126 MHz,  $\text{CDCl}_3$ ) spectrum of **8b**.

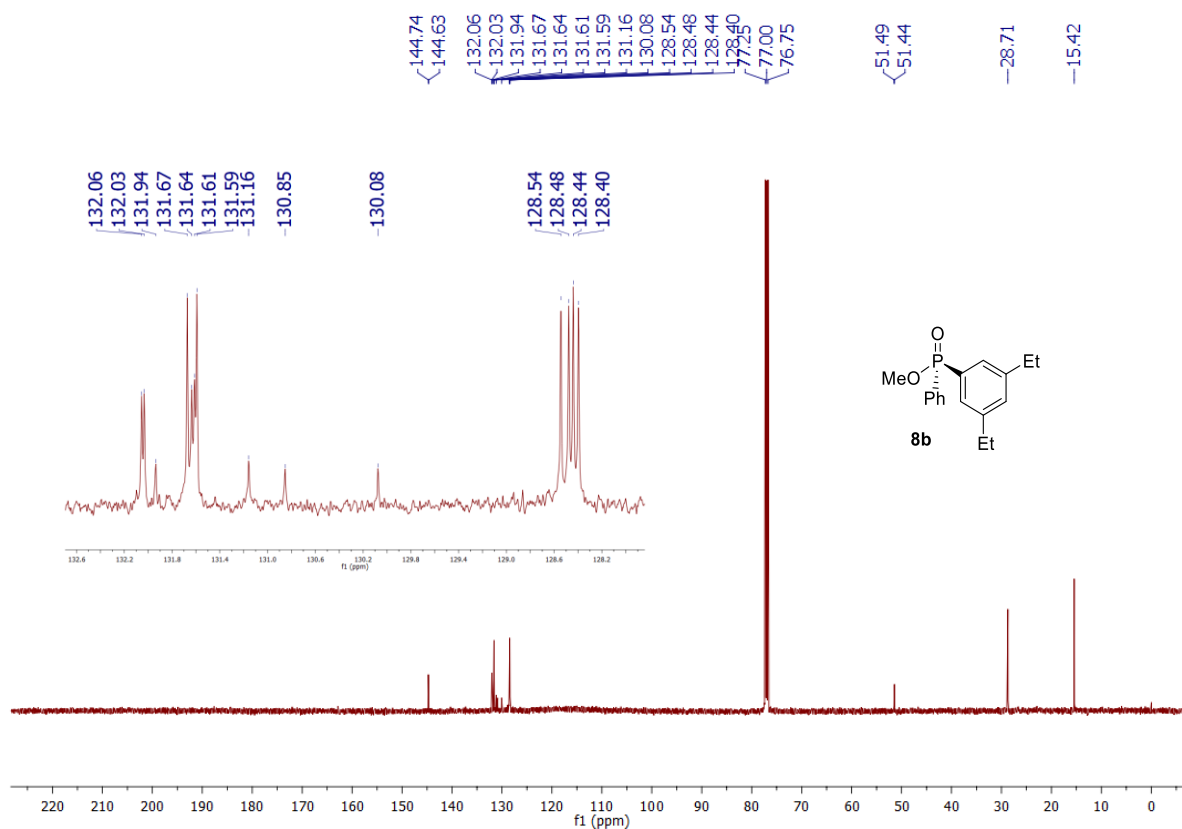

**Figure S75**  $^{31}\text{P}\{^1\text{H}\}$  NMR (162 MHz,  $\text{CDCl}_3$ ) spectrum of **8b**.

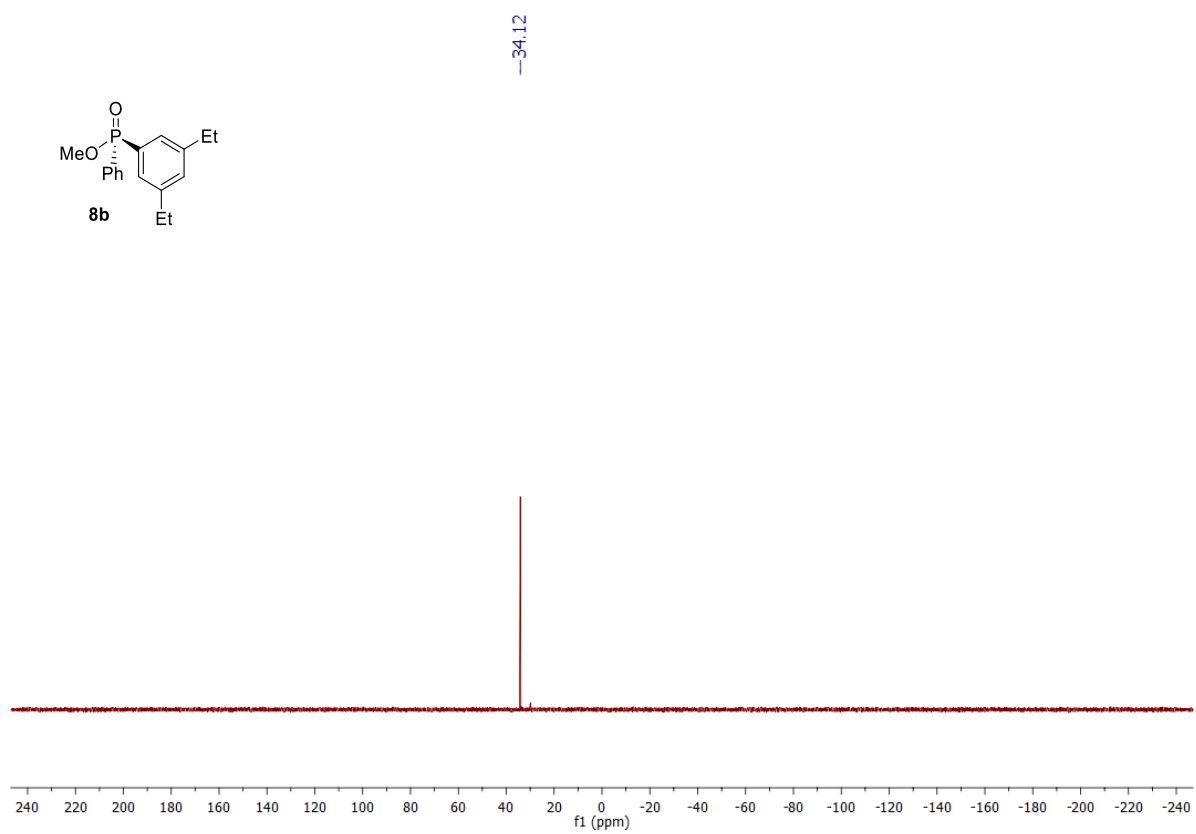



## 4. HPLC spectra

The enantioselectivities of the asymmetric hydrophosphination reactions were determined with Agilent 1200 Series HPLC machine fitted with specified Daicel Chiralpak columns eluted with a mixture of n-hexane/2-propanol. The samples were prepared in 2-propanol. The solvent peaks (if any) appear at the beginning of the HPLC spectra (within 6 minutes retention time).

**Figure S76** Racemic HPLC spectrum of **3aa**.

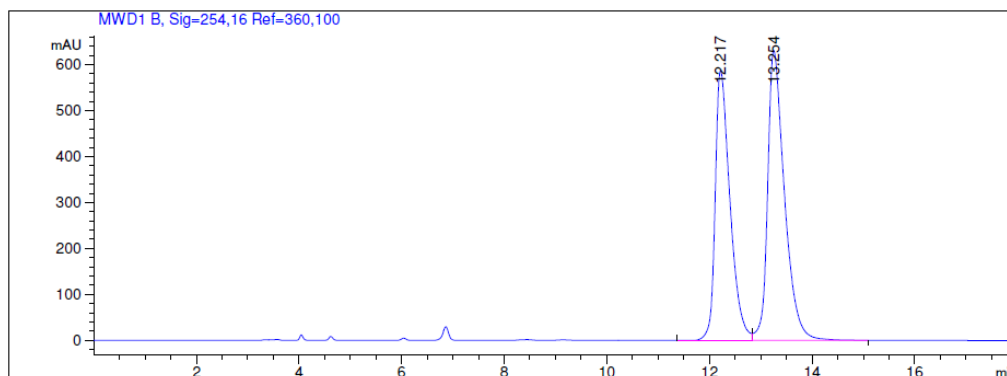

Signal 2: MWD1 B, Sig=254,16 Ref=360,100

| Peak # | RetTime [min] | Type | Width [min] | Area [mAU*s] | Height [mAU] | Area %  |
|--------|---------------|------|-------------|--------------|--------------|---------|
| 1      | 12.217        | BV   | 0.3018      | 1.17648e4    | 587.12177    | 45.0258 |
| 2      | 13.254        | VB   | 0.3379      | 1.43642e4    | 630.23212    | 54.9742 |

Totals : 2.61290e4 1217.35388

HPLC column: Daicel Chiralpak IE,

Temperature: 23 °C,

Flow rate: 1 ml/min.;

Eluent system: Hexane/IPA (90:10)

**Figure S77** Asymmetric HPLC spectrum of **3aa**.

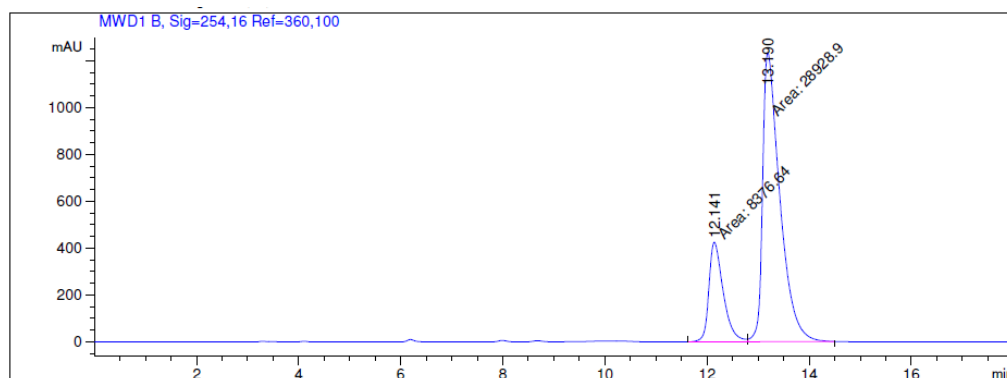

Signal 2: MWD1 B, Sig=254,16 Ref=360,100

| Peak # | RetTime [min] | Type | Width [min] | Area [mAU*s] | Height [mAU] | Area %  |
|--------|---------------|------|-------------|--------------|--------------|---------|
| 1      | 12.141        | MF   | 0.3276      | 8376.63672   | 426.15558    | 22.4541 |
| 2      | 13.190        | FM   | 0.3903      | 2.89289e4    | 1235.31592   | 77.5459 |

Totals : 3.73055e4 1661.47150

HPLC column: Daicel Chiralpak IE,

Temperature: 23 °C,

Flow rate: 1 ml/min.;

Eluent system: Hexane/IPA (90:10)

**ee=55%**

**Figure S78** Racemic HPLC spectrum of ( $\pm$ )-**6aa**.

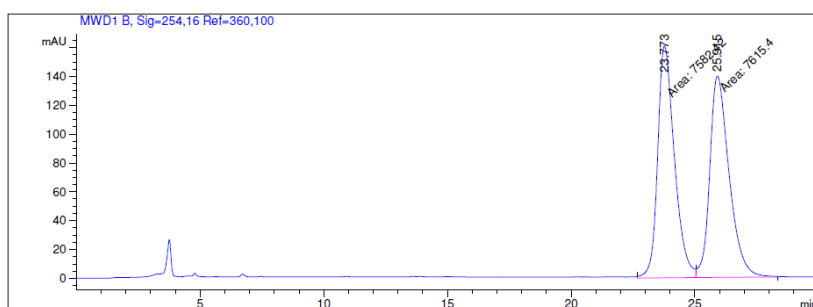

Signal 2: MWD1 B, Sig=254,16 Ref=360,100

| Peak # | RetTime [min] | Type | Width [min] | Area [mAU*s] | Height [mAU] | Area %  |
|--------|---------------|------|-------------|--------------|--------------|---------|
| 1      | 23.773        | MF   | 0.7859      | 7582.41943   | 160.80194    | 49.8915 |
| 2      | 25.915        | FM   | 0.9082      | 7615.40332   | 139.75473    | 50.1085 |

Totals : 1.51978e4 300.55667

HPLC column: Daicel Chiralpak IE,

Temperature: 23 °C,

Flow rate: 1 ml/min.;

Eluent system: Hexane/IPA (60:40)

**Figure S79** Asymmetric HPLC spectrum of (*R*)-**6aa**.

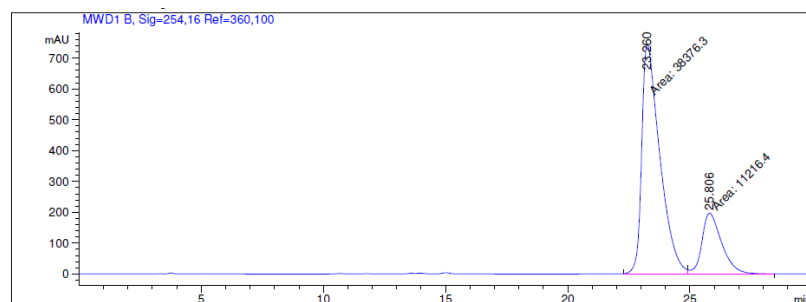

Signal 2: MWD1 B, Sig=254,16 Ref=360,100

| Peak # | RetTime [min] | Type | Width [min] | Area [mAU*s] | Height [mAU] | Area %  |
|--------|---------------|------|-------------|--------------|--------------|---------|
| 1      | 23.260        | MF   | 0.8581      | 3.83763e4    | 745.40894    | 77.3830 |
| 2      | 25.806        | FM   | 0.9460      | 1.12164e4    | 197.60953    | 22.6170 |

Totals : 4.95927e4 943.01846

HPLC column: Daicel Chiralpak IE,

Temperature: 23 °C,

Flow rate: 1 ml/min.;

Eluent system: Hexane/IPA (60:40), *ee*=55%

**Figure S80** Asymmetric HPLC spectrum of (*S*)-**6aa**.

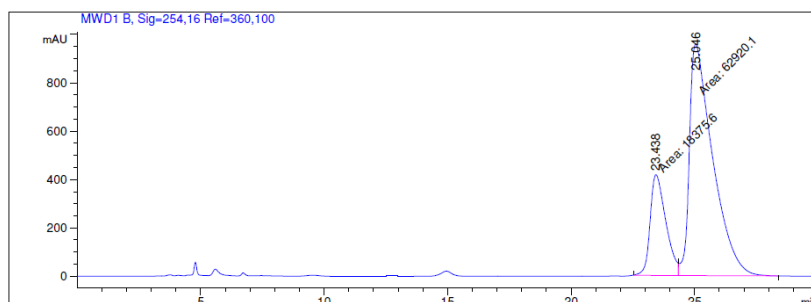

Signal 2: MWD1 B, Sig=254,16 Ref=360,100

| Peak # | RetTime [min] | Type | Width [min] | Area [mAU*s] | Height [mAU] | Area %  |
|--------|---------------|------|-------------|--------------|--------------|---------|
| 1      | 23.438        | MF   | 0.7345      | 1.83756e4    | 416.96457    | 22.6034 |
| 2      | 25.046        | FM   | 1.0941      | 6.29201e4    | 958.51306    | 77.3966 |

Totals : 8.12958e4 1375.47763

HPLC column: Daicel Chiralpak IE,

Temperature: 23 °C,

Flow rate: 1 ml/min.;

Eluent system: Hexane/IPA (60:40), *ee*=55%

(*S*)-**6aa** was synthesized by using (*S*)-CP (**4**) catalyst for the transformation.

**Figure S81** Racemic HPLC spectrum of ( $\pm$ )-6ba.

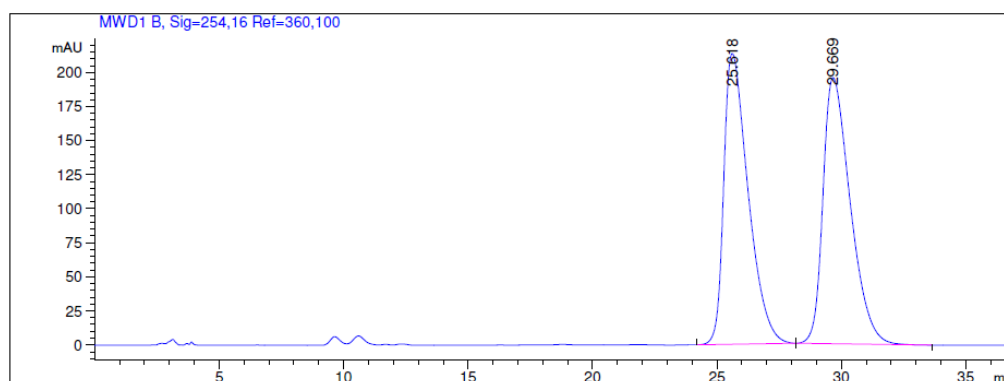

Signal 2: MWD1 B, Sig=254,16 Ref=360,100

| Peak # | RetTime [min] | Type | Width [min] | Area [mAU*s] | Height [mAU] | Area %  |
|--------|---------------|------|-------------|--------------|--------------|---------|
| 1      | 25.618        | BB   | 1.0221      | 1.45226e4    | 213.35637    | 49.3885 |
| 2      | 29.669        | BB   | 1.1612      | 1.48823e4    | 195.25903    | 50.6115 |

Totals : 2.94049e4 408.61540

HPLC column: Daicel Chiralpak IE,

Temperature: 23 °C,

Flow rate: 1.2 ml/min.;

Eluent system: Hexane/IPA (60:40)

**Figure S82** Asymmetric HPLC spectrum of (*R*)-6ba.

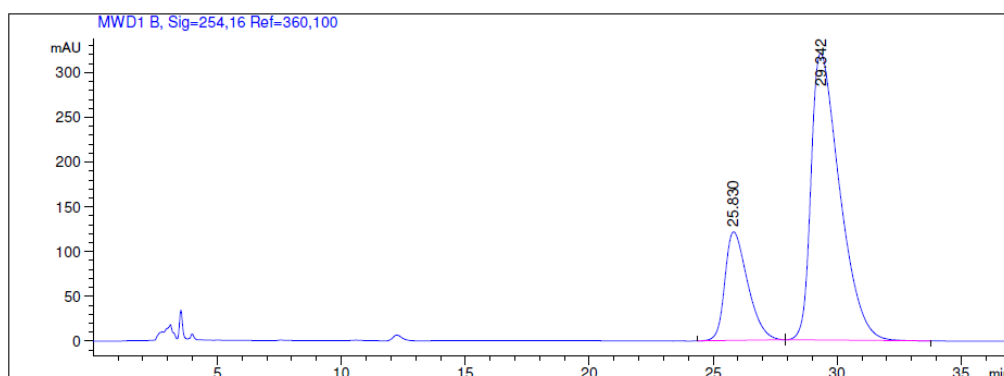

Signal 2: MWD1 B, Sig=254,16 Ref=360,100

| Peak # | RetTime [min] | Type | Width [min] | Area [mAU*s] | Height [mAU] | Area %  |
|--------|---------------|------|-------------|--------------|--------------|---------|
| 1      | 25.830        | BB   | 0.9731      | 7747.16357   | 121.29618    | 23.0847 |
| 2      | 29.342        | BB   | 1.2283      | 2.58126e4    | 320.25778    | 76.9153 |

Totals : 3.35598e4 441.55396

HPLC column: Daicel Chiralpak IE,

Temperature: 23 °C,

Flow rate: 1.2 ml/min.;

Eluent system: Hexane/IPA (60:40)

**ee=54%**

**Figure S83** Racemic HPLC spectrum of ( $\pm$ )-6ca.

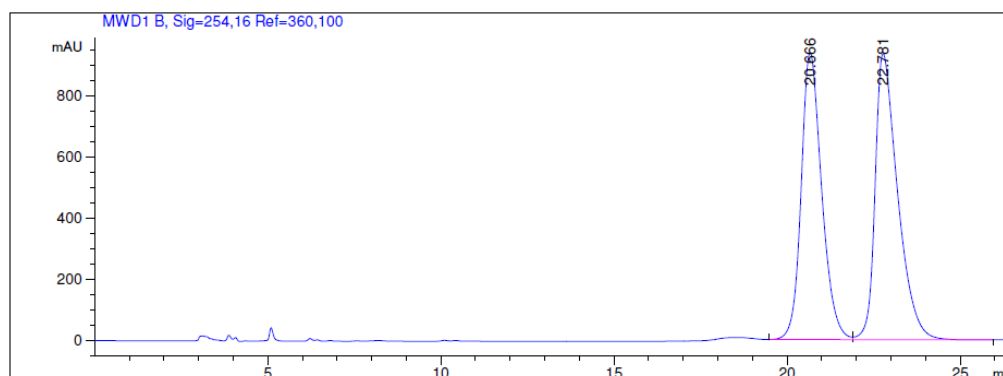

Signal 2: MWD1 B, Sig=254,16 Ref=360,100

| Peak # | RetTime [min] | Type | Width [min] | Area [mAU*s] | Height [mAU] | Area %  |
|--------|---------------|------|-------------|--------------|--------------|---------|
| 1      | 20.666        | BV   | 0.6264      | 3.86713e4    | 939.17560    | 47.7025 |
| 2      | 22.781        | VB   | 0.6721      | 4.23965e4    | 936.62646    | 52.2975 |

Totals : 8.10678e4 1875.80206

HPLC column: Daicel Chiralpak IE,

Temperature: 23 °C,

Flow rate: 1 ml/min.;

Eluent system: Hexane/IPA (70:30)

**Figure S84** Asymmetric HPLC spectrum of (*R*)-6ca.

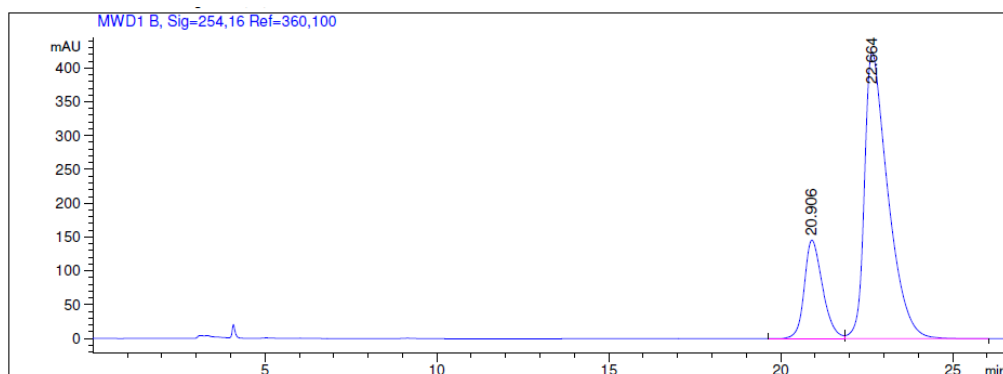

Signal 2: MWD1 B, Sig=254,16 Ref=360,100

| Peak # | RetTime [min] | Type | Width [min] | Area [mAU*s] | Height [mAU] | Area %  |
|--------|---------------|------|-------------|--------------|--------------|---------|
| 1      | 20.906        | BV   | 0.5628      | 5405.74219   | 145.71727    | 21.2099 |
| 2      | 22.664        | VB   | 0.6971      | 2.00812e4    | 423.53925    | 78.7901 |

Totals : 2.54869e4 569.25652

HPLC column: Daicel Chiralpak IE,

Temperature: 23 °C,

Flow rate: 1 ml/min.;

Eluent system: Hexane/IPA (70:30)

**ee=58%**

**Figure S85** Racemic HPLC spectrum of ( $\pm$ )-**6cb**.

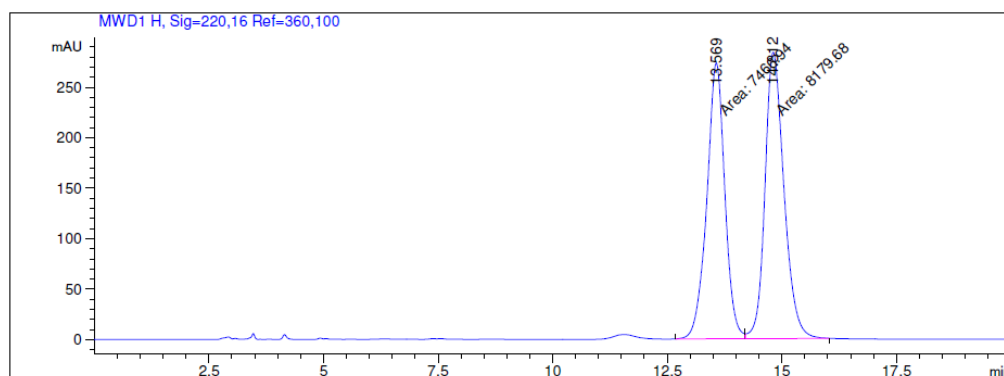

Signal 8: MWD1 H, Sig=220,16 Ref=360,100

| Peak # | RetTime [min] | Type | Width [min] | Area [mAU*s] | Height [mAU] | Area %  |
|--------|---------------|------|-------------|--------------|--------------|---------|
| 1      | 13.569        | MF   | 0.4553      | 7466.93555   | 273.31036    | 47.7224 |
| 2      | 14.812        | FM   | 0.4806      | 8179.67773   | 283.66522    | 52.2776 |

Totals : 1.56466e4 556.97559

HPLC column: Daicel Chiralpak ID,

Temperature: 23 °C,

Flow rate: 1 ml/min.;

Eluent system: Hexane/IPA (85:15)

**Figure S86** Asymmetric HPLC spectrum of (*R*)-**6cb**.

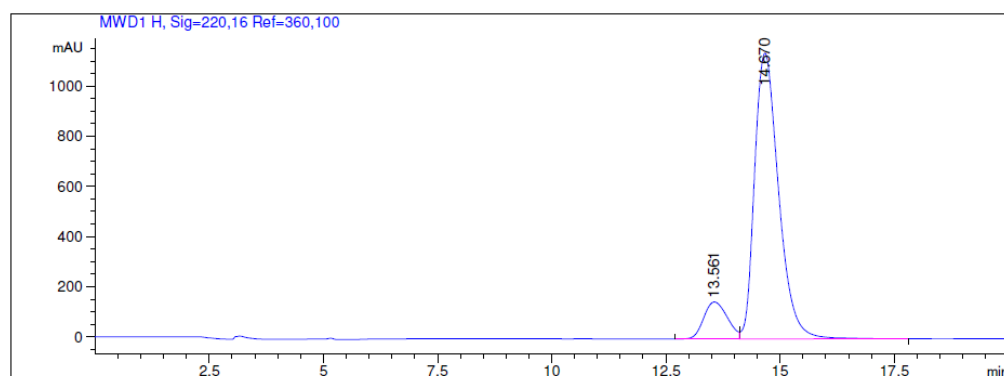

Signal 8: MWD1 H, Sig=220,16 Ref=360,100

| Peak # | RetTime [min] | Type | Width [min] | Area [mAU*s] | Height [mAU] | Area %  |
|--------|---------------|------|-------------|--------------|--------------|---------|
| 1      | 13.561        | BV   | 0.5744      | 5244.36475   | 146.94856    | 11.1906 |
| 2      | 14.670        | VB   | 0.5666      | 41619.84     | 1138.20630   | 88.8094 |

Totals : 4.68641e4 1285.15486

HPLC column: Daicel Chiralpak ID,

Temperature: 23 °C,

Flow rate: 1 ml/min.;

Eluent system: Hexane/IPA (85:15)

**ee=78%**

**Figure S87** Racemic HPLC spectrum of ( $\pm$ )-6db.

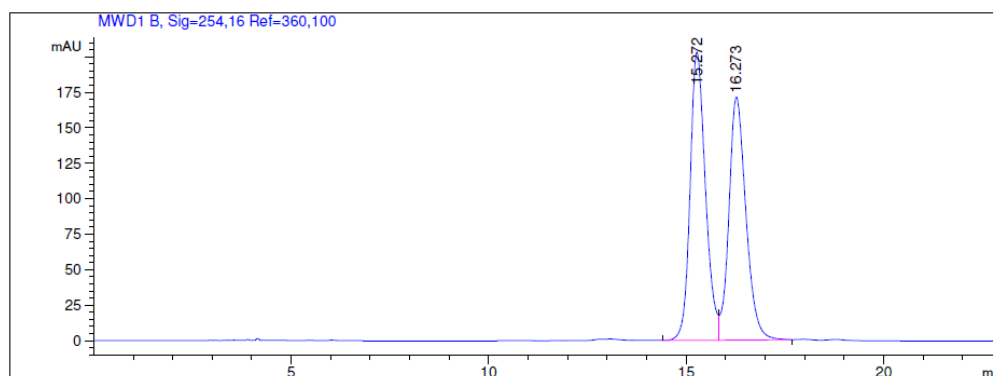

Signal 2: MWD1 B, Sig=254,16 Ref=360,100

| Peak # | RetTime [min] | Type | Width [min] | Area [mAU*s] | Height [mAU] | Area %  |
|--------|---------------|------|-------------|--------------|--------------|---------|
| 1      | 15.272        | BV   | 0.4117      | 5494.72266   | 203.07724    | 51.7554 |
| 2      | 16.273        | VB   | 0.4529      | 5121.99072   | 171.25340    | 48.2446 |

Totals : 1.06167e4 374.33064

HPLC column: Daicel Chiralpak ID,

Temperature: 23 °C,

Flow rate: 1 ml/min.;

Eluent system: Hexane/IPA (70:30)

**Figure S88** Asymmetric HPLC spectrum of (*R*)-6db.

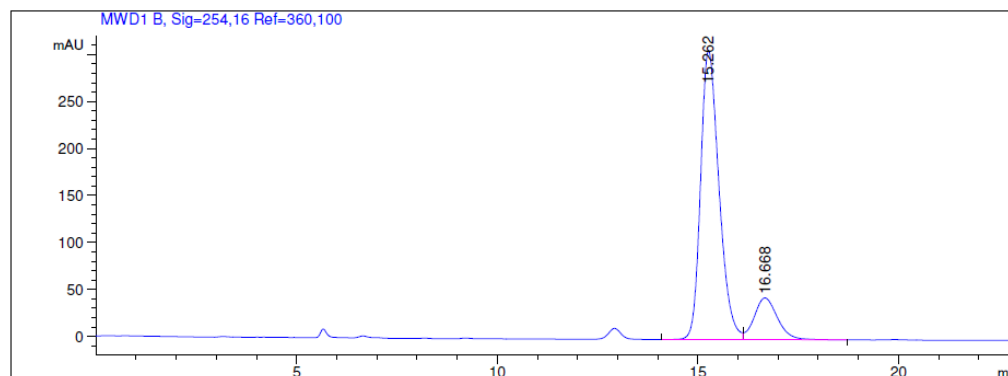

Signal 2: MWD1 B, Sig=254,16 Ref=360,100

| Peak # | RetTime [min] | Type | Width [min] | Area [mAU*s] | Height [mAU] | Area %  |
|--------|---------------|------|-------------|--------------|--------------|---------|
| 1      | 15.262        | BV   | 0.4900      | 9807.07129   | 307.53119    | 84.5465 |
| 2      | 16.668        | VB   | 0.6190      | 1792.54114   | 44.40107     | 15.4535 |

Totals : 1.15996e4 351.93226

HPLC column: Daicel Chiralpak ID,

Temperature: 23 °C,

Flow rate: 1 ml/min.;

Eluent system: Hexane/IPA (70:30)

**ee=69%**

**Figure S89** Racemic HPLC spectrum of ( $\pm$ )-6bc.

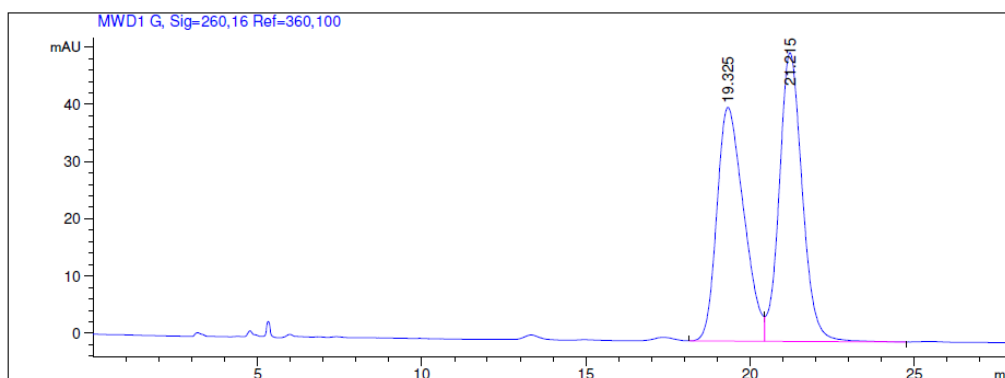

Signal 7: MWD1 G, Sig=260,16 Ref=360,100

| Peak # | RetTime [min] | Type | Width [min] | Area [mAU*s] | Height [mAU] | Area %  |
|--------|---------------|------|-------------|--------------|--------------|---------|
| 1      | 19.325        | BV   | 0.8558      | 2324.90698   | 40.86178     | 48.6929 |
| 2      | 21.215        | VB   | 0.7443      | 2449.72754   | 50.46722     | 51.3071 |

Totals : 4774.63452 91.32900

HPLC column: Daicel Chiralpak ID,

Temperature: 23 °C,

Flow rate: 1 ml/min.;

Eluent system: Hexane/IPA (85:15)

**Figure S90** Asymmetric HPLC spectrum of (*R*)-6bc.

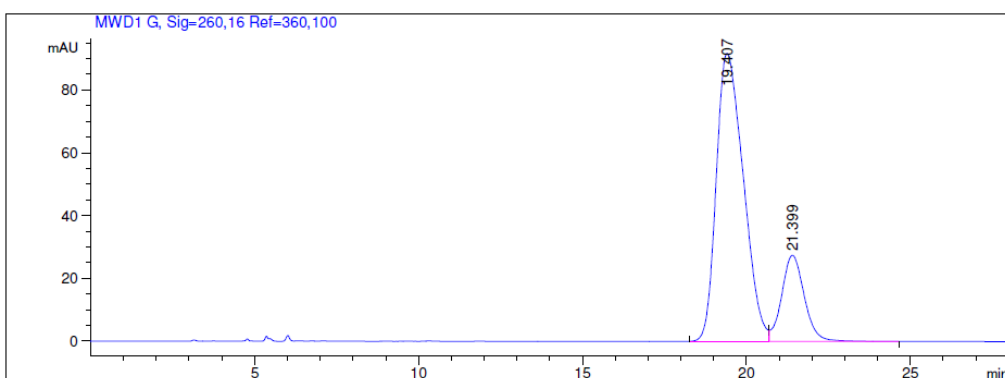

Signal 7: MWD1 G, Sig=260,16 Ref=360,100

| Peak # | RetTime [min] | Type | Width [min] | Area [mAU*s] | Height [mAU] | Area %  |
|--------|---------------|------|-------------|--------------|--------------|---------|
| 1      | 19.407        | BV   | 0.9330      | 5259.21338   | 91.72038     | 80.0109 |
| 2      | 21.399        | VB   | 0.7311      | 1313.90942   | 27.41863     | 19.9891 |

Totals : 6573.12280 119.13901

HPLC column: Daicel Chiralpak ID,

Temperature: 23 °C,

Flow rate: 1 ml/min.;

Eluent system: Hexane/IPA (85:15)

**ee=60%**

**Figure S91** Racemic HPLC spectrum of ( $\pm$ )-6cc.

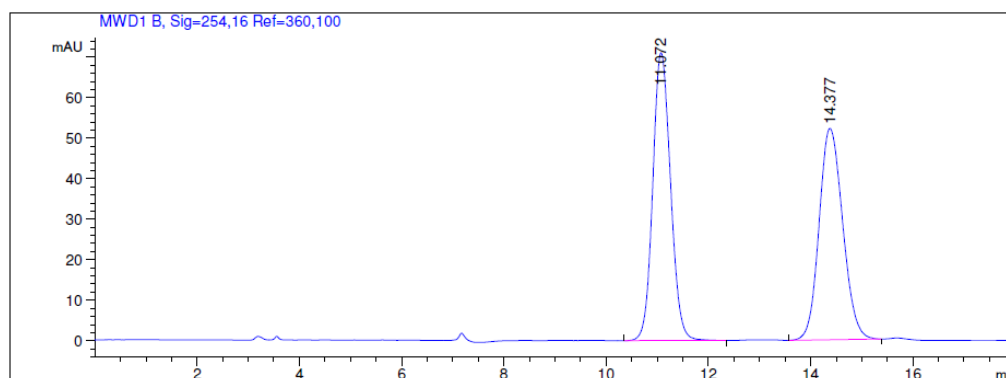

Signal 2: MWD1 B, Sig=254,16 Ref=360,100

| Peak # | RetTime [min] | Type | Width [min] | Area [mAU*s] | Height [mAU] | Area %  |
|--------|---------------|------|-------------|--------------|--------------|---------|
| 1      | 11.072        | BB   | 0.3776      | 1715.34119   | 71.07420     | 50.6176 |
| 2      | 14.377        | BB   | 0.5001      | 1673.48218   | 52.18726     | 49.3824 |

Totals : 3388.82336 123.26146

HPLC column: Daicel Chiralpak ID,

Temperature: 23 °C,

Flow rate: 1 ml/min.;

Eluent system: Hexane/IPA (90:10)

**Figure S92** Asymmetric HPLC spectrum of (*R*)-6cc.

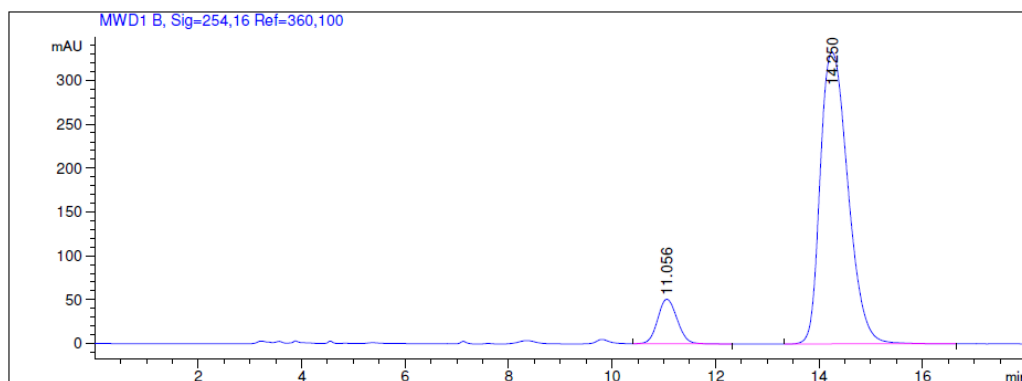

Signal 2: MWD1 B, Sig=254,16 Ref=360,100

| Peak # | RetTime [min] | Type | Width [min] | Area [mAU*s] | Height [mAU] | Area %  |
|--------|---------------|------|-------------|--------------|--------------|---------|
| 1      | 11.056        | BB   | 0.4078      | 1321.46460   | 50.75365     | 9.6500  |
| 2      | 14.250        | BB   | 0.5858      | 1.23725e4    | 332.73782    | 90.3500 |

Totals : 1.36940e4 383.49147

HPLC column: Daicel Chiralpak ID,

Temperature: 23 °C,

Flow rate: 1 ml/min.;

Eluent system: Hexane/IPA (90:10)

**ee=81%**



**Figure S93** Racemic HPLC spectrum of ( $\pm$ )-**6cd**.

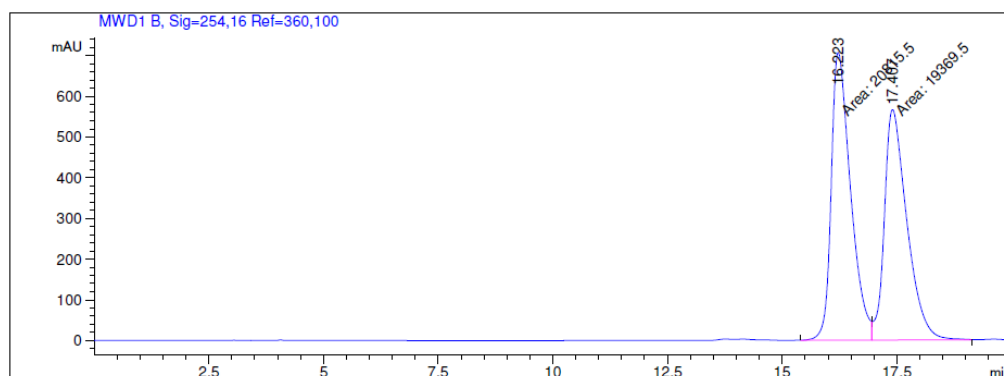

Signal 2: MWD1 B, Sig=254,16 Ref=360,100

| Peak # | RetTime [min] | Type | Width [min] | Area [mAU*s] | Height [mAU] | Area %  |
|--------|---------------|------|-------------|--------------|--------------|---------|
| 1      | 16.223        | MF   | 0.4906      | 2.08155e4    | 707.11145    | 51.7992 |
| 2      | 17.407        | FM   | 0.5699      | 1.93695e4    | 566.47260    | 48.2008 |

Totals : 4.01849e4 1273.58405

HPLC column: Daicel Chiralpak IE,

Temperature: 23 °C,

Flow rate: 1 ml/min.;

Eluent system: Hexane/IPA (70:30)

**Figure S94** Asymmetric HPLC spectrum of (*R*)-**6cd**.

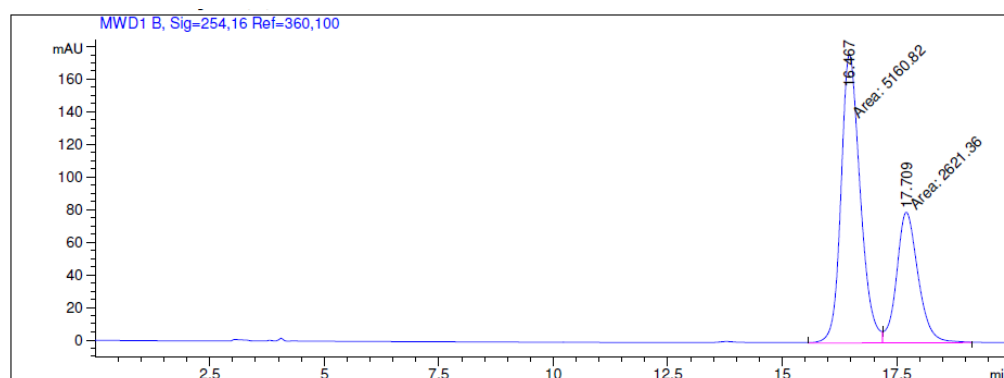

Signal 2: MWD1 B, Sig=254,16 Ref=360,100

| Peak # | RetTime [min] | Type | Width [min] | Area [mAU*s] | Height [mAU] | Area %  |
|--------|---------------|------|-------------|--------------|--------------|---------|
| 1      | 16.467        | MF   | 0.4861      | 5160.81934   | 176.96373    | 66.3159 |
| 2      | 17.709        | FM   | 0.5454      | 2621.35669   | 80.10585     | 33.6841 |

Totals : 7782.17603 257.06958

HPLC column: Daicel Chiralpak IE,

Temperature: 23 °C,

Flow rate: 1 ml/min.;

Eluent system: Hexane/IPA (70:30)

**ee=33%**

**Figure S95** Racemic HPLC spectrum of ( $\pm$ )-**6ce**.

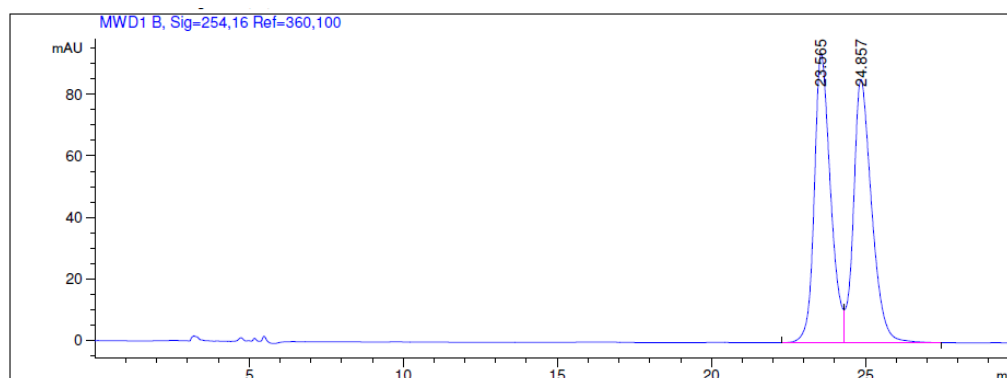

Signal 2: MWD1 B, Sig=254,16 Ref=360,100

| Peak # | RetTime [min] | Type | Width [min] | Area [mAU*s] | Height [mAU] | Area %  |
|--------|---------------|------|-------------|--------------|--------------|---------|
| 1      | 23.565        | BV   | 0.5544      | 3449.41113   | 93.93780     | 49.6534 |
| 2      | 24.857        | VB   | 0.6107      | 3497.56641   | 85.60771     | 50.3466 |

Totals : 6946.97754 179.54551

HPLC column: Daicel Chiralpak IE,

Temperature: 23 °C,

Flow rate: 1 ml/min.;

Eluent system: Hexane/IPA (85:15)

**Figure S96** Asymmetric HPLC spectrum of (*S*)-**6ce**.

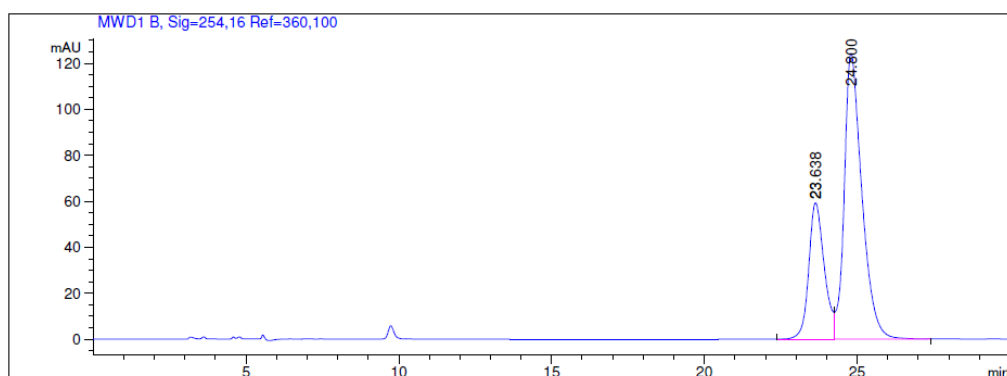

Signal 2: MWD1 B, Sig=254,16 Ref=360,100

| Peak # | RetTime [min] | Type | Width [min] | Area [mAU*s] | Height [mAU] | Area %  |
|--------|---------------|------|-------------|--------------|--------------|---------|
| 1      | 23.638        | BV   | 0.5345      | 2097.96777   | 59.33110     | 29.6196 |
| 2      | 24.800        | VB   | 0.5957      | 4985.08008   | 124.35921    | 70.3804 |

Totals : 7083.04785 183.69032

HPLC column: Daicel Chiralpak IE,

Temperature: 23 °C,

Flow rate: 1 ml/min.;

Eluent system: Hexane/IPA (85:15)

**ee=41%**

**Figure S97** Racemic HPLC spectrum of ( $\pm$ )-**8a**.

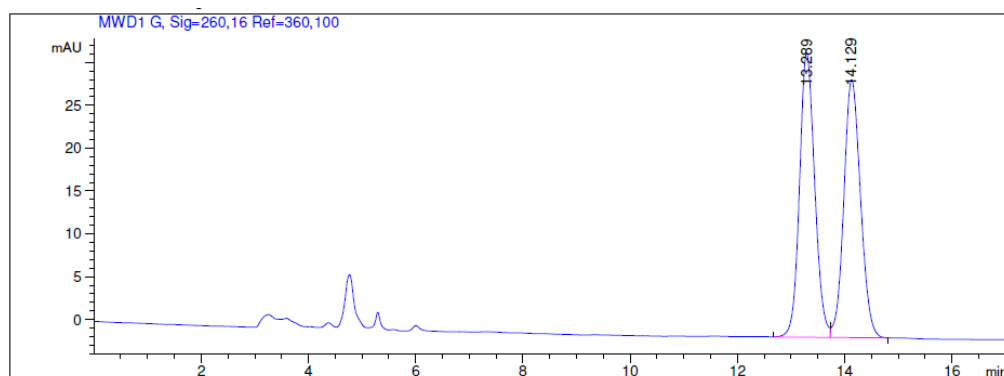

Signal 7: MWD1 G, Sig=260,16 Ref=360,100

| Peak # | RetTime [min] | Type | Width [min] | Area [mAU*s] | Height [mAU] | Area %  |
|--------|---------------|------|-------------|--------------|--------------|---------|
| 1      | 13.289        | BV   | 0.3039      | 653.49774    | 33.16544     | 50.0957 |
| 2      | 14.129        | VB   | 0.3361      | 651.00208    | 30.12320     | 49.9043 |

Totals : 1304.49982 63.28863

HPLC column: Daicel Chiralpak ID,

Temperature: 23 °C,

Flow rate: 1 ml/min.;

Eluent system: Hexane/IPA (85:15)

**Figure S98** Asymmetric HPLC spectrum of (*R*)-**8a**.

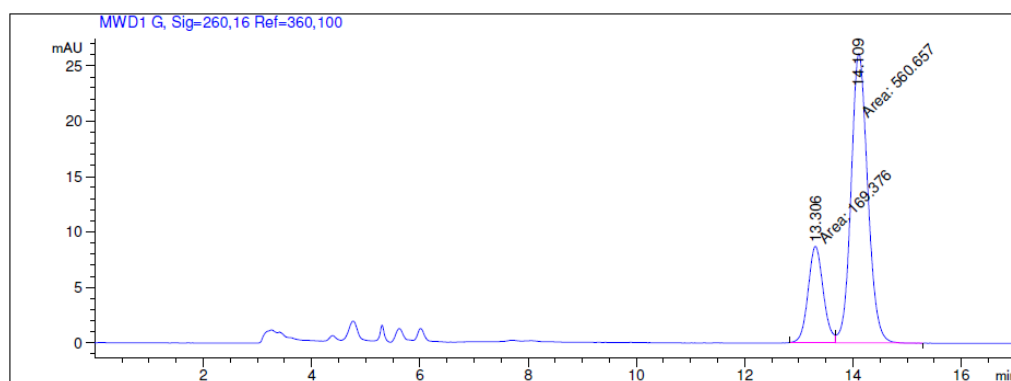

Signal 7: MWD1 G, Sig=260,16 Ref=360,100

| Peak # | RetTime [min] | Type | Width [min] | Area [mAU*s] | Height [mAU] | Area %  |
|--------|---------------|------|-------------|--------------|--------------|---------|
| 1      | 13.306        | MF   | 0.3243      | 169.37553    | 8.70529      | 23.2011 |
| 2      | 14.109        | FM   | 0.3577      | 560.65686    | 26.12079     | 76.7989 |

Totals : 730.03239 34.82608

HPLC column: Daicel Chiralpak ID,

Temperature: 23 °C,

Flow rate: 1 ml/min.;

Eluent system: Hexane/IPA (85:15)

**ee=54%**

**Figure S99** Racemic HPLC spectrum of ( $\pm$ )-**8b**.

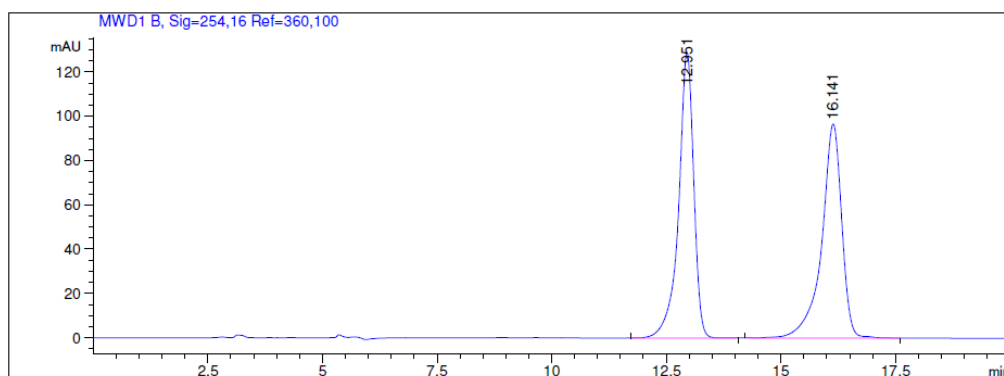

Signal 2: MWD1 B, Sig=254,16 Ref=360,100

| Peak # | RetTime [min] | Type | Width [min] | Area [mAU*s] | Height [mAU] | Area %  |
|--------|---------------|------|-------------|--------------|--------------|---------|
| 1      | 12.951        | BB   | 0.3441      | 2964.41333   | 129.00148    | 50.1043 |
| 2      | 16.141        | BB   | 0.4523      | 2952.06616   | 96.66156     | 49.8957 |

Totals : 5916.47949 225.66304

HPLC column: Daicel Chiralpak IC,

Temperature: 23 °C,

Flow rate: 1 ml/min.;

Eluent system: Hexane/IPA (80:20)

**Figure S100** Asymmetric HPLC spectrum of (*R*)-**8b**.

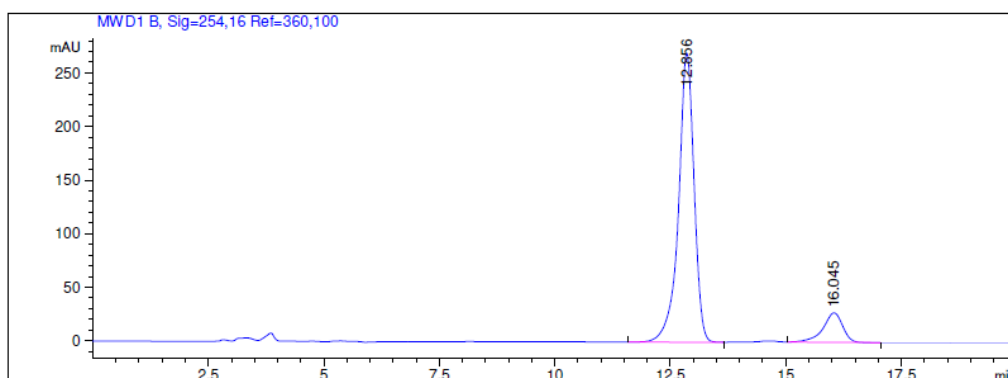

Signal 2: MWD1 B, Sig=254,16 Ref=360,100

| Peak # | RetTime [min] | Type | Width [min] | Area [mAU*s] | Height [mAU] | Area %  |
|--------|---------------|------|-------------|--------------|--------------|---------|
| 1      | 12.856        | BB   | 0.3536      | 6324.26270   | 269.68747    | 88.5531 |
| 2      | 16.045        | BB   | 0.4460      | 817.51233    | 27.56480     | 11.4469 |

Totals : 7141.77502 297.25227

HPLC column: Daicel Chiralpak IC,

Temperature: 23 °C,

Flow rate: 1 ml/min.;

Eluent system: Hexane/IPA (80:20)

**ee=77%**

## 5. Stereochemical investigation on 6eb.

### Experiment 1:

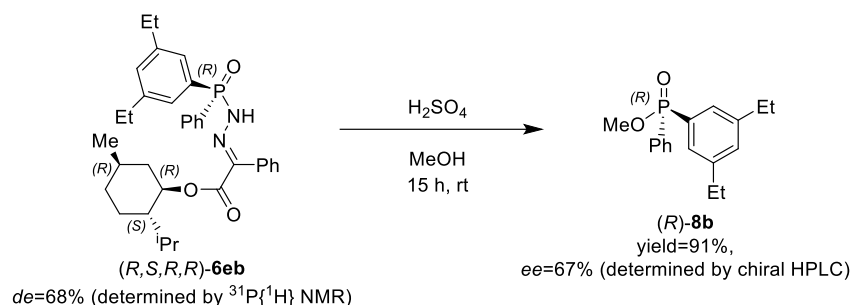

To identify the stereochemistry of the generated **6eb** diastereomers at the first place, the isolated compounds were transformed to diarylphosphinates via acidic methanolysis. The enantiomeric excess of the generated enantioenriched diarylphosphinates were measured via chiral HPLC and the results were compared with the previous measurements (Figure S97 and S98). According to the investigation, (*R*)-**4** catalyst generated (*R,S,R,R*)-**6eb**, which was further derivatized to (*R*)-**8b**.

**Figure S101** Asymmetric HPLC spectrum of (*R*)-**8b** generated from (*R,S,R,R*)-**6eb**.

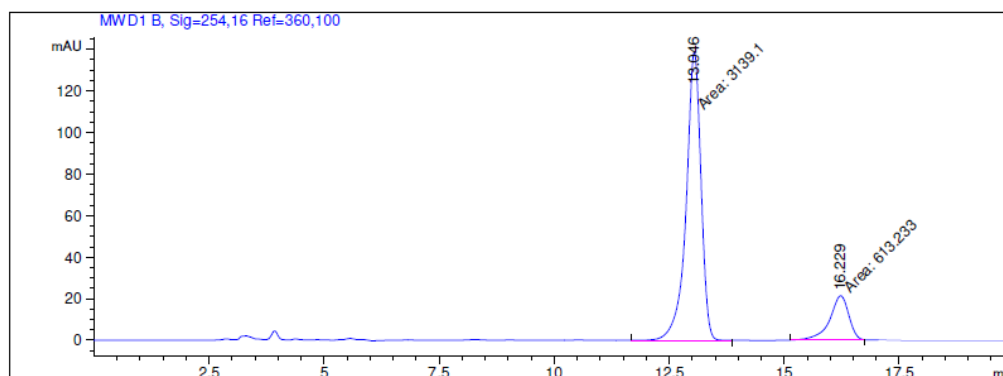

Signal 2: MWD1 B, Sig=254,16 Ref=360,100

| Peak # | RetTime [min] | Type | Width [min] | Area [mAU*s] | Height [mAU] | Area %  |
|--------|---------------|------|-------------|--------------|--------------|---------|
| 1      | 13.046        | MM   | 0.3768      | 3139.10376   | 138.86555    | 83.6573 |
| 2      | 16.229        | MM   | 0.4811      | 613.23328    | 21.24221     | 16.3427 |

Totals : 3752.33704 160.10776

HPLC column: Daicel Chiralpak IC,

Temperature: 23 °C,

Flow rate: 1 ml/min.;

Eluent system: Hexane/IPA (80:20)

**ee=67%**

### Experiment 2:

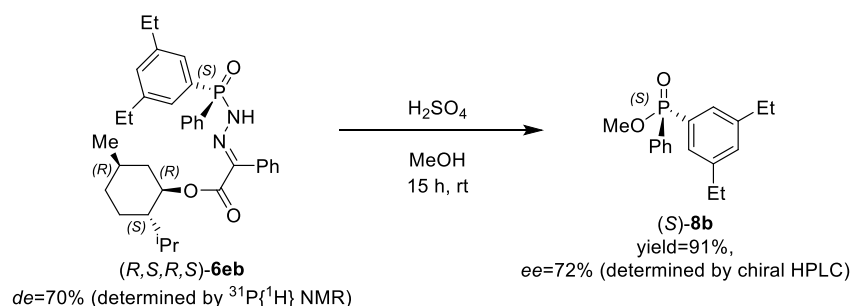

**Figure S102** Asymmetric HPLC spectrum of (*R*)-**8b** generated from (*R,S,R,R*)-**6eb**.

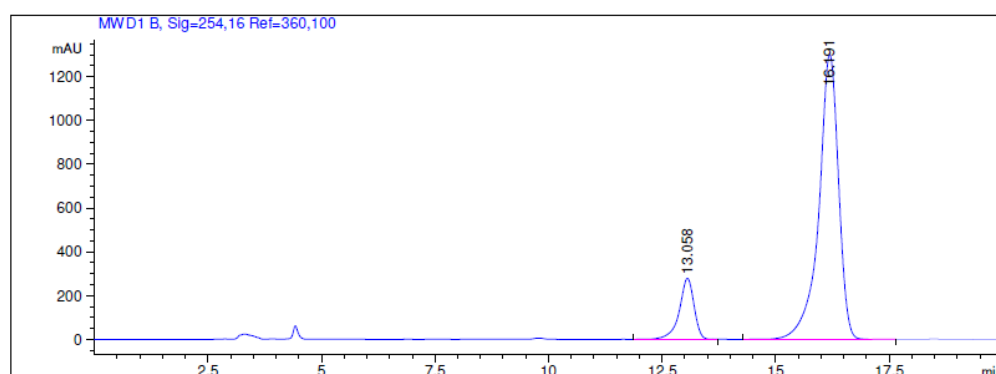

Signal 2: MWD1 B, Sig=254,16 Ref=360,100

| Peak # | RetTime [min] | Type | Width [min] | Area [mAU*s] | Height [mAU] | Area %  |
|--------|---------------|------|-------------|--------------|--------------|---------|
| 1      | 13.058        | BB   | 0.3429      | 6332.87012   | 278.85968    | 13.8680 |
| 2      | 16.191        | BB   | 0.4548      | 3.93326e4    | 1300.71960   | 86.1320 |

Totals : 4.56654e4 1579.57928

**ee=72%**

HPLC column: Daicel Chiralpak IC,

Temperature: 23 °C,

Flow rate: 1 ml/min.;

Eluent system: Hexane/IPA (80:20)

## 6. X-Ray measurement data

### Crystallographic data of (*R*)-3aa.

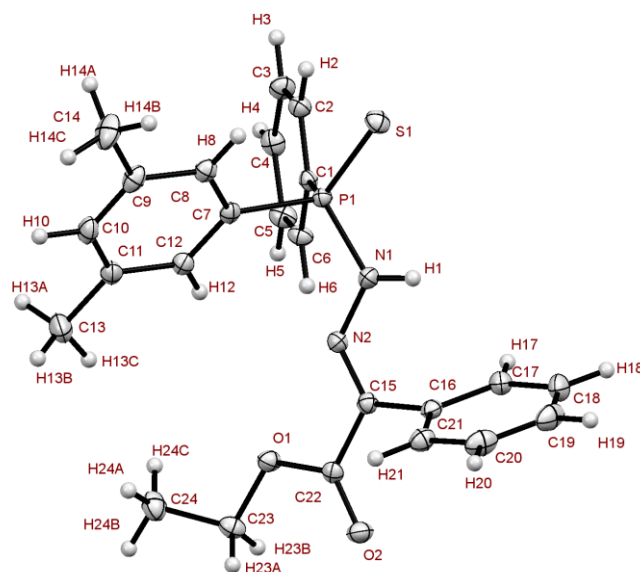

**Figure S103** ORTEP structure of compound (*R*)-3aa with ellipsoids at 50% probability.

A colorless block-like specimen of  $C_{24}H_{25}N_2O_2PS$ , approximate dimensions 0.140 mm x 0.180 mm x 0.210 mm, was used for the X-ray crystallographic analysis. The X-ray intensity data were measured ( $\lambda = 0.71073 \text{ \AA}$ ).

The total exposure time was 0.21 hours. The frames were integrated with the Bruker SAINT software package using a narrow-frame algorithm. The integration of the data using an orthorhombic unit cell yielded a total of 26681 reflections to a maximum  $\theta$  angle of  $35.63^\circ$  ( $0.61 \text{ \AA}$  resolution), of which 10359 were independent (average redundancy 2.576, completeness = 99.5%,  $R_{\text{int}} = 5.44\%$ ,  $R_{\text{sig}} = 8.64\%$ ) and 7687 (74.21%) were greater than  $2\sigma(F^2)$ . The final cell constants of  $a = 8.3139(2) \text{ \AA}$ ,  $b = 16.3794(3) \text{ \AA}$ ,  $c = 16.6172(4) \text{ \AA}$ , volume =  $2262.88(9) \text{ \AA}^3$ , are based upon the refinement of the XYZ-centroids of 6880 reflections above  $20 \sigma(I)$  with  $5.479^\circ < 2\theta < 69.38^\circ$ . Data were corrected for absorption effects using the Multi-Scan method (SADABS). The ratio of minimum to maximum apparent transmission was 0.841. The calculated minimum and maximum transmission coefficients (based on crystal size) are 0.9520 and 0.9680.

The structure was solved and refined using the Bruker SHELXTL Software Package, using the space group  $P 2_1 2_1 2_1$ , with  $Z = 4$  for the formula unit,  $C_{24}H_{25}N_2O_2PS$ . The final anisotropic full-matrix least-squares refinement on  $F^2$  with 274 variables converged at  $R1 = 5.14\%$ , for the observed data and  $wR2 = 11.01\%$  for all data. The goodness-of-fit was 1.027. The largest peak in the final difference electron density synthesis was  $0.525 \text{ e/\AA}^3$  and the largest hole was  $-0.479 \text{ e/\AA}^3$  with an RMS deviation of  $0.079 \text{ e/\AA}^3$ . On the basis of the final model, the calculated density was  $1.281 \text{ g/cm}^3$  and  $F(000)$ , 920  $e^-$ .

Crystallization method: concentrated solution of pure (*R*)-3aa was prepared in DCM (20 mg compound in 2 mL solvent), followed by the slow addition Hexanes in small portions, over a period of one week.

**Table S3. Sample and crystal data for (*R*)-3aa.**

|                         |                        |
|-------------------------|------------------------|
| Identification code     | CCDC 1965254           |
| Crystallization solvent | DCM/ Hexanes           |
| Chemical formula        | $C_{24}H_{25}N_2O_2PS$ |
| Formula weight          | 436.49 g/mol           |
| Temperature             | 100(2) K               |
| Wavelength              | 0.71073 $\text{\AA}$   |

|                               |                           |                     |
|-------------------------------|---------------------------|---------------------|
| <b>Crystal size</b>           | 0.140 x 0.180 x 0.210 mm  |                     |
| <b>Crystal habit</b>          | colorless block           |                     |
| <b>Crystal system</b>         | orthorhombic              |                     |
| <b>Space group</b>            | P 21 21 21                |                     |
| <b>Unit cell dimensions</b>   | a = 8.3139(2) Å           | $\alpha = 90^\circ$ |
|                               | b = 16.3794(3) Å          | $\beta = 90^\circ$  |
|                               | c = 16.6172(4) Å          | $\gamma = 90^\circ$ |
| <b>Volume</b>                 | 2262.88(9) Å <sup>3</sup> |                     |
| <b>Z</b>                      | 4                         |                     |
| <b>Density (calculated)</b>   | 1.281 g/cm <sup>3</sup>   |                     |
| <b>Absorption coefficient</b> | 0.236 mm <sup>-1</sup>    |                     |
| <b>F(000)</b>                 | 920                       |                     |

**Table S4. Data collection and structure refinement for (*R*)-3aa.**

|                                            |                                                                                     |
|--------------------------------------------|-------------------------------------------------------------------------------------|
| <b>Theta range for data collection</b>     | 2.74 to 35.63°                                                                      |
| <b>Index ranges</b>                        | -13 ≤ h ≤ 11, -26 ≤ k ≤ 21, -27 ≤ l ≤ 24                                            |
| <b>Reflections collected</b>               | 26681                                                                               |
| <b>Independent reflections</b>             | 10359 [R(int) = 0.0544]                                                             |
| <b>Coverage of independent reflections</b> | 99.5%                                                                               |
| <b>Absorption correction</b>               | Multi-Scan                                                                          |
| <b>Max. and min. transmission</b>          | 0.9680 and 0.9520                                                                   |
| <b>Structure solution technique</b>        | direct methods                                                                      |
| <b>Structure solution program</b>          | XT, VERSION 2014/5                                                                  |
| <b>Refinement method</b>                   | Full-matrix least-squares on F <sup>2</sup>                                         |
| <b>Refinement program</b>                  | SHELXL-2017/1 (Sheldrick, 2017)                                                     |
| <b>Function minimized</b>                  | $\sum w(F_o^2 - F_c^2)^2$                                                           |
| <b>Data / restraints / parameters</b>      | 10359 / 0 / 274                                                                     |
| <b>Goodness-of-fit on F<sup>2</sup></b>    | 1.027                                                                               |
| <b><math>\Delta/\sigma_{\max}</math></b>   | 0.001                                                                               |
| <b>Final R indices</b>                     | 7687 data; I > 2σ(I) R1 = 0.0514, wR2 = 0.0919                                      |
|                                            | all data R1 = 0.0843, wR2 = 0.1101                                                  |
| <b>Weighting scheme</b>                    | $w = 1/[\sigma^2(F_o^2) + (0.0346P)^2 + 0.5814P]$<br>where $P = (F_o^2 + 2F_c^2)/3$ |
| <b>Absolute structure parameter</b>        | 0.06(3)                                                                             |
| <b>Largest diff. peak and hole</b>         | 0.525 and -0.479 eÅ <sup>-3</sup>                                                   |
| <b>R.M.S. deviation from mean</b>          | 0.079 eÅ <sup>-3</sup>                                                              |



### Crystallographic data of (*R*)-6ca.

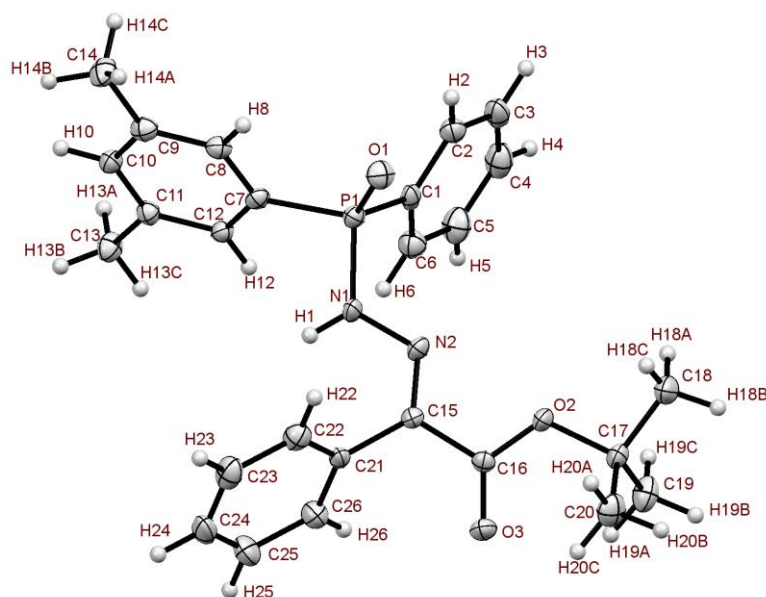

**Figure S104** ORTEP structure of compound (*R*)-6ca with ellipsoids at 50% probability.

A colorless block-like specimen of  $C_{26}H_{29}N_2O_3P$ , approximate dimensions 0.080 mm x 0.120 mm x 0.200 mm, was used for the X-ray crystallographic analysis. The X-ray intensity data were measured ( $\lambda = 0.71073 \text{ \AA}$ ).

A total of 174 frames were collected. The total exposure time was 0.19 hours. The frames were integrated with the Bruker SAINT software package using a narrow-frame algorithm. The integration of the data using an orthorhombic unit cell yielded a total of 25200 reflections to a maximum  $\theta$  angle of  $29.60^\circ$  ( $0.72 \text{ \AA}$  resolution), of which 6637 were independent (average redundancy 3.797, completeness = 99.6%,  $R_{\text{int}} = 8.45\%$ ,  $R_{\text{sig}} = 8.00\%$ ) and 5168 (77.87%) were greater than  $2\sigma(F^2)$ . The final cell constants of  $a = 8.9507(3) \text{ \AA}$ ,  $b = 11.6512(5) \text{ \AA}$ ,  $c = 22.9288(9) \text{ \AA}$ , volume =  $2391.16(16) \text{ \AA}^3$ , are based upon the refinement of the XYZ-centroids of 3997 reflections above  $20 \sigma(I)$  with  $4.984^\circ < 2\theta < 55.26^\circ$ . Data were corrected for absorption effects using the Multi-Scan method (SADABS). The ratio of minimum to maximum apparent transmission was 0.828. The calculated minimum and maximum transmission coefficients (based on crystal size) are 0.9720 and 0.9890.

The structure was solved and refined using the Bruker SHELXTL Software Package, using the space group P 21 21 21, with  $Z = 4$  for the formula unit,  $C_{26}H_{29}N_2O_3P$ . The final anisotropic full-matrix least-squares refinement on  $F^2$  with 295 variables converged at  $R1 = 5.89\%$ , for the observed data and  $wR2 = 13.93\%$  for all data. The goodness-of-fit was 1.057. The largest peak in the final difference electron density synthesis was  $0.819 \text{ e}/\text{\AA}^3$  and the largest hole was  $-0.414 \text{ e}/\text{\AA}^3$  with an RMS deviation of  $0.070 \text{ e}/\text{\AA}^3$ . On the basis of the final model, the calculated density was  $1.246 \text{ g}/\text{cm}^3$  and  $F(000)$ , 952  $e^-$ .

Crystallization method: concentrated solution of pure (*R*)-6ca was prepared in DCM (20 mg compound in 2 mL solvent), followed by the slow addition Hexanes in small portions, over a period of one week.

### Table S5. Sample and crystal data for (*R*)-6ca.

|                         |                          |
|-------------------------|--------------------------|
| Identification code     | CCDC 1965253             |
| Crystallization solvent | DCM/ Hexanes             |
| Chemical formula        | $C_{26}H_{29}N_2O_3P$    |
| Formula weight          | 448.48 g/mol             |
| Temperature             | 100(2) K                 |
| Wavelength              | 0.71073 $\text{\AA}$     |
| Crystal size            | 0.080 x 0.120 x 0.200 mm |

|                               |                            |                     |
|-------------------------------|----------------------------|---------------------|
| <b>Crystal habit</b>          | colorless block            |                     |
| <b>Crystal system</b>         | orthorhombic               |                     |
| <b>Space group</b>            | P 21 21 21                 |                     |
| <b>Unit cell dimensions</b>   | a = 8.9507(3) Å            | $\alpha = 90^\circ$ |
|                               | b = 11.6512(5) Å           | $\beta = 90^\circ$  |
|                               | c = 22.9288(9) Å           | $\gamma = 90^\circ$ |
| <b>Volume</b>                 | 2391.16(16) Å <sup>3</sup> |                     |
| <b>Z</b>                      | 4                          |                     |
| <b>Density (calculated)</b>   | 1.246 g/cm <sup>3</sup>    |                     |
| <b>Absorption coefficient</b> | 0.144 mm <sup>-1</sup>     |                     |
| <b>F(000)</b>                 | 952                        |                     |

**Table S6. Data collection and structure refinement for (*R*)-6ca.**

|                                            |                                                                                                                                                                       |
|--------------------------------------------|-----------------------------------------------------------------------------------------------------------------------------------------------------------------------|
| <b>Theta range for data collection</b>     | 2.87 to 29.60°                                                                                                                                                        |
| <b>Index ranges</b>                        | -12 ≤ h ≤ 9, -15 ≤ k ≤ 16, -30 ≤ l ≤ 31                                                                                                                               |
| <b>Reflections collected</b>               | 25200                                                                                                                                                                 |
| <b>Independent reflections</b>             | 6637 [R(int) = 0.0845]                                                                                                                                                |
| <b>Coverage of independent reflections</b> | 99.6%                                                                                                                                                                 |
| <b>Absorption correction</b>               | Multi-Scan                                                                                                                                                            |
| <b>Max. and min. transmission</b>          | 0.9890 and 0.9720                                                                                                                                                     |
| <b>Structure solution technique</b>        | direct methods                                                                                                                                                        |
| <b>Structure solution program</b>          | XT, VERSION 2014/5                                                                                                                                                    |
| <b>Refinement method</b>                   | Full-matrix least-squares on F <sup>2</sup>                                                                                                                           |
| <b>Refinement program</b>                  | SHELXL-2018/3 (Sheldrick, 2018)                                                                                                                                       |
| <b>Function minimized</b>                  | $\sum w(F_o^2 - F_c^2)^2$                                                                                                                                             |
| <b>Data / restraints / parameters</b>      | 6637 / 0 / 295                                                                                                                                                        |
| <b>Goodness-of-fit on F<sup>2</sup></b>    | 1.057                                                                                                                                                                 |
| <b><math>\Delta/\sigma_{\max}</math></b>   | 0.001                                                                                                                                                                 |
| <b>Final R indices</b>                     | 5168 data; I > 2σ(I) R1 = 0.0589, wR2 = 0.1233<br>all data R1 = 0.0874, wR2 = 0.1393                                                                                  |
| <b>Weighting scheme</b>                    | w = 1/[σ <sup>2</sup> (F <sub>o</sub> <sup>2</sup> ) + (0.0573P) <sup>2</sup> + 0.7719P]<br>where P = (F <sub>o</sub> <sup>2</sup> + 2F <sub>c</sub> <sup>2</sup> )/3 |
| <b>Absolute structure parameter</b>        | 0.25(16)                                                                                                                                                              |
| <b>Largest diff. peak and hole</b>         | 0.819 and -0.414 eÅ <sup>-3</sup>                                                                                                                                     |
| <b>R.M.S. deviation from mean</b>          | 0.070 eÅ <sup>-3</sup>                                                                                                                                                |

## Crystallographic data of 6ai.

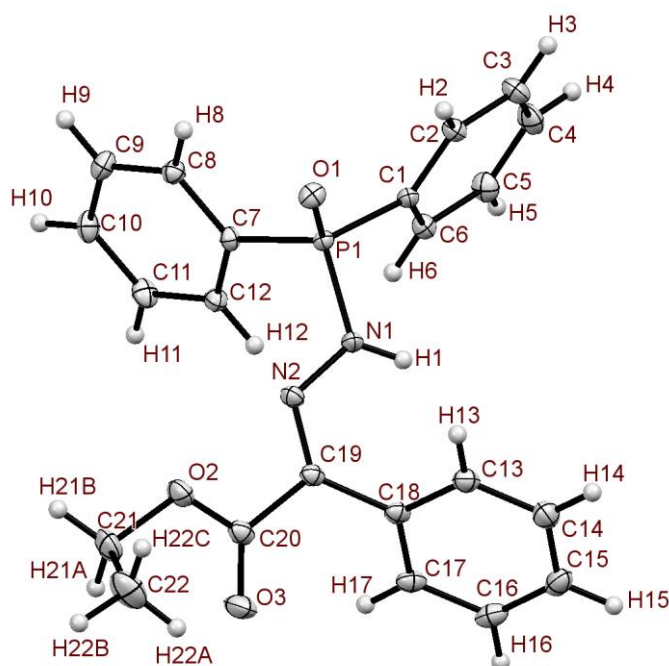

**Figure S105** ORTEP structure of compound **6ai** with ellipsoids at 50% probability.

A colorless needle-like specimen of  $C_{22}H_{21}N_2O_3P$ , approximate dimensions 0.020 mm x 0.040 mm x 0.220 mm, was used for the X-ray crystallographic analysis. The X-ray intensity data were measured ( $\lambda = 0.71073 \text{ \AA}$ ).

A total of 301 frames were collected. The total exposure time was 0.33 hours. The frames were integrated with the Bruker SAINT software package using a narrow-frame algorithm. The integration of the data using an orthorhombic unit cell yielded a total of 27042 reflections to a maximum  $\theta$  angle of  $32.57^\circ$  ( $0.66 \text{ \AA}$  resolution), of which 7052 were independent (average redundancy 3.835, completeness = 99.7%,  $R_{\text{int}} = 5.52\%$ ,  $R_{\text{sig}} = 5.83\%$ ) and 6059 (85.92%) were greater than  $2\sigma(F^2)$ . The final cell constants of  $a = 8.4671(2) \text{ \AA}$ ,  $b = 10.4320(2) \text{ \AA}$ ,  $c = 22.0317(4) \text{ \AA}$ , volume =  $1946.03(7) \text{ \AA}^3$ , are based upon the refinement of the XYZ-centroids of 7853 reflections above  $20 \sigma(I)$  with  $5.154^\circ < 2\theta < 64.81^\circ$ . Data were corrected for absorption effects using the Multi-Scan method (SADABS). The ratio of minimum to maximum apparent transmission was 0.832. The calculated minimum and maximum transmission coefficients (based on crystal size) are 0.9640 and 0.9970.

The structure was solved and refined using the Bruker SHELXTL Software Package, using the space group P 21 21 21, with  $Z = 4$  for the formula unit,  $C_{22}H_{21}N_2O_3P$ . The final anisotropic full-matrix least-squares refinement on  $F^2$  with 254 variables converged at  $R1 = 4.38\%$ , for the observed data and  $wR2 = 9.55\%$  for all data. The goodness-of-fit was 1.066. The largest peak in the final difference electron density synthesis was  $0.354 \text{ e/\AA}^3$  and the largest hole was  $-0.343 \text{ e/\AA}^3$  with an RMS deviation of  $0.059 \text{ e/\AA}^3$ . On the basis of the final model, the calculated density was  $1.339 \text{ g/cm}^3$  and  $F(000)$ , 824  $e^-$ .

Crystallization method: concentrated solution of pure **6ai** was prepared in DCM (20 mg compound in 2 mL solvent), followed by the slow addition Hexanes in small portions, over a period of one week.

### Table S7. Sample and crystal data for **6ai**.

|                         |                       |
|-------------------------|-----------------------|
| Identification code     | CCDC 1965252          |
| Crystallization solvent | DCM/ Hexanes          |
| Chemical formula        | $C_{22}H_{21}N_2O_3P$ |
| Formula weight          | 392.38 g/mol          |
| Temperature             | 100(2) K              |

|                               |                           |                     |
|-------------------------------|---------------------------|---------------------|
| <b>Wavelength</b>             | 0.71073 Å                 |                     |
| <b>Crystal size</b>           | 0.020 x 0.040 x 0.220 mm  |                     |
| <b>Crystal habit</b>          | colorless needle          |                     |
| <b>Crystal system</b>         | orthorhombic              |                     |
| <b>Space group</b>            | P 21 21 21                |                     |
| <b>Unit cell dimensions</b>   | a = 8.4671(2) Å           | $\alpha = 90^\circ$ |
|                               | b = 10.4320(2) Å          | $\beta = 90^\circ$  |
|                               | c = 22.0317(4) Å          | $\gamma = 90^\circ$ |
| <b>Volume</b>                 | 1946.03(7) Å <sup>3</sup> |                     |
| <b>Z</b>                      | 4                         |                     |
| <b>Density (calculated)</b>   | 1.339 g/cm <sup>3</sup>   |                     |
| <b>Absorption coefficient</b> | 0.167 mm <sup>-1</sup>    |                     |
| <b>F(000)</b>                 | 824                       |                     |

**Table S8. Data collection and structure refinement for 6ai.**

|                                            |                                                                                    |
|--------------------------------------------|------------------------------------------------------------------------------------|
| <b>Theta range for data collection</b>     | 2.69 to 32.57°                                                                     |
| <b>Index ranges</b>                        | -9<= <i>h</i> <=12, -14<= <i>k</i> <=15, -32<= <i>l</i> <=33                       |
| <b>Reflections collected</b>               | 27042                                                                              |
| <b>Independent reflections</b>             | 7052 [R(int) = 0.0552]                                                             |
| <b>Coverage of independent reflections</b> | 99.7%                                                                              |
| <b>Absorption correction</b>               | Multi-Scan                                                                         |
| <b>Max. and min. transmission</b>          | 0.9970 and 0.9640                                                                  |
| <b>Structure solution technique</b>        | direct methods                                                                     |
| <b>Structure solution program</b>          | XT, VERSION 2014/5                                                                 |
| <b>Refinement method</b>                   | Full-matrix least-squares on F <sup>2</sup>                                        |
| <b>Refinement program</b>                  | SHELXL-2018/3 (Sheldrick, 2018)                                                    |
| <b>Function minimized</b>                  | $\Sigma w(F_o^2 - F_c^2)^2$                                                        |
| <b>Data / restraints / parameters</b>      | 7052 / 0 / 254                                                                     |
| <b>Goodness-of-fit on F<sup>2</sup></b>    | 1.066                                                                              |
| <b>Final R indices</b>                     | 6059 data; I>2σ(I) R1 = 0.0438, wR2 = 0.0881<br>all data R1 = 0.0580, wR2 = 0.0955 |
| <b>Weighting scheme</b>                    | $w=1/[\sigma^2(F_o^2)+(0.0371P)^2+0.3454P]$<br>where $P=(F_o^2+2F_c^2)/3$          |
| <b>Absolute structure parameter</b>        | 0.03(4)                                                                            |
| <b>Largest diff. peak and hole</b>         | 0.354 and -0.343 eÅ <sup>-3</sup>                                                  |
| <b>R.M.S. deviation from mean</b>          | 0.059 eÅ <sup>-3</sup>                                                             |

### Crystallographic data of ( $\pm$ )-6bc.

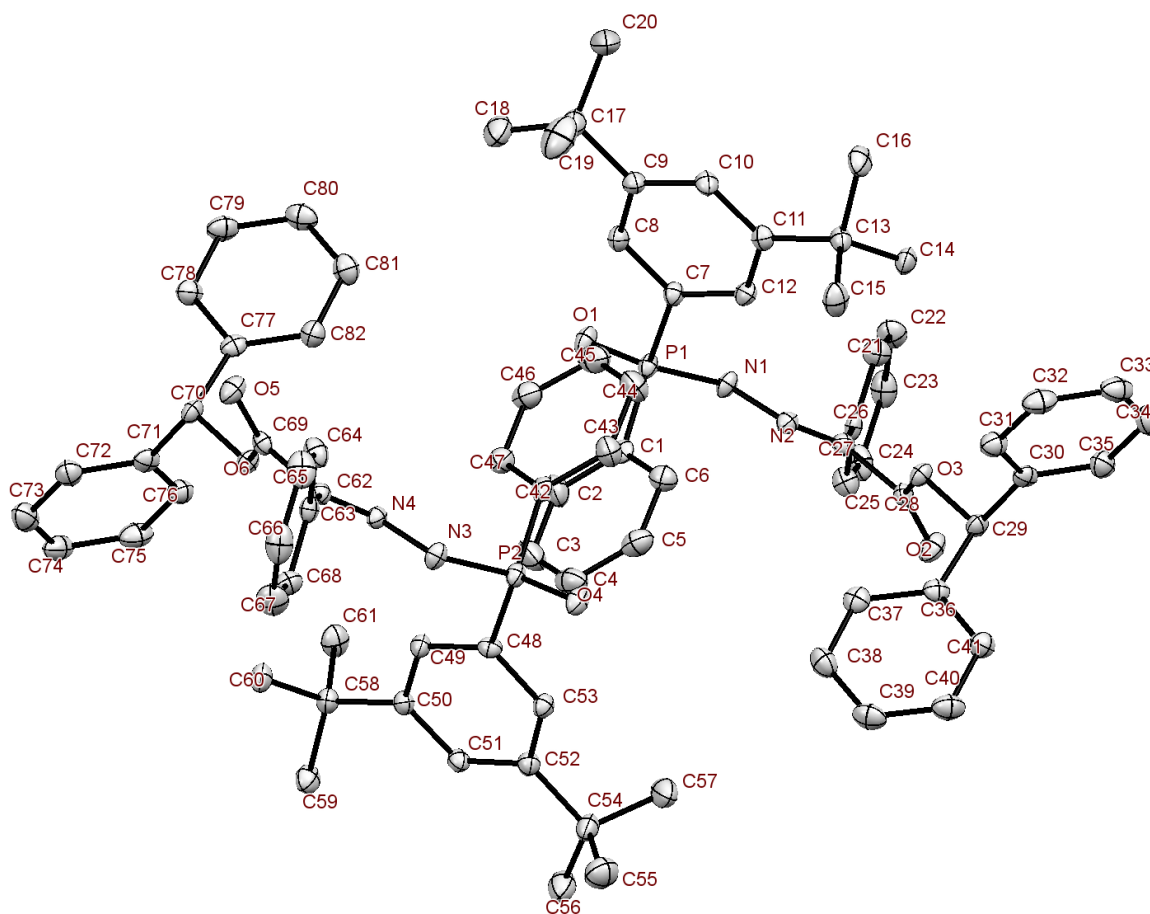

**Figure S106** ORTEP structure of compound ( $\pm$ )-6bc with ellipsoids at 50% probability.

A colorless block-like specimen of  $C_{41}H_{43}N_2O_3P$ , approximate dimensions 0.140 mm x 0.200 mm x 0.220 mm, was used for the X-ray crystallographic analysis. The X-ray intensity data were measured ( $\lambda = 0.71073 \text{ \AA}$ ).

A total of 635 frames were collected. The total exposure time was 0.18 hours. The frames were integrated with the Bruker SAINT software package using a narrow-frame algorithm. The integration of the data using a triclinic unit cell yielded a total of 72111 reflections to a maximum  $\theta$  angle of  $29.58^\circ$  ( $0.72 \text{ \AA}$  resolution), of which 19085 were independent (average redundancy 3.778, completeness = 99.6%,  $R_{\text{int}} = 11.31\%$ ,  $R_{\text{sig}} = 11.50\%$ ) and 9211 (48.26%) were greater than  $2\sigma(F^2)$ . The final cell constants of  $a = 11.2032(6) \text{ \AA}$ ,  $b = 11.6162(6) \text{ \AA}$ ,  $c = 27.3632(15) \text{ \AA}$ ,  $\alpha = 79.7546(18)^\circ$ ,  $\beta = 79.3863(19)^\circ$ ,  $\gamma = 80.302(2)^\circ$ , volume =  $3410.2(3) \text{ \AA}^3$ , are based upon the refinement of the XYZ-centroids of 7188 reflections above  $20 \sigma(I)$  with  $4.810^\circ < 2\theta < 59.06^\circ$ . Data were corrected for absorption effects using the Multi-Scan method (SADABS). The ratio of minimum to maximum apparent transmission was 0.885. The calculated minimum and maximum transmission coefficients (based on crystal size) are 0.9740 and 0.9830.

The structure was solved and refined using the Bruker SHELXTL Software Package, using the space group P -1, with  $Z = 4$  for the formula unit,  $C_{41}H_{43}N_2O_3P$ . The final anisotropic full-matrix least-squares refinement on  $F^2$  with 859 variables converged at  $R1 = 7.35\%$ , for the observed data and  $wR2 = 20.41\%$  for all data. The goodness-of-fit was 1.033. The largest peak in the final difference electron density synthesis was  $0.978 \text{ e/\AA}^3$  and the largest hole was  $-0.543 \text{ e/\AA}^3$  with an RMS deviation of  $0.076 \text{ e/\AA}^3$ . On the basis of the final model, the calculated density was  $1.252 \text{ g/cm}^3$  and  $F(000)$ , 1368  $e^-$ .

Crystallization method: concentrated solution of pure **6ai** was prepared in DCM (20 mg compound in 2 mL solvent), followed by the slow addition Hexanes in small portions, over a period of one week.

**Table S9. Sample and crystal data for (±)-6bc.**

|                         |                                                                 |                              |
|-------------------------|-----------------------------------------------------------------|------------------------------|
| Identification code     | CCDC 1965255                                                    |                              |
| Crystallization solvent | DCM/ Hexanes                                                    |                              |
| Chemical formula        | C <sub>41</sub> H <sub>43</sub> N <sub>2</sub> O <sub>3</sub> P |                              |
| Formula weight          | 642.74 g/mol                                                    |                              |
| Temperature             | 100(2) K                                                        |                              |
| Wavelength              | 0.71073 Å                                                       |                              |
| Crystal size            | 0.140 x 0.200 x 0.220 mm                                        |                              |
| Crystal habit           | colorless block                                                 |                              |
| Crystal system          | triclinic                                                       |                              |
| Space group             | P -1                                                            |                              |
| Unit cell dimensions    | a = 11.2032(6) Å                                                | $\alpha = 79.7546(18)^\circ$ |
|                         | b = 11.6162(6) Å                                                | $\beta = 79.3863(19)^\circ$  |
|                         | c = 27.3632(15) Å                                               | $\gamma = 80.302(2)^\circ$   |
| Volume                  | 3410.2(3) Å <sup>3</sup>                                        |                              |
| Z                       | 4                                                               |                              |
| Density (calculated)    | 1.252 g/cm <sup>3</sup>                                         |                              |
| Absorption coefficient  | 0.123 mm <sup>-1</sup>                                          |                              |
| F(000)                  | 1368                                                            |                              |

**Table S10. Data collection and structure refinement for (±)-6bc.**

|                                     |                                                                                                                                                               |  |
|-------------------------------------|---------------------------------------------------------------------------------------------------------------------------------------------------------------|--|
| Theta range for data collection     | 2.30 to 29.58°                                                                                                                                                |  |
| Index ranges                        | -15<=h<=15, -16<=k<=14, -37<=l<=37                                                                                                                            |  |
| Reflections collected               | 72111                                                                                                                                                         |  |
| Independent reflections             | 19085 [R(int) = 0.1131]                                                                                                                                       |  |
| Coverage of independent reflections | 99.6%                                                                                                                                                         |  |
| Absorption correction               | Multi-Scan                                                                                                                                                    |  |
| Max. and min. transmission          | 0.9830 and 0.9740                                                                                                                                             |  |
| Structure solution technique        | direct methods                                                                                                                                                |  |
| Structure solution program          | XT, VERSION 2014/5                                                                                                                                            |  |
| Refinement method                   | Full-matrix least-squares on F <sup>2</sup>                                                                                                                   |  |
| Refinement program                  | SHELXL-2018/3 (Sheldrick, 2018)                                                                                                                               |  |
| Function minimized                  | $\Sigma w(F_o^2 - F_c^2)^2$                                                                                                                                   |  |
| Data / restraints / parameters      | 19085 / 0 / 859                                                                                                                                               |  |
| Goodness-of-fit on F <sup>2</sup>   | 1.033                                                                                                                                                         |  |
| Final R indices                     | 9211 data; I>2σ(I) R1 = 0.0735, wR2 = 0.1574                                                                                                                  |  |
|                                     | all data R1 = 0.1657, wR2 = 0.2041                                                                                                                            |  |
| Weighting scheme                    | w=1/[σ <sup>2</sup> (F <sub>o</sub> <sup>2</sup> )+(0.0621P) <sup>2</sup> +2.3549P]<br>where P=(F <sub>o</sub> <sup>2</sup> +2F <sub>c</sub> <sup>2</sup> )/3 |  |
| Largest diff. peak and hole         | 0.978 and -0.543 eÅ <sup>-3</sup>                                                                                                                             |  |
| R.M.S. deviation from mean          | 0.076 eÅ <sup>-3</sup>                                                                                                                                        |  |

## 5. References

1. Huang, Y.; Pullarkat, S. A.; Li, Y.; Leung, P.-H., Palladium(ii)-catalyzed asymmetric hydrophosphination of enones: efficient access to chiral tertiary phosphines. *Chem. Comm.* **2010**, 46 (37), 6950-6952.
2. Huang, Y.; Pullarkat, S. A.; Li, Y.; Leung, P.-H., Palladacycle-Catalyzed Asymmetric Hydrophosphination of Enones for Synthesis of C\*- and P\*-Chiral Tertiary Phosphines. *Inorg. Chem.* **2012**, 51 (4), 2533-2540.
3. Yang, X.-Y.; Gan, J. H.; Li, Y.; Pullarkat, S. A.; Leung, P.-H., Palladium catalyzed asymmetric hydrophosphination of  $\alpha,\beta$ - and  $\alpha,\beta,\gamma,\delta$ -unsaturated malonate esters – efficient control of reactivity, stereo- and regio-selectivity. *Dalton Trans.* **2015**, 44 (3), 1258-1263.
4. Messerle, L.; Curtis, M. D., Reaction of diaryldiazomethanes with a metal-metal triple bond: synthesis, structural characterizations, and reactivity of novel bridging diazoalkane and alkylidene complexes. *J. Am. Chem. Soc.* **1980**, 102 (26), 7789-7791.
5. Maxwell, J. L.; Brown, K. C.; Bartley, D. W.; Kodadek, T., Mechanism of the Rhodium Porphyrin-Catalyzed Cyclopropanation of Alkenes. *Science* **1992**, 256 (5063), 1544-1547.
6. Straub, B. F.; Rominger, F.; Hofmann, P., Transition metal  $\alpha$ -carbonyl diazoalkane coordination chemistry: structures derived from a side-on diazomalonate platinum complex. *Inorg. Chem. Comm.* **2000**, 3 (5), 214-217.
7. Straub, B. F., Pd(0) Mechanism of Palladium-Catalyzed Cyclopropanation of Alkenes by CH<sub>2</sub>N<sub>2</sub>: A DFT Study. *J. Am. Chem. Soc.* **2002**, 124 (47), 14195-14201.
8. Harrold, N. D.; Corcos, A. R.; Hillhouse, G. L., Synthesis, structures, and catalytic reactivity of bis(N-heterocyclic carbene) supported diphenyldiazomethane and 1-azidoadamantane complexes of nickel. *J. Org. Chem.* **2016**, 813, 46-54.
9. Rull, S. G.; Álvarez, E.; Fructos, M. R.; Belderrain, T. R.; Pérez, P. J., The Elusive Palladium-Diazo Adduct Captured: Synthesis, Isolation and Structural Characterization of [(ArNHC-PPh<sub>2</sub>)Pd( $\eta$ <sup>2</sup>-N<sub>2</sub>C(Ph)CO<sub>2</sub>Et)]. *Chem. Eur. J.* **2017**, 23 (32), 7667-7671.
10. Wong, F. M.; Wang, J.; Hengge, A. C.; Wu, W., Mechanism of Rhodium-Catalyzed Carbene Formation from Diazo Compounds. *Org. Lett.* **2007**, 9 (9), 1663-1665.
11. de Frémont, P.; Marion, N.; Nolan, S. P., Carbenes: Synthesis, properties, and organometallic chemistry. *Coord. Chem. Rev.* **2009**, 253 (7), 862-892.
12. Xia, Y.; Qiu, D.; Wang, J., Transition-Metal-Catalyzed Cross-Couplings through Carbene Migratory Insertion. *Chem. Rev.* **2017**, 117 (23), 13810-13889.
13. Jia, Y.-X.; Li, B.-B.; Li, Y.; Pullarkat, S. A.; Xu, K.; Hirao, H.; Leung, P.-H., Stereoelectronic and Catalytic Properties of Chiral Cyclometalated Phospha-palladium and -platinum Complexes. *Organometallics* **2014**, 33 (21), 6053-6058.
